# Supplementary material for: Predicting human genes susceptible to genomic instability associated with Alu/Alu-mediated rearrangements
Source: PubMed Central journal article supplement — Genome Res. 2018 Aug;28(8):1228–42. doi: 10.1101/gr.229401.117 (PMC6071635; doi:10.1101/gr.229401.117), 2018-08

**Supplemental Fig S5. The difference between CNV-*Alu* pairs and Ctrl-*Alu* pairs in pairwise features.** For each feature of *Alu* sequence, including *Alu* length, GC percentage, max. matching score of A Boxes in active *Alus*, max. matching score of B Boxes in active *Alus*, length of the poly(A) tail, max. matching score of PRDM9 binding motif, number of PRDM9 binding motif and *Alu* density, three panels are presented with respect to the minimum, mean and maximum value of each pair. For the genomic characteristics including replication timing, average methylation score and the percentage of methylated region, one more panel is plotted showing the absolute difference value of each pair besides the three panels.

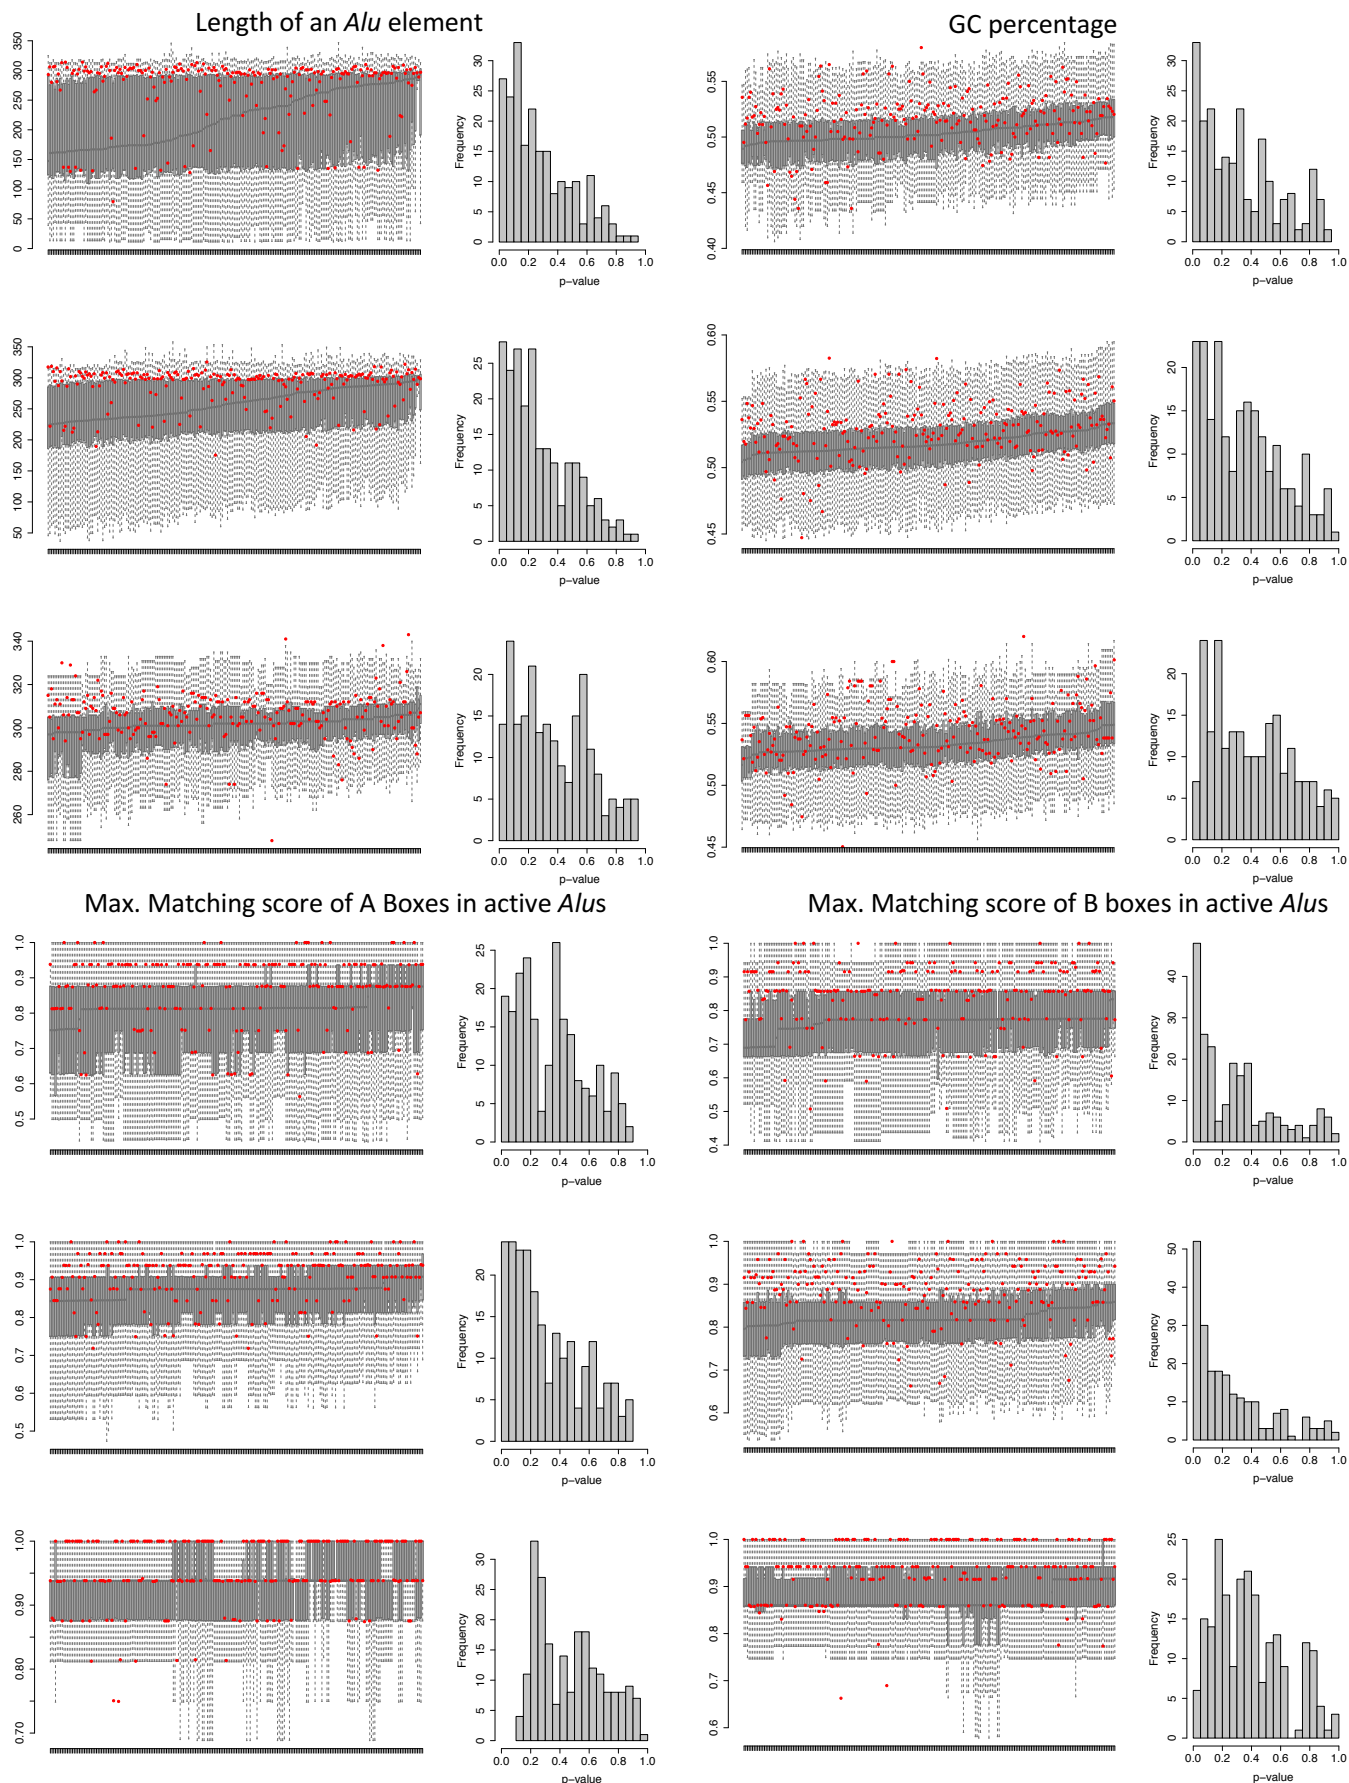

Length of the poly(A) tail

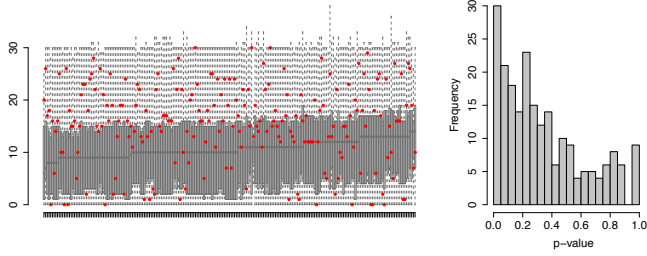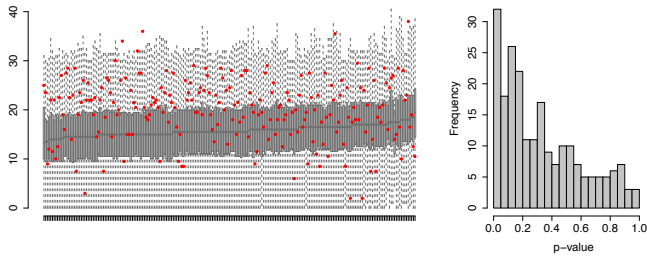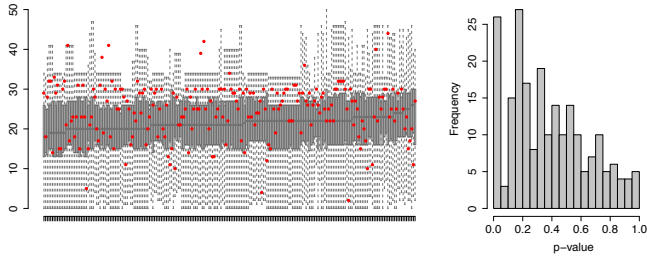

Max. matching score of PRDM9 binding motif

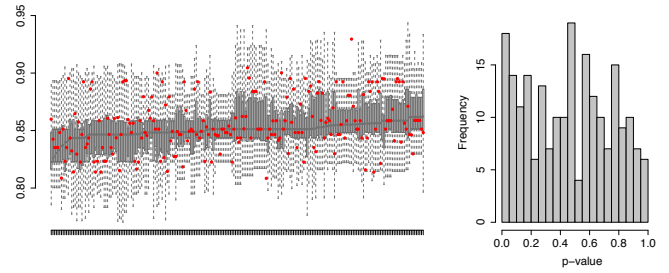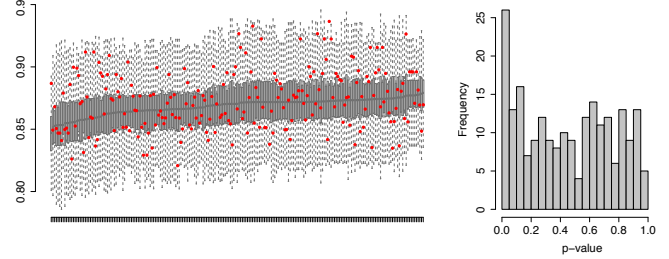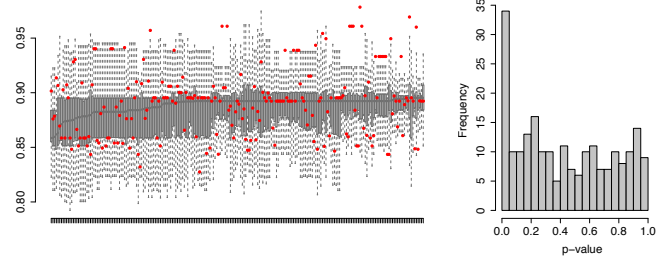

Number of PRDM9 binding motif

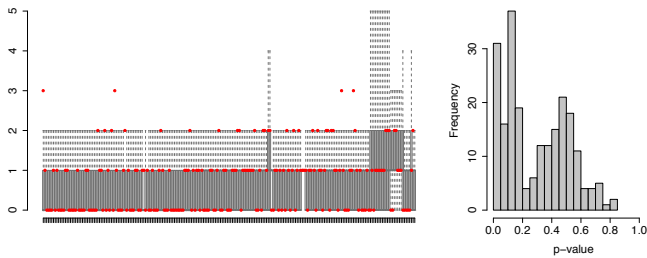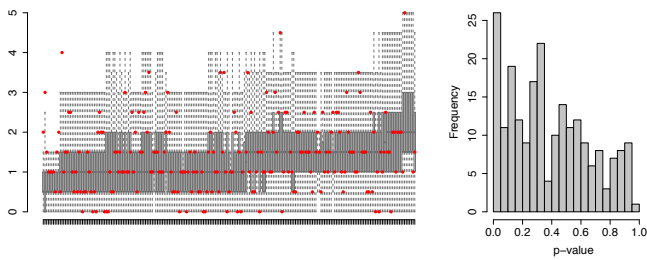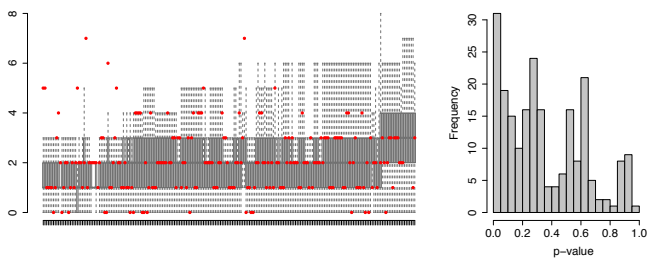

*Alu* density

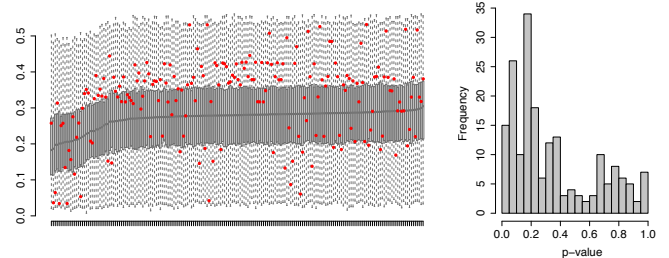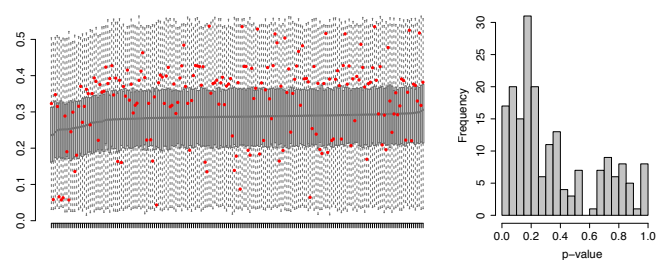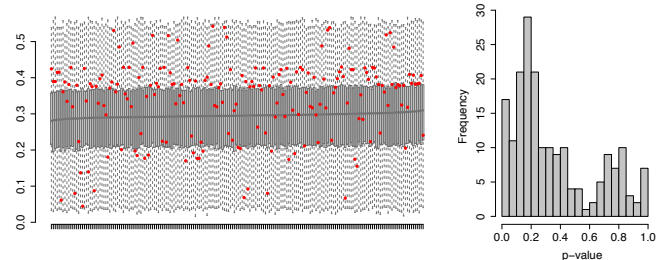

### Replication timing

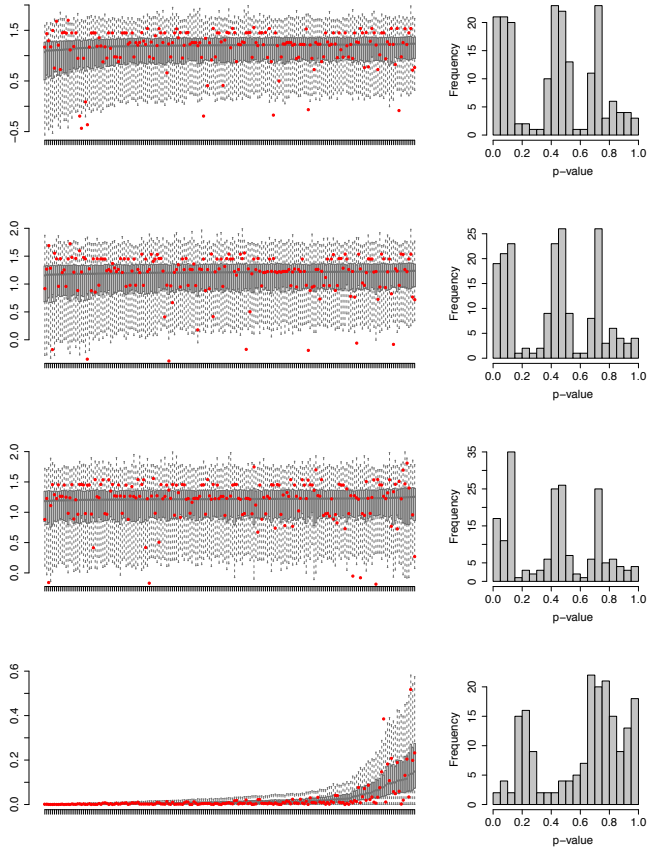

### Average methylation level

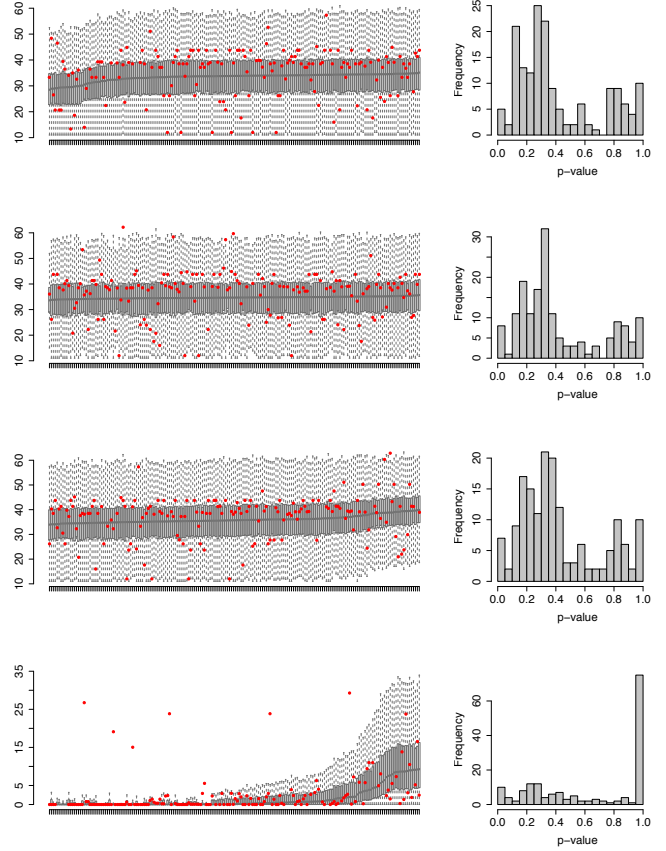

### Percentage of methylated region

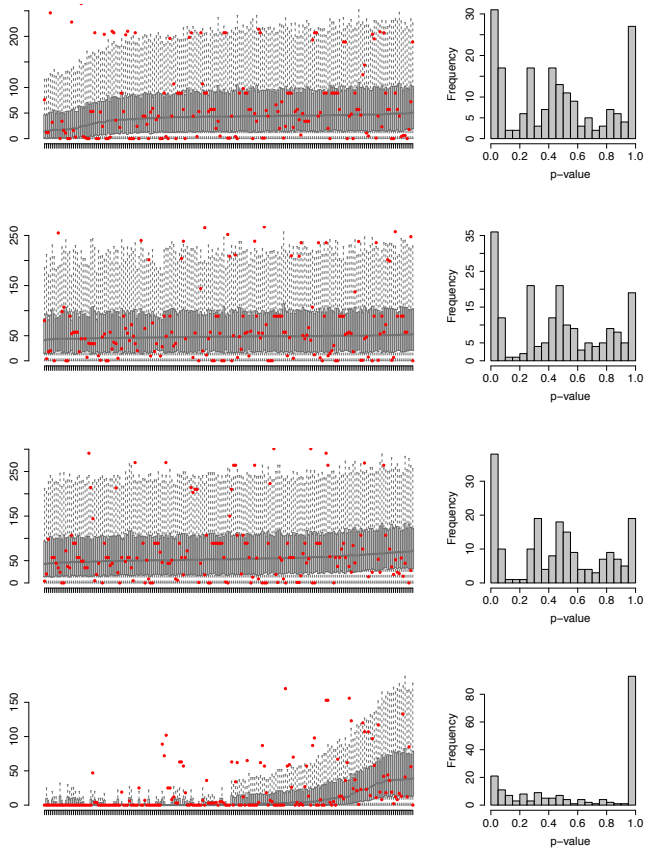

Supplement: supp_gr.229401.117_Supplemental_Fig_S5.pdf [file supp_gr.229401.117_Supplemental_Fig_S5.pdf]
