# Supplementary material for: Predicting human genes susceptible to genomic instability associated with Alu/Alu-mediated rearrangements
Source: PubMed Central journal article supplement — Genome Res. 2018 Aug;28(8):1228–42. doi: 10.1101/gr.229401.117 (PMC6071635; doi:10.1101/gr.229401.117), 2018-08

**Supplemental Fig S7. A summary figure showing the results of 89 aCGHs and 53 nucleotide-level breakpoint junctions.** Red dots signify relative copy number gain of that specific interrogating oligonucleotide probe and thus in aggregate indicate the genomic interval duplicated, and green dots indicate copy number loss. For each of the 53 samples with breakpoint junctions solved at nucleotide-level resolution, we showed the sequences at the junctions under the aCGH result. The first line of sequence shows the reference sequence on the 5' end; the middle line shows the sample sequence; and the bottom line shows the 3-end reference sequence. The sequences are on the plus strand. The repetitive elements covering the breakpoints and their orientation are annotated near the relative reference sequences. The sequence of microhomology at the breakpoint junction is highlighted in red. The grey sequence starts from the first mismatching base. For those with no microhomology at the breakpoints, we colored the first base near the aligned sequence in green and documented its position. The genomic coordinates of the microhomologies are annotated in hg19 assembly.

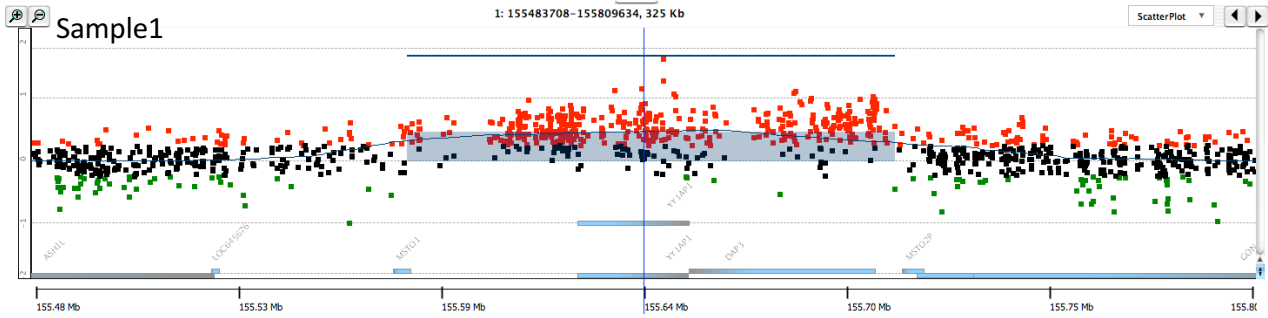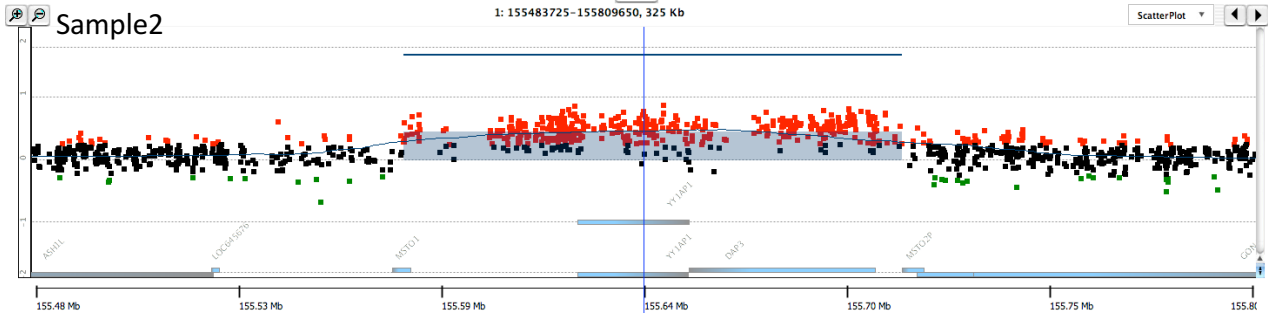

LCR + Chr1:15571167-155723605  
 GAAAGGATGTGTTTGC GGACCAATAAGTCGCCAGTATAACACCCGCCACGCGCCTGCCAAGCCAAT...  
 GAAAGGATGTGTTTGC GGACCAATAAGTCGCCAGTATAACACCCGCCACGCGCCTGCCAAGCCAAT...  
 AAAGGATGTGTTTGC GGGCCAATAAGTAGCCGAGAATAACACCCGCCACGCGCCTGCCAAGCCAAT...  
 LCR + Chr1:155573392-155587902

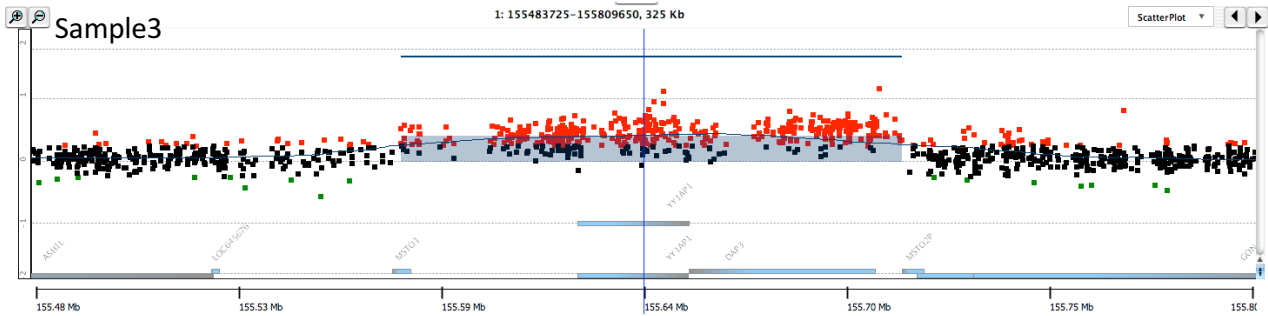

LCR +  
 GAAAGGATGTGTTTGC GGACCAATAAGTCGCCAGTATAACACCCGCCACGCGCCTGCCAAGCCAAT...  
 GAAAGGATGTGTTTGC GGACCAATAAGTCGCCAGTATAACACCCGCCACGCGCCTGCCAAGCCAAT...  
 AAAGGATGTGTTTGC GGGCCAATAAGTAGCCGAGAATAACACCCGCCACGCGCCTGCCAAGCCAAT...  
 LCR +

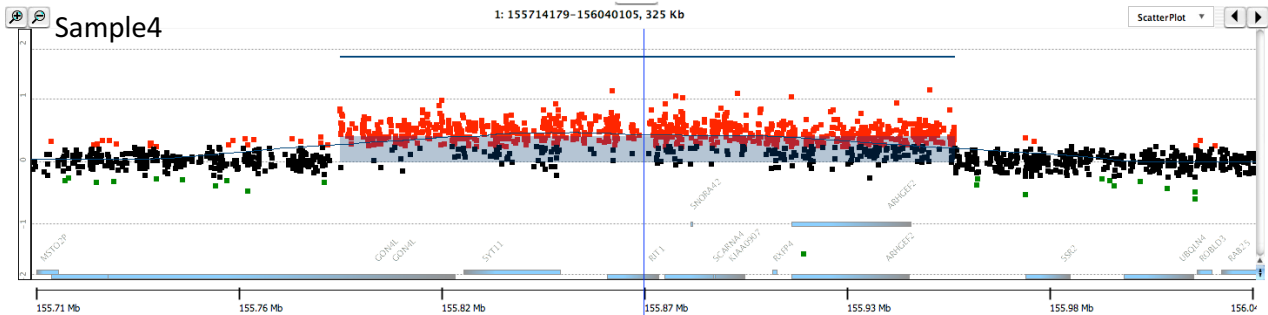

Chr1:155960080-155960081  
 CATGAGTTAATCCAAGACATCCTGGGTTGTCCTCAGCCTGCAACCAAAGCCCGCAAAGGCCTGGCAAT  
 CATGAGTTAATCCAAGACATCCTGGGTTGTCCTCAGATCGAGACCAGCCTGGCCAACATGGTGAAAGCCC  
 GGAGGCCGAGGCGGGCAGATCACTGAGGTCAGGAGATCGAGACCAGCCTGGCCAACATGGTGAAAGCCC  
 Alu<sub>Sx</sub> + Chr1:155795157-155795158

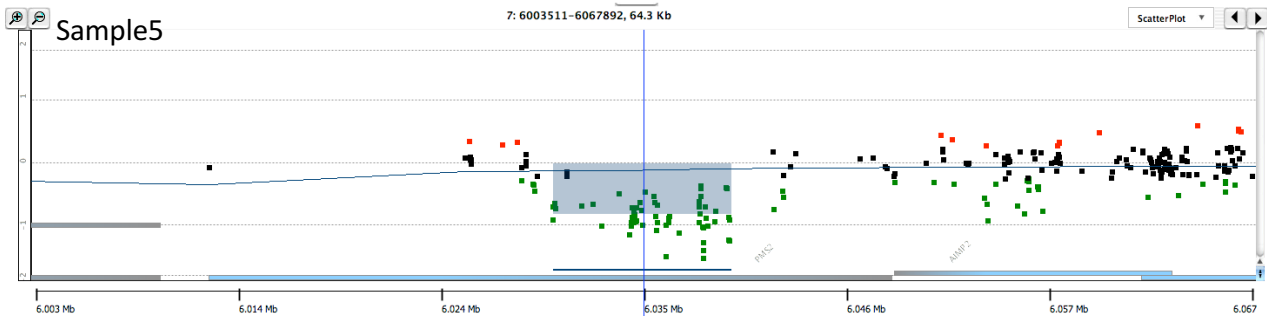

L1 + Chr7:6030869-6030872  
 AGAAACATTCACATCTAAGGATAAAGAGCAGTATACAA AATTATTTTCTCATCCCAAAGAATATGGGAG  
 AGAAACATTCACATCTAAGGATAAAGAGCAGTATACAATACTATTTGCTTCATTTTCATTTATTGC  
 GAATTACTGTTTTAATAAGGGTAACCATCTTTTAAACAATACTATTTGCTTCATTTTCATTTATTGC  
 LCR Chr7:6040351-6049558 Chr7:6043119-6043122

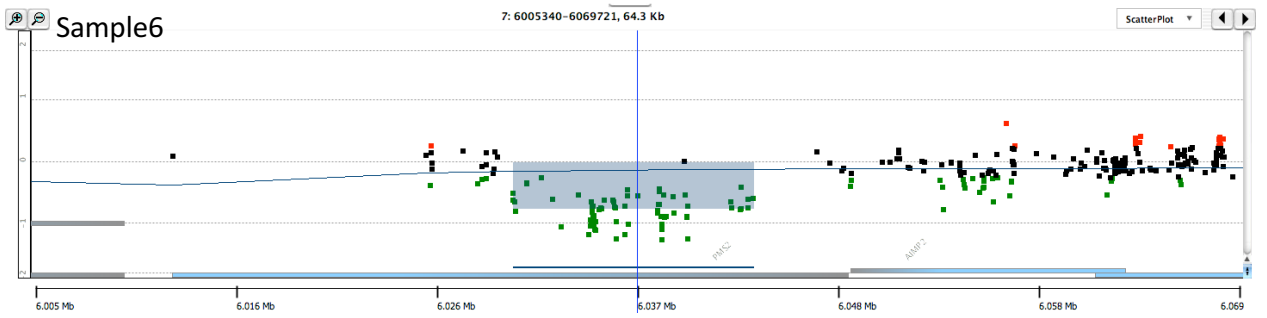

AluSx1 + Chr7:6030502-6030513  
 ACCCCGTCTCTACTAAAAACACAAAAAATTAGTCAGGCATGGTGGCAGGTGCCTGTAATCCGTGCTACTC  
 ACCCCGTCTCTACTAAAAACACAAAAAATTAGTCAGGCATGGTGGTGGGCACCTGTAATCCTAGCTACTC  
 ACCCCGTCTTTACTAAAAATACAAAAAATTAGTCAGGCATGGTGGTGGGCACCTGTAATCCTAGCTACTC  
 AluSq2 + Chr7:6046140-6046151

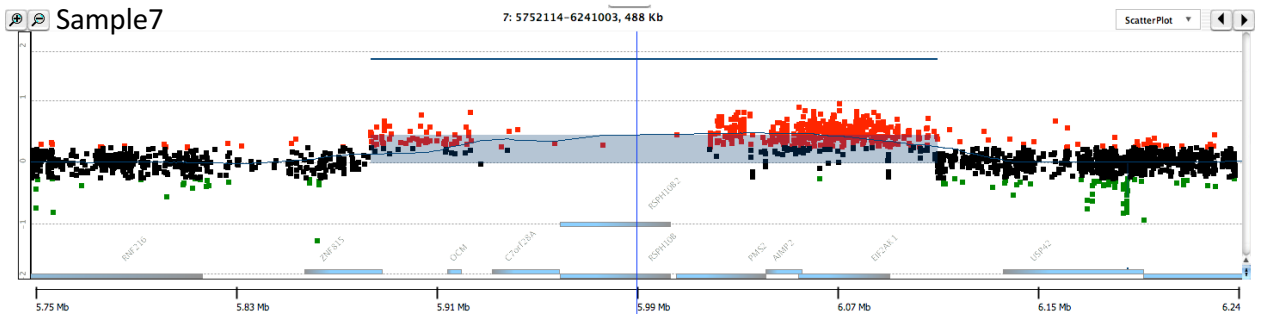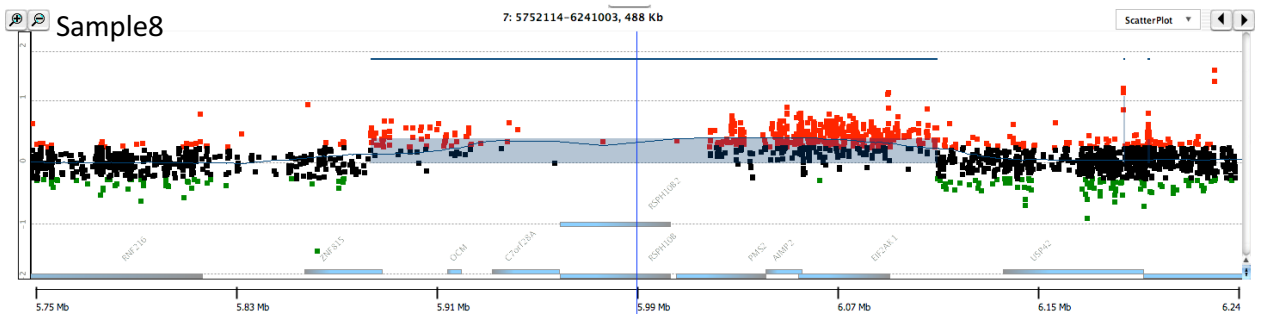

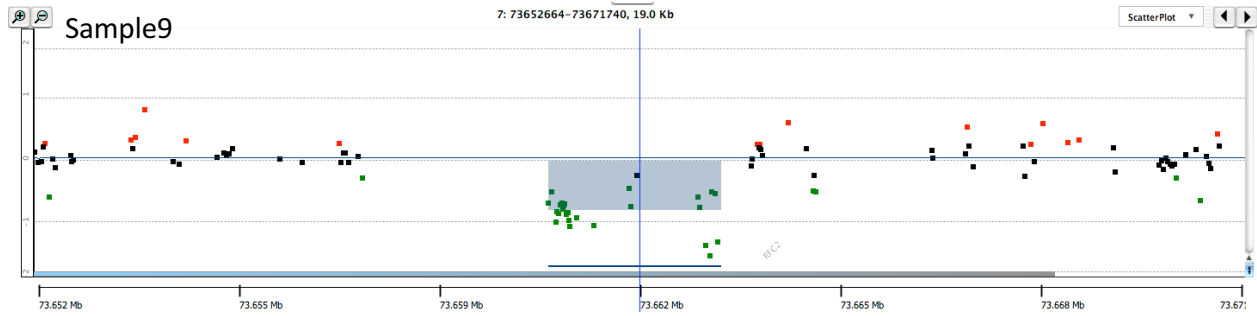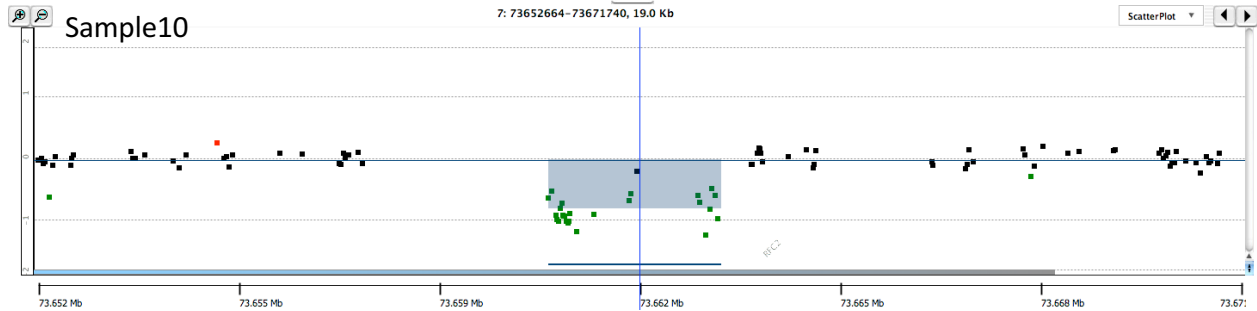

*AluSx* + Chr7:73660117-73660144  
 TAAAAAAATTTACAGGCCAGGCACAGTGGCTCACACCTATAATCCCAGCATTTTGGGAGGCCGAGGCCGGG  
 TAAAAAAATTTACAGGCCAGGCACAGTGGCTCACACCTATAATCCCAGCACTTTGGGAGGCCAAGGCCGGG  
*AluSx1* + Chr7:73663597-73663624  
 AGATCAATACAGCTGGCCGGAGACAGTGGCTCACACCTATAATCCCAGCACTTTGGGAGGCCAAGGCCGGG

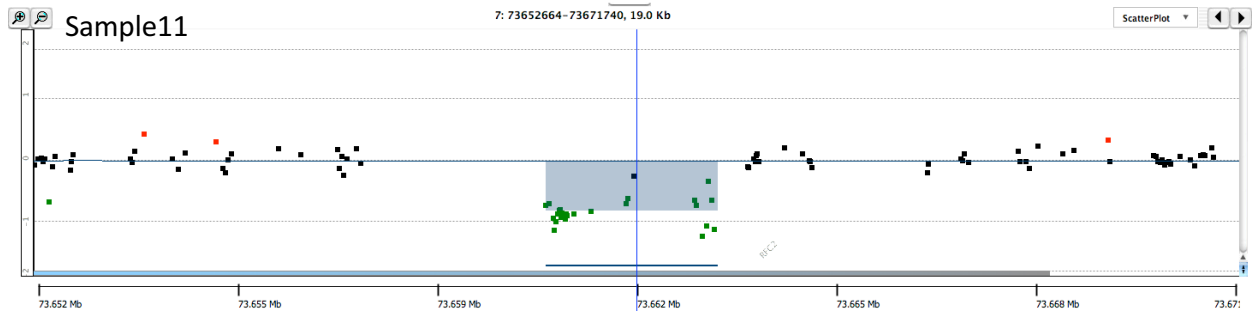

*AluSx* + Chr7:73660117-73660144  
 TAAAAAAATTTACAGGCCAGGCACAGTGGCTCACACCTATAATCCCAGCATTTTGGGAGGCCGAGGCCGGG  
 TAAAAAAATTTACAGGCCAGGCACAGTGGCTCACACCTATAATCCCAGCACTTTGGGAGGCCAAGGCCGGG  
*AluSx1* + Chr7:73663597-73663624  
 AGATCAATACAGCTGGCCGGAGACAGTGGCTCACACCTATAATCCCAGCACTTTGGGAGGCCAAGGCCGGG

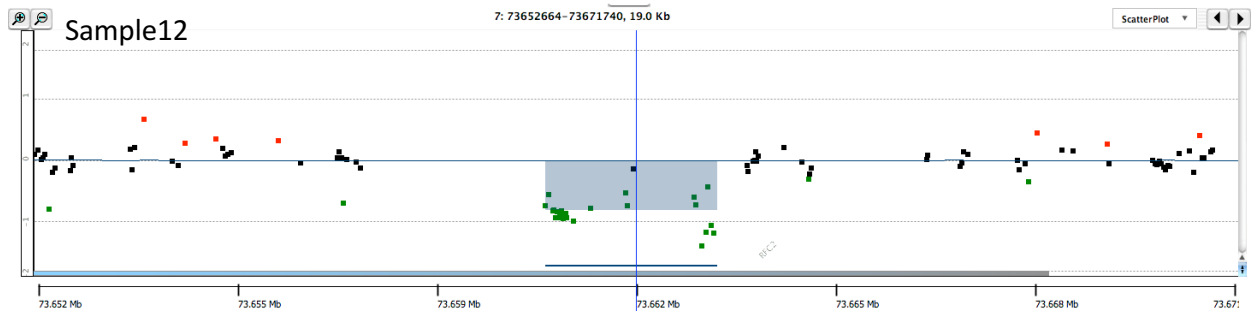

*AluSx* + Chr7:73660117-73660144  
 TAAAAAAATTTACAGGCCAGGCACAGTGGCTCACACCTATAATCCCAGCATTTTGGGAGGCCGAGGCCGGG  
 TAAAAAAATTTACAGGCCAGGCACAGTGGCTCACACCTATAATCCCAGCACTTTGGGAGGCCAAGGCCGGG  
*AluSx1* + Chr7:73663597-73663624  
 AGATCAATACAGCTGGCCGGAGACAGTGGCTCACACCTATAATCCCAGCACTTTGGGAGGCCAAGGCCGGG

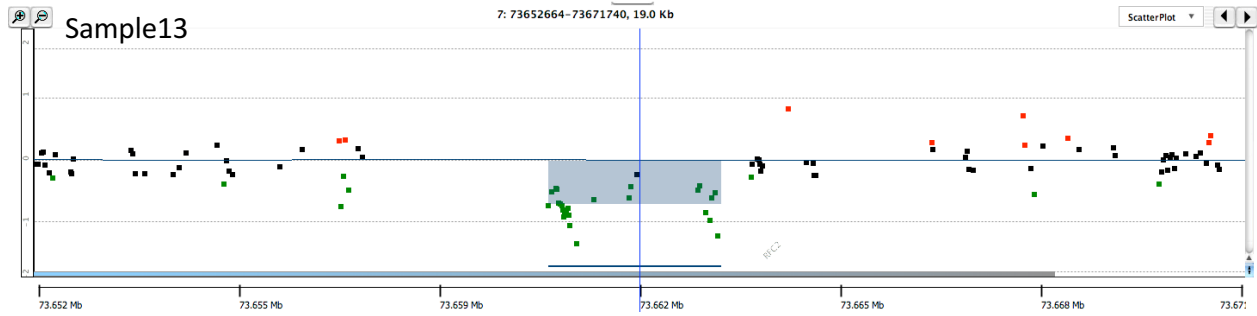

*AluSx* + Chr7:73660117-73660144  
 TAAAAAAATTTACAGGCCAGGCACAGTGGCTCACACCTATAATCCCAGCATTTTGGGAGGCCGAGGCCGGG  
 TAAAAAAATTTACAGGCCAGGCACAGTGGCTCACACCTATAATCCCAGCACTTTGGGAGGCCAAGGCCGGG  
*AluSx1* + Chr7:73663597-73663624  
 AGATCAATACAGCTGGCCGGAGACAGTGGCTCACACCTATAATCCCAGCACTTTGGGAGGCCAAGGCCGGG

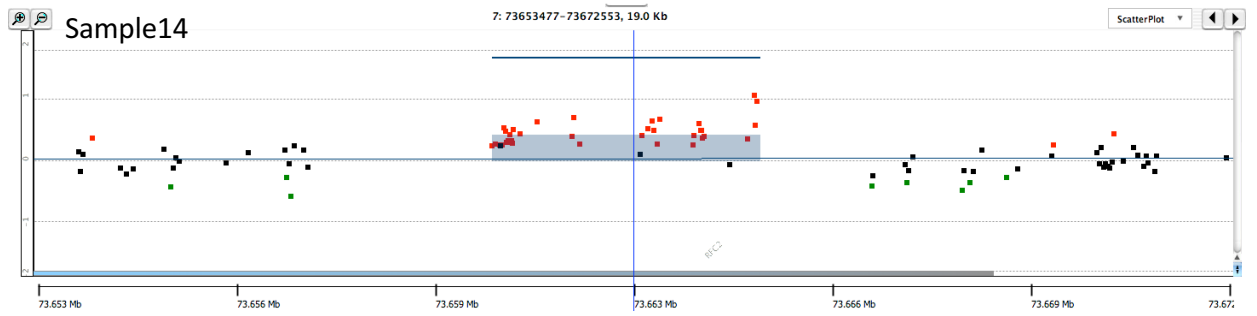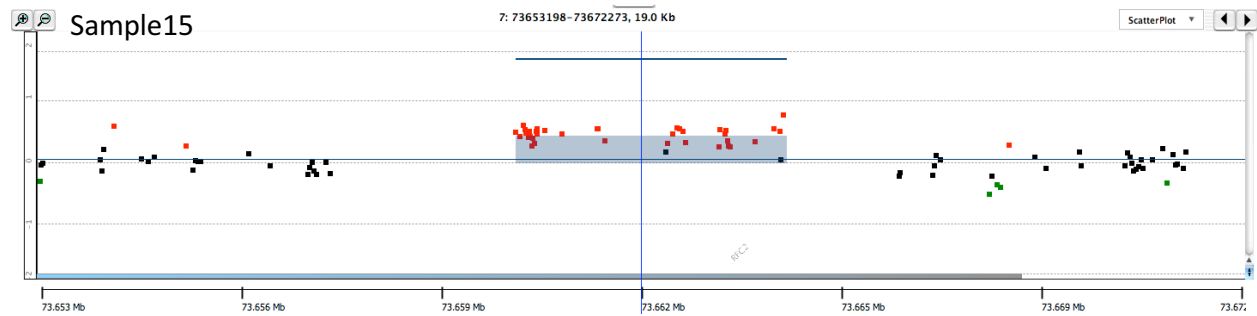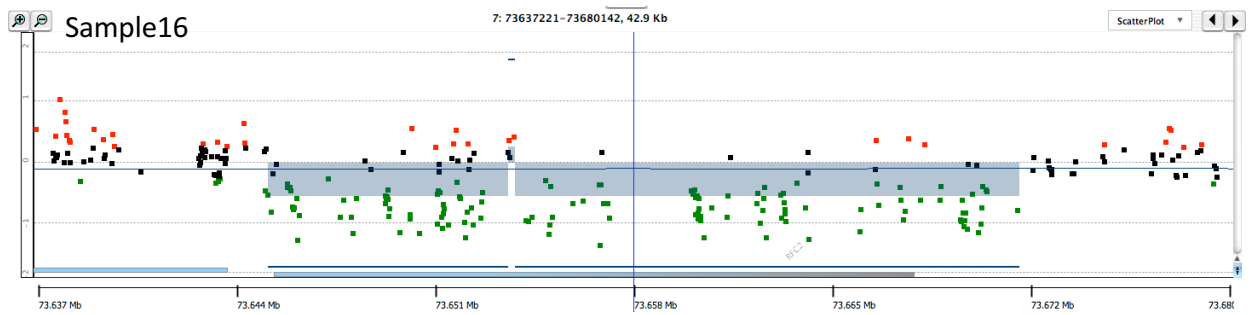

*AluSx* + Chr7:73645061-73645078  
 CTCCTGCCTCAGCCTCCTGAGTAGCTGGGATTACAGGCCGTGCGCCACCATGCCAGCTAATTTTCGTATTT  
 CTCCTGCCTCAGCCTCCTGAGTAGCTGGGATTACAGGCCGTGAGCCACTGCGCCAGCCCCATTTATGGTT  
*AluY* + Chr7:73672804-73672821  
 CACCCGCCTCGGCCGCCAAAGTGCTGGGATTACAGGCCGTGAGCCACTGCGCCAGCCCCATTTATGGTT

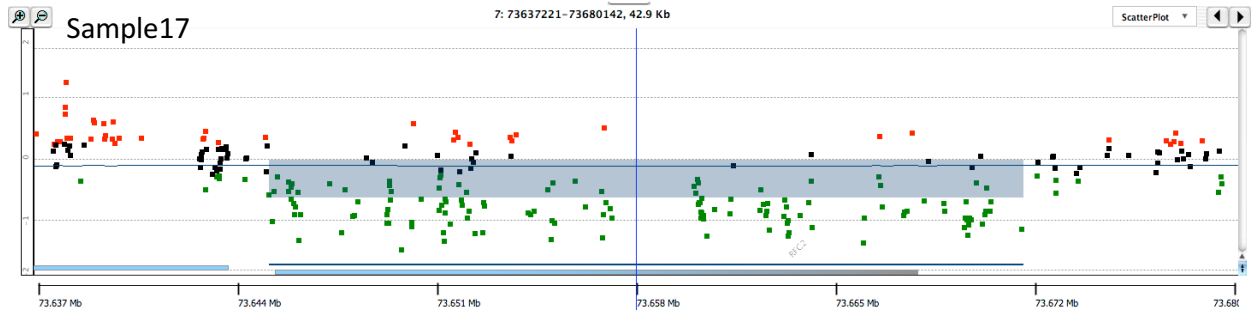

*AluSx* + Chr7:73645061-73645078  
 CTCCTGCCTCAGCCTCCTGAGTAGCTGGGATTACAGGCGTGCGCCACCATGCCAGCTAATTTTCGTATTT  
 CTCCTGCCTCAGCCTCCTGAGTAGCTGGGATTACAGGCGTAGCCACTGCGCCAGCCCCATTTATGGTT  
 CACCCGCCTCGGCCTCCCAAAGTCTGGGATTACAGGCGTAGCCACTGCGCCAGCCCCATTTATGGTT  
*AluY* + Chr7:73672804-73672821

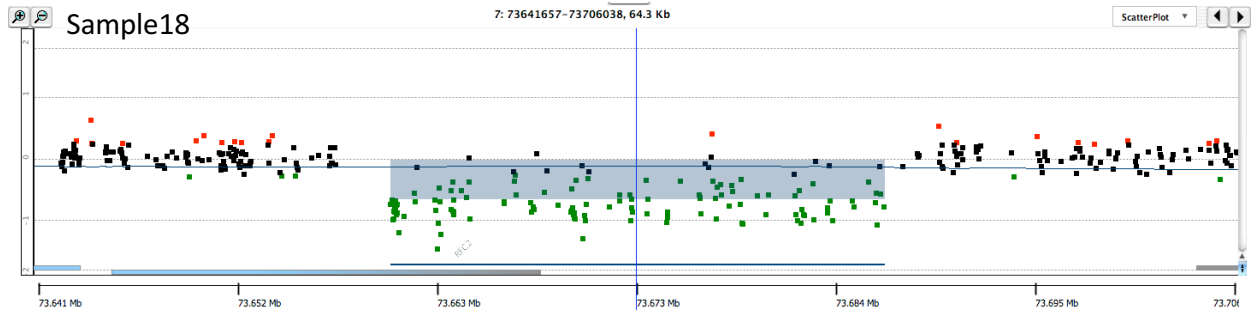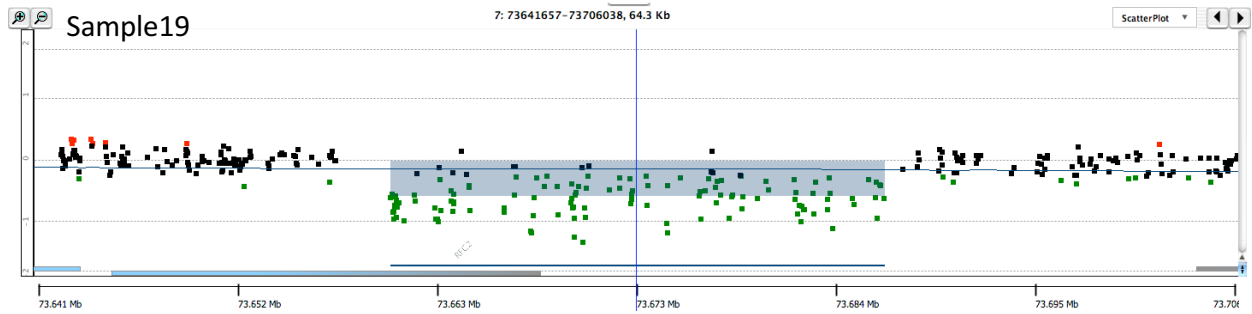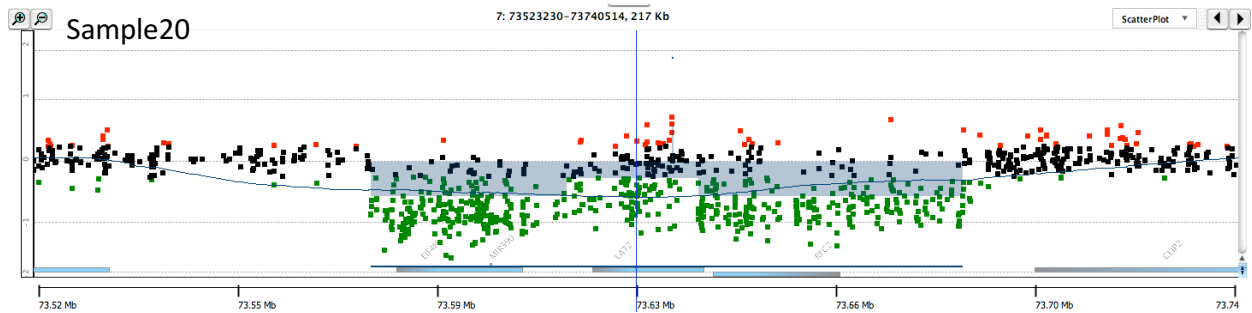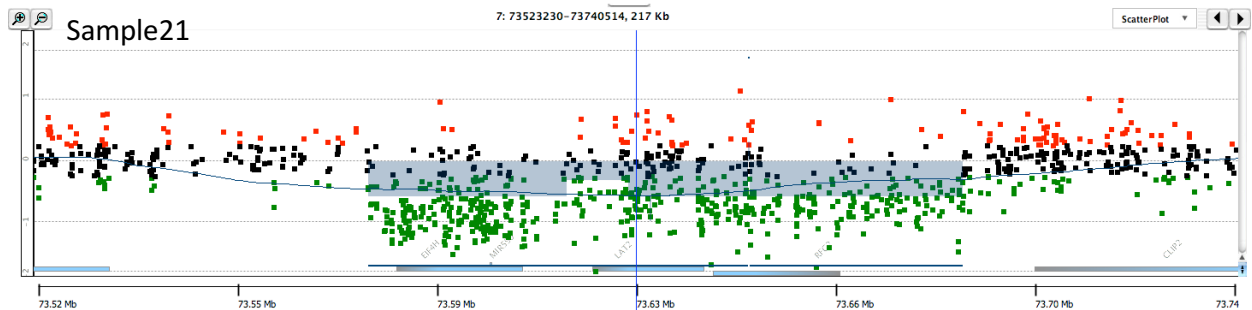

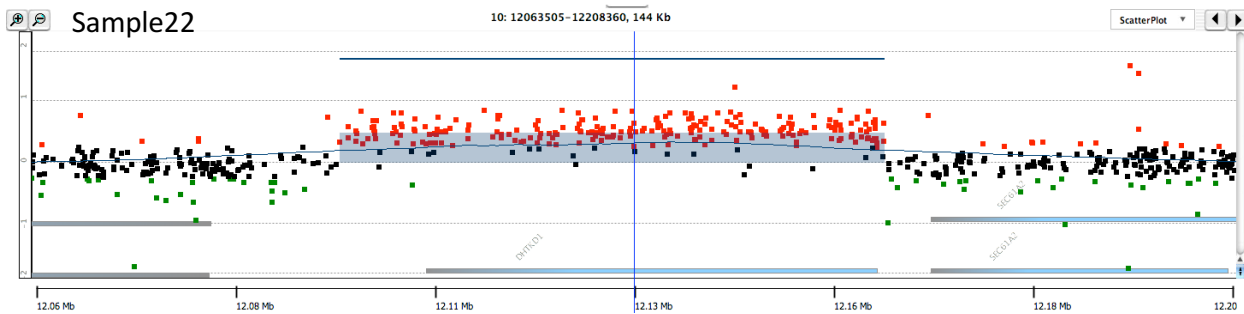

*AluSx* + Chr10:12166163-12166177  
 TGGCTCATGCTTGTAATCCCG**GCACTTTGGGAGGCT**AAGGTGGGCAGATCACCTGAGGTCAGGAGTTTGA  
 TGGCTCATGCTTGTAATCCCG**GCACTTTGGGAGGCT**GAGGCGGGCGGATCATGAGGTCAGGAGATCGAGA  
 TGGCTCATGCCTGTAATCCCA**GCACTTTGGGAGGCT**GAGGCGGGCGGATCATGAGGTCAGGAGATCGAGA  
*AluY* + Chr10:12100331-12100345

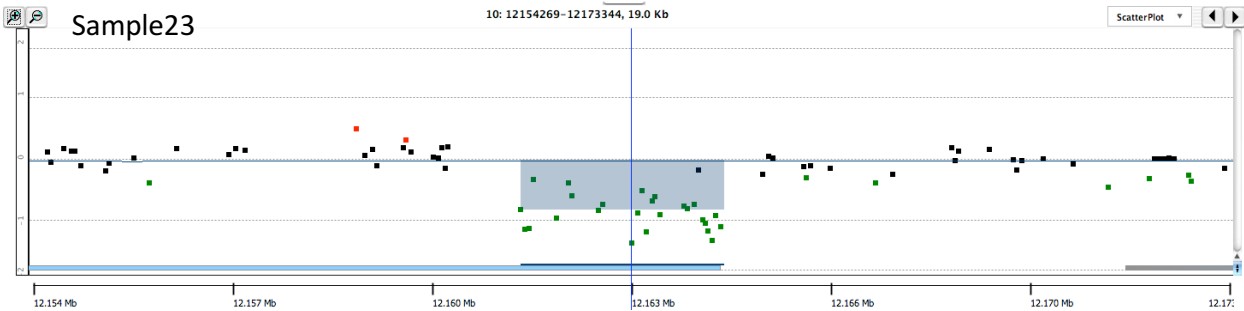

*AluSx* + Chr10:12161539-12161550  
 GCAGGAGAATGGCGTGAACCC**GGGAGGCGGAGCT**TGCAGTGAGCCGAGATTGCGCTACTGCACTCCAGCC  
 GCAGGAGAATGGCGTGAACCC**GGGAGGCGGAGG**TTCAGTGAGCCGAGATCGCACCCTGTACTCCAGCC  
 GCAGGAGAATCACTTGATCT**GGGAGGCGGAGG**TTCAGTGAGCCGAGATTGCACCCTGTACTCCAGCC  
*AluY* + Chr10:12165521-12165532 C,rs12784869

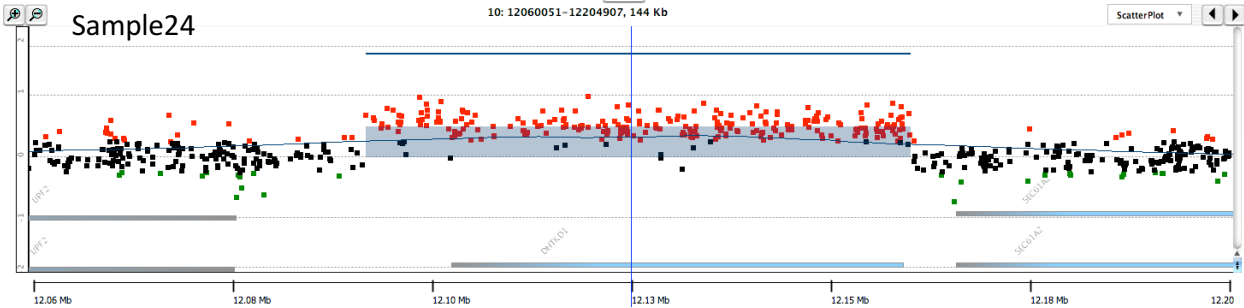

*AluSx* + Chr10:12166163-12166177  
 TGGCTCATGCTTGTAATCCCG**GCACTTTGGGAGGCT**AAGGTGGGCAGATCACCTGAGGTCAGGAGTTTGA  
 TGGCTCATGCTTGTAATCCCG**GCACTTTGGGAGGCT**GAGGCGGGCGGATCATGAGGTCAGGAGATCGAGA  
 TGGCTCATGCCTGTAATCCCA**GCACTTTGGGAGGCT**GAGGCGGGCGGATCATGAGGTCAGGAGATCGAGA  
*AluY* + Chr10:12100331-12100345

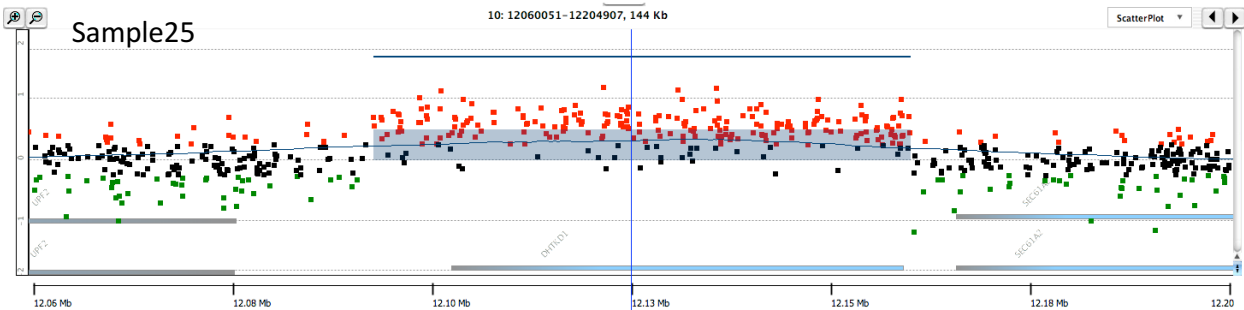

*AluSx* + Chr10:12166163-12166177  
 TGGCTCATGCTTGTAATCCCG**GCACTTTGGGAGGCT**AAGGTGGGCAGATCACCTGAGGTCAGGAGTTTGA  
 TGGCTCATGCTTGTAATCCCG**GCACTTTGGGAGGCT**GAGGCGGGCGGATCATGAGGTCAGGAGATCGAGA  
 TGGCTCATGCCTGTAATCCCA**GCACTTTGGGAGGCT**GAGGCGGGCGGATCATGAGGTCAGGAGATCGAGA  
*AluY* + Chr10:12100331-12100345

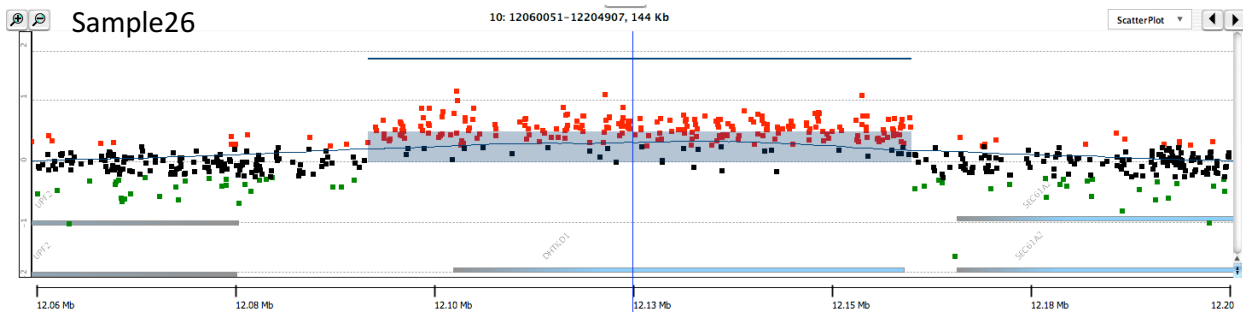

Sample26  
10: 12060051-12204907, 144 Kb

*AluSx* + Chr10:12166163-12166177  
 TGGCTCATGCTTGTAATCCCGGCACTTTGGGAGGCTAAGGTGGGCAGATCACCTGAGGTCAGGAGTTTGA  
 TGGCTCATGCTTGTAATCCCGGCACTTTGGGAGGCTGAGGCGGGCGGATCATGAGGTCAGGAGATCGAGA  
 TGGCTCATGCCTGTAATCCCAAGCACTTTGGGAGGCTGAGGCGGGCGGATCATGAGGTCAGGAGATCGAGA  
*AluY* + Chr10:12100331-12100345

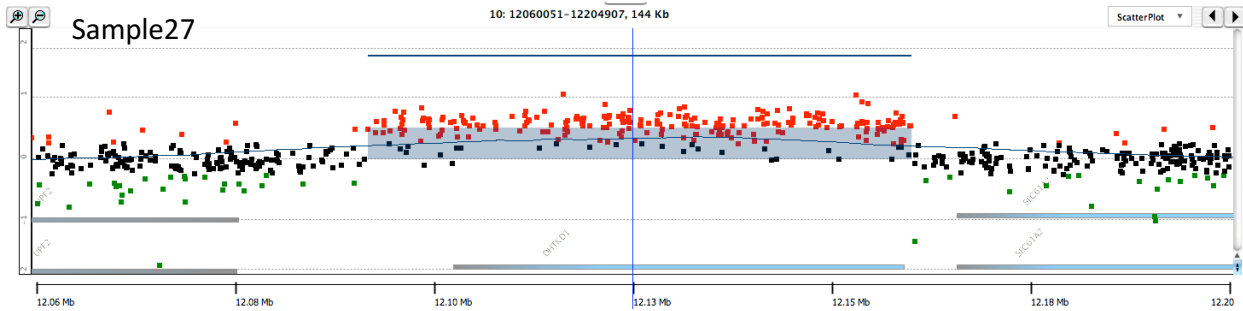

Sample27  
10: 12060051-12204907, 144 Kb

*AluSx* + Chr10:12166163-12166177  
 TGGCTCATGCTTGTAATCCCGGCACTTTGGGAGGCTAAGGTGGGCAGATCACCTGAGGTCAGGAGTTTGA  
 TGGCTCATGCTTGTAATCCCGGCACTTTGGGAGGCTGAGGCGGGCGGATCATGAGGTCAGGAGATCGAGA  
 TGGCTCATGCCTGTAATCCCAAGCACTTTGGGAGGCTGAGGCGGGCGGATCATGAGGTCAGGAGATCGAGA  
*AluY* + Chr10:12100331-12100345

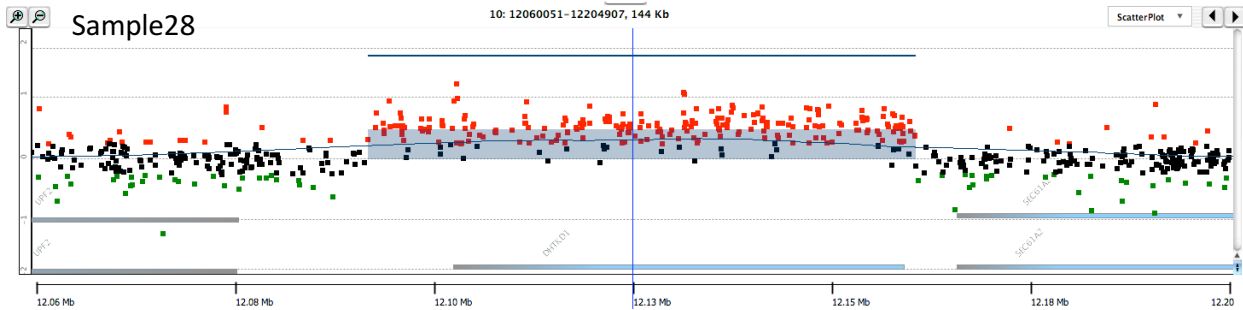

Sample28  
10: 12060051-12204907, 144 Kb

*AluSx* + Chr10:12166163-12166177  
 TGGCTCATGCTTGTAATCCCGGCACTTTGGGAGGCTAAGGTGGGCAGATCACCTGAGGTCAGGAGTTTGA  
 TGGCTCATGCTTGTAATCCCGGCACTTTGGGAGGCTGAGGCGGGCGGATCATGAGGTCAGGAGATCGAGA  
 TGGCTCATGCCTGTAATCCCAAGCACTTTGGGAGGCTGAGGCGGGCGGATCATGAGGTCAGGAGATCGAGA  
*AluY* + Chr10:12100331-12100345

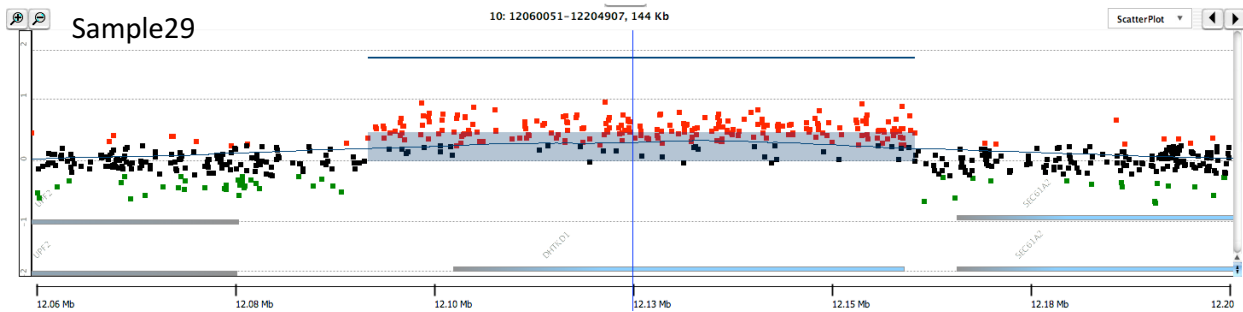

Sample29  
10: 12060051-12204907, 144 Kb

*AluSx* + Chr10:12166163-12166177  
 TGGCTCATGCTTGTAATCCCGGCACTTTGGGAGGCTAAGGTGGGCAGATCACCTGAGGTCAGGAGTTTGA  
 TGGCTCATGCTTGTAATCCCGGCACTTTGGGAGGCTGAGGCGGGCGGATCATGAGGTCAGGAGATCGAGA  
 TGGCTCATGCCTGTAATCCCAAGCACTTTGGGAGGCTGAGGCGGGCGGATCATGAGGTCAGGAGATCGAGA  
*AluY* + Chr10:12100331-12100345



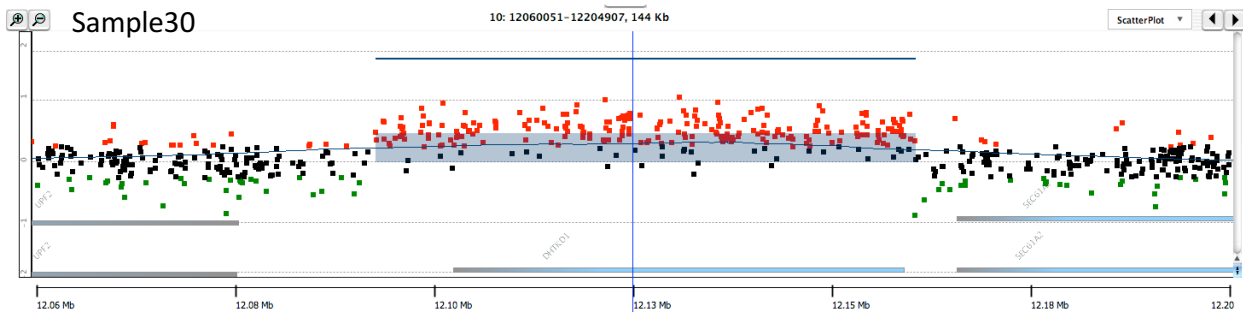

Sample30 10: 12060051-12204907, 144 Kb ScatterPlot

*AluSx* + Chr10:12166163-12166177  
 TGGCTCATGCTTGTAATCCCG**GCACTTTGGGAGGCT**AAGGTGGGCAGATCACCTGAGGTCAGGAGTTTGA  
 TGGCTCATGCTTGTAATCCCG**GCACTTTGGGAGGCT**GAGGCGGGCGGATCATGAGGTCAGGAGATCGAGA  
 TGGCTCATGCCTGTAATCCCA**GCACTTTGGGAGGCT**GAGGCGGGCGGATCATGAGGTCAGGAGATCGAGA  
*AluY* + Chr10:12100331-12100345

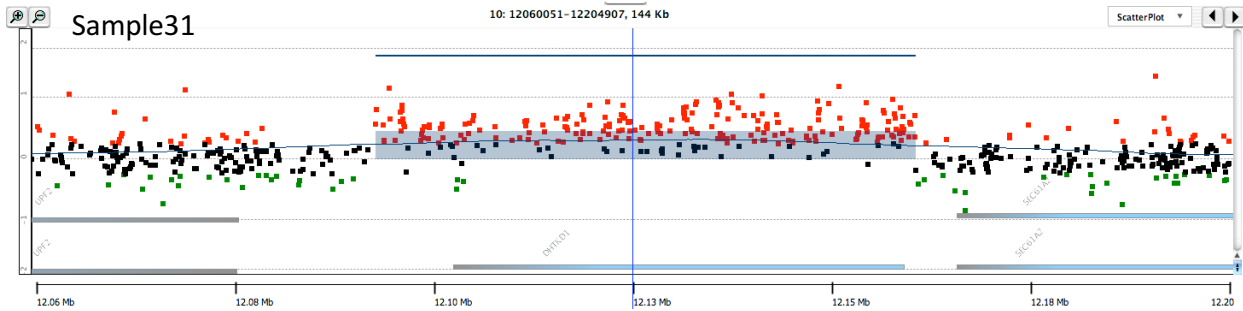

Sample31 10: 12060051-12204907, 144 Kb ScatterPlot

*AluSx* + Chr10:12166163-12166177  
 TGGCTCATGCTTGTAATCCCG**GCACTTTGGGAGGCT**AAGGTGGGCAGATCACCTGAGGTCAGGAGTTTGA  
 TGGCTCATGCTTGTAATCCCG**GCACTTTGGGAGGCT**GAGGCGGGCGGATCATGAGGTCAGGAGATCGAGA  
 TGGCTCATGCCTGTAATCCCA**GCACTTTGGGAGGCT**GAGGCGGGCGGATCATGAGGTCAGGAGATCGAGA  
*AluY* + Chr10:12100331-12100345

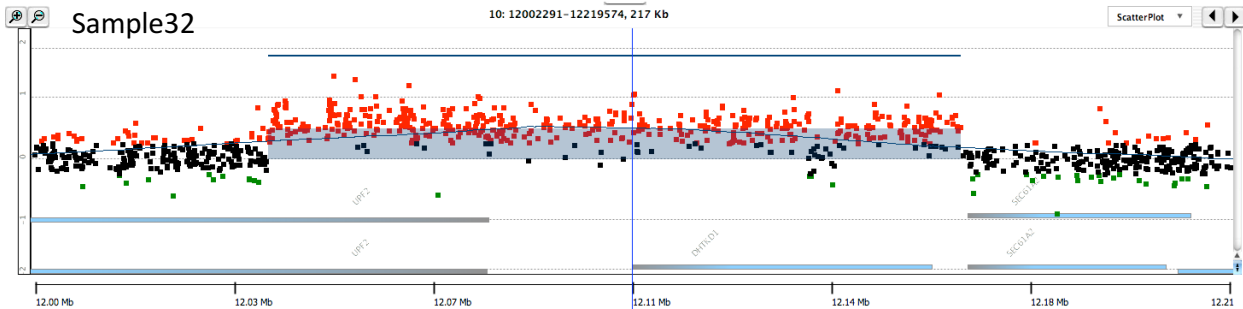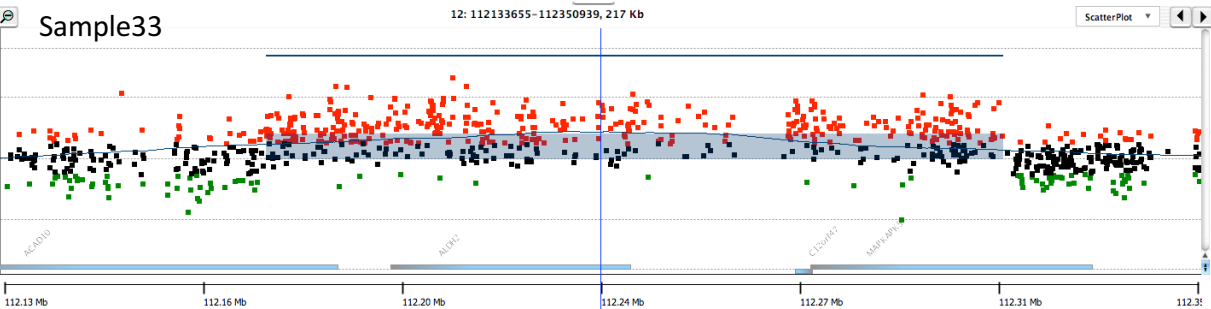

Sample33 12: 112133655-112350939, 217 Kb ScatterPlot

*AluJb* - Chr12:112315744-112315754  
 TCTGGGCTCAAGTGATCCTCCTG**CCTCAGCCTCC**TAACTTGCTGGGATTACAGGCATGATCTACCACGTC  
 TCTGGGCTCAAGTGATCCTCCTG**CCTCAGCCTCC**CAAAGTGCTGGGGTTACAGGCGTGAGCCAAAGCACC  
 ACTGACCTCCAGTAATCCACCCA**CCTCAGCCTCC**CAAAGTGCTGGGGTTACAGGCGTGAGCCAAAGCACC  
*AluSq2* - Chr12:112180759-112180769

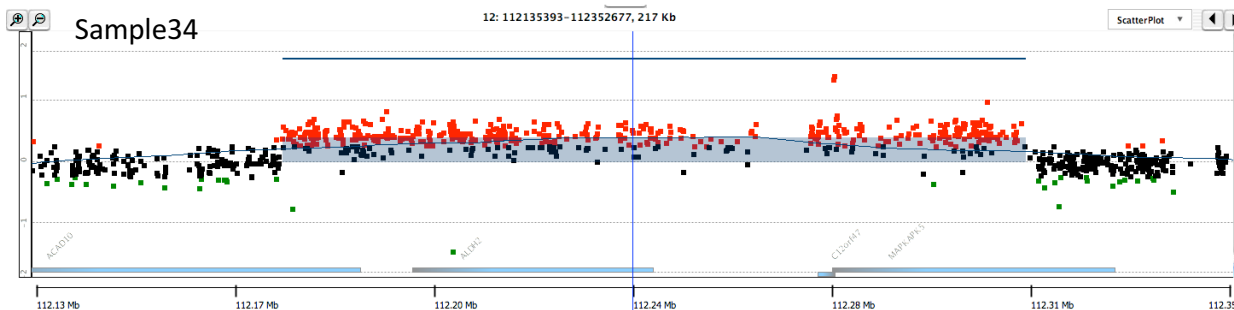

Sample34  
 12: 112135393 - 112352677, 217 Kb  
 AluJb - Chr12:112315744-112315754  
 TCTGGGCTCAAGTGATCCTCCTG**CCTCAGCCTCC**TAACTTGCTGGGATTACAGGCATGATCTACCACGTC  
 TCTGGGCTCAAGTGATCCTCCTG**CCTCAGCCTCC**CAAAGTGCTGGGGTTACAGGCGTGAGCCAAAGCACC  
 ACTGACCTCCAGTAATCCACCCA**CCTCAGCCTCC**CAAAGTGCTGGGGTTACAGGCGTGAGCCAAAGCACC  
 AluSq2 - Chr12:112180759-112180769

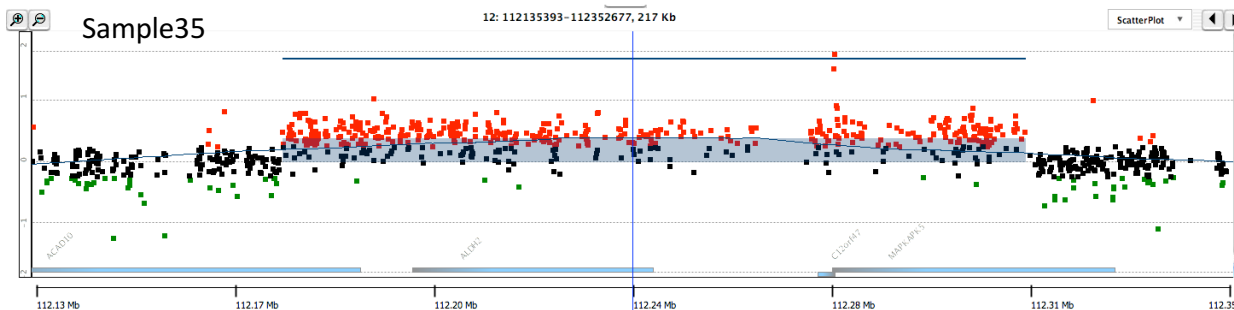

Sample35  
 12: 112135393 - 112352677, 217 Kb  
 AluJb - Chr12:112315744-112315754  
 TCTGGGCTCAAGTGATCCTCCTG**CCTCAGCCTCC**TAACTTGCTGGGATTACAGGCATGATCTACCACGTC  
 TCTGGGCTCAAGTGATCCTCCTG**CCTCAGCCTCC**CAAAGTGCTGGGGTTACAGGCGTGAGCCAAAGCACC  
 ACTGACCTCCAGTAATCCACCCA**CCTCAGCCTCC**CAAAGTGCTGGGGTTACAGGCGTGAGCCAAAGCACC  
 AluSq2 - Chr12:112180759-112180769

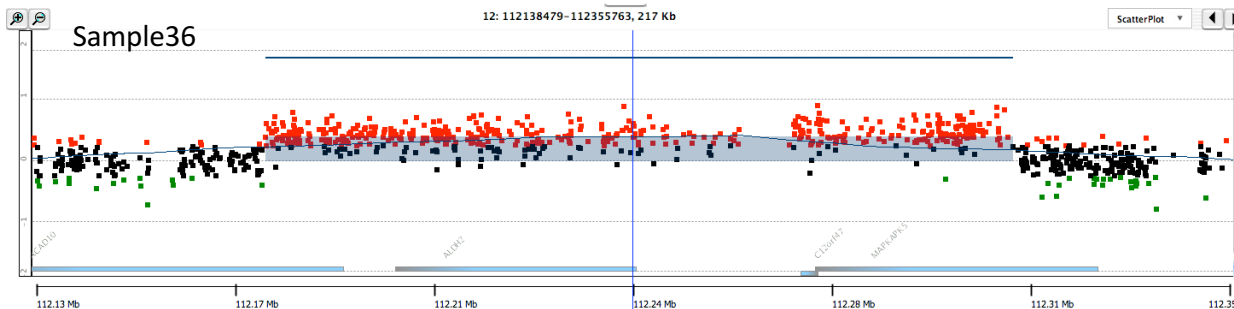

Sample36  
 12: 112138479 - 112355763, 217 Kb  
 AluJb - Chr12:112315744-112315754  
 TCTGGGCTCAAGTGATCCTCCTG**CCTCAGCCTCC**TAACTTGCTGGGATTACAGGCATGATCTACCACGTC  
 TCTGGGCTCAAGTGATCCTCCTG**CCTCAGCCTCC**CAAAGTGCTGGGGTTACAGGCGTGAGCCAAAGCACC  
 ACTGACCTCCAGTAATCCACCCA**CCTCAGCCTCC**CAAAGTGCTGGGGTTACAGGCGTGAGCCAAAGCACC  
 AluSq2 - Chr12:112180759-112180769

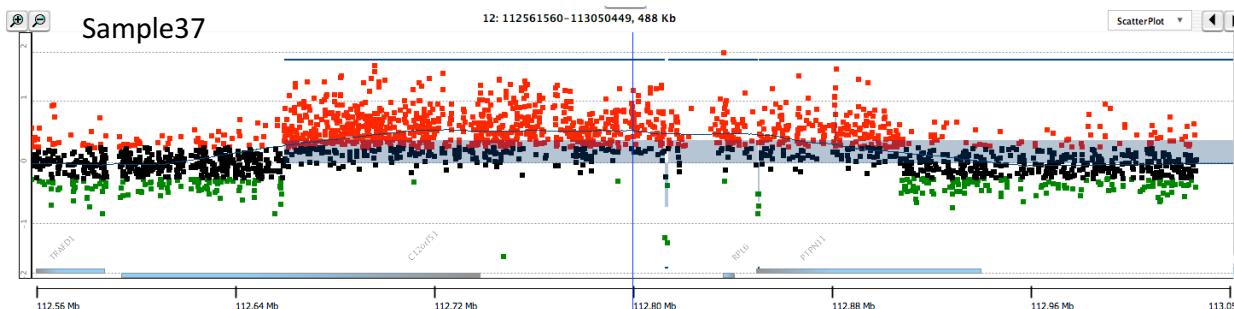

Sample37  
 12: 112561560 - 113050449, 488 Kb  
 AluJb - Chr12:112315744-112315754  
 TCTGGGCTCAAGTGATCCTCCTG**CCTCAGCCTCC**TAACTTGCTGGGATTACAGGCATGATCTACCACGTC  
 TCTGGGCTCAAGTGATCCTCCTG**CCTCAGCCTCC**CAAAGTGCTGGGGTTACAGGCGTGAGCCAAAGCACC  
 ACTGACCTCCAGTAATCCACCCA**CCTCAGCCTCC**CAAAGTGCTGGGGTTACAGGCGTGAGCCAAAGCACC  
 AluSq2 - Chr12:112180759-112180769

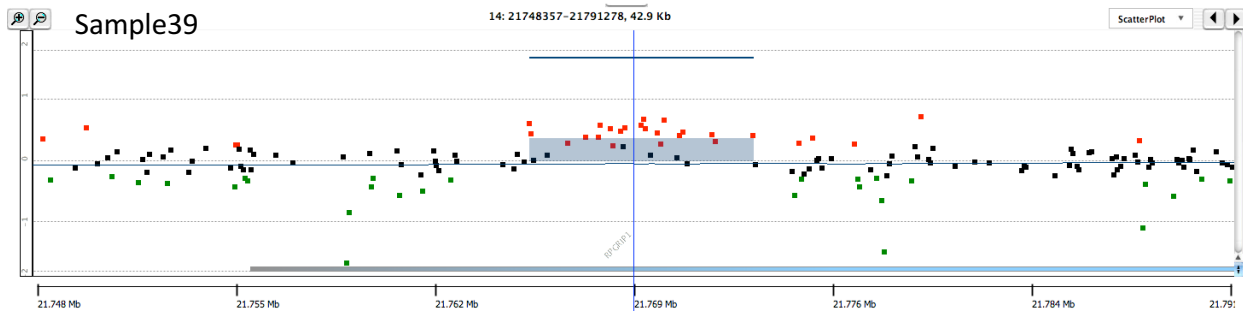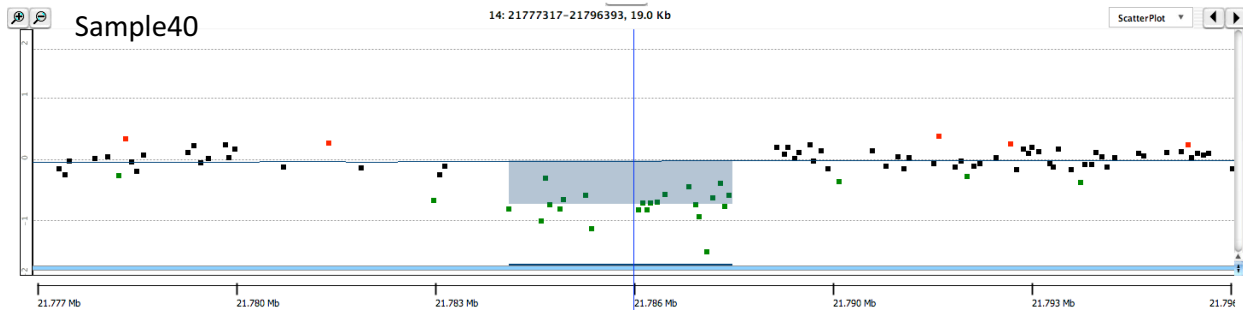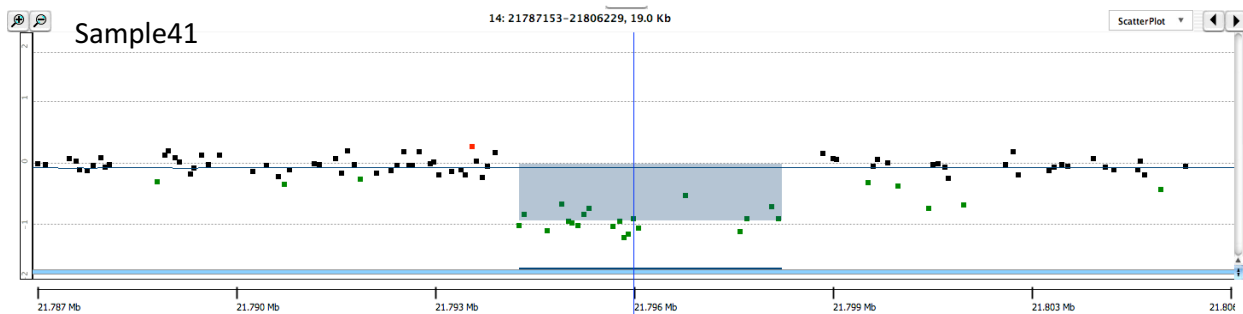

*AluSp* - Chr14:21794781-21794806  
 GACCTCAGGTGAACCTCCCACCTGAGCCTCCCAAAGTGCTGGGATTACAGACGTGAGCCACCGCGCCTGG  
 GACCTCAGGTGAACCTCCCACCTGAGCCTCCCAAAGTGCTGGGATTACAGGCGTGAGCCACTGCACCCGA  
 GACCTTAGGTGATCCGCCACCTCAGCCTCCCAAAGTGCTGGGATTACAGGCGTGAGCCACTGCACCCGA  
*AluSx* - Chr14:21799320-21799345

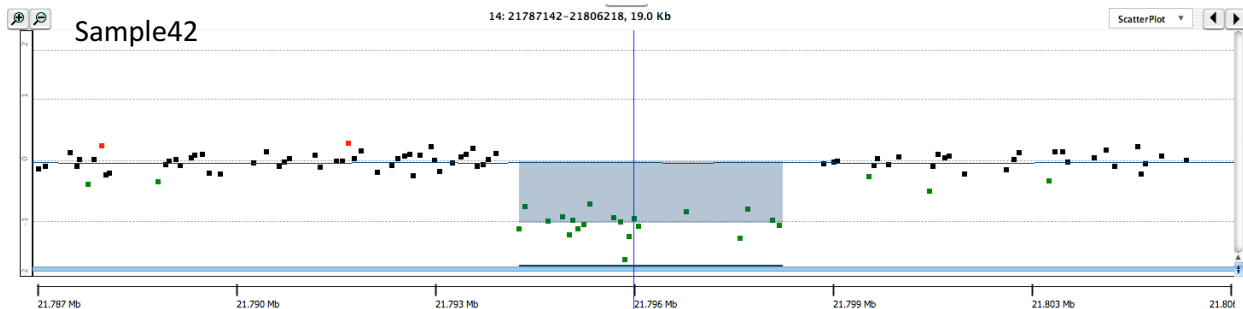

*AluSp* - Chr14:21794781-21794806  
 GACCTCAGGTGAACCTCCCACCTGAGCCTCCCAAAGTGCTGGGATTACAGACGTGAGCCACCGCGCCTGG  
 GACCTCAGGTGAACCTCCCACCTGAGCCTCCCAAAGTGCTGGGATTACAGGCGTGAGCCACTGCACCCGA  
 GACCTTAGGTGATCCGCCACCTCAGCCTCCCAAAGTGCTGGGATTACAGGCGTGAGCCACTGCACCCGA  
*AluSx* - Chr14:21799320-21799345

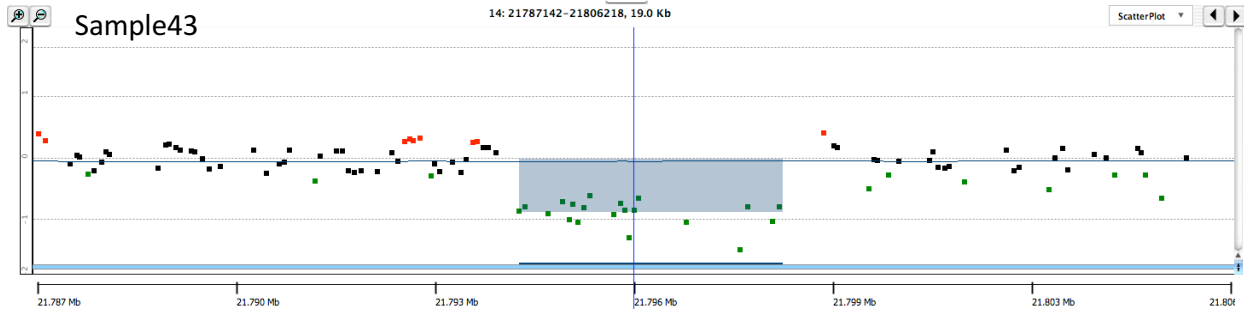

Sample43  
 14: 21787142 - 21806218, 19.0 Kb  
 AluSp - Chr14:21794781-21794806  
 GACCTCAGGTGAACCTCCCACCTGAGCCTCCCAAAGTGCTGGGATTACAGACGTGAGCCACCGCGCCTGG  
 GACCTCAGGTGAACCTCCCACCTGAGCCTCCCAAAGTGCTGGGATTACAGGCGTGAGCCACTGCACCCGA  
 GACCTTAGGTGATCCGCCACCTCAGCCTCCCAAAGTGCTGGGATTACAGGCGTGAGCCACTGCACCCGA  
 AluSx - Chr14:21799320-21799345

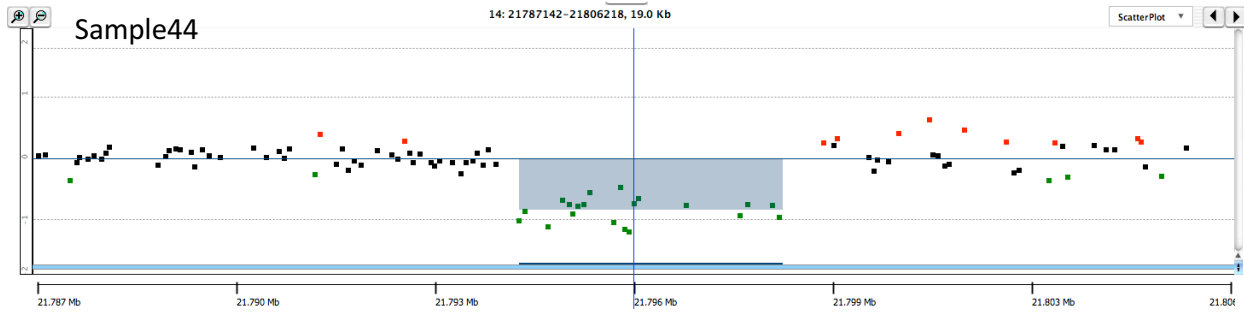

Sample44  
 14: 21787142 - 21806218, 19.0 Kb  
 AluSp - Chr14:21794781-21794806  
 GACCTCAGGTGAACCTCCCACCTGAGCCTCCCAAAGTGCTGGGATTACAGACGTGAGCCACCGCGCCTGG  
 GACCTCAGGTGAACCTCCCACCTGAGCCTCCCAAAGTGCTGGGATTACAGGCGTGAGCCACTGCACCCGA  
 GACCTTAGGTGATCCGCCACCTCAGCCTCCCAAAGTGCTGGGATTACAGGCGTGAGCCACTGCACCCGA  
 AluSx - Chr14:21799320-21799345

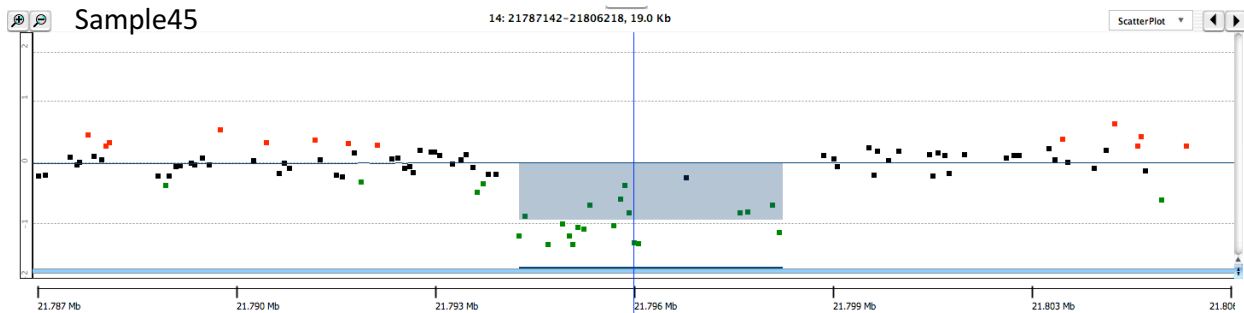

Sample45  
 14: 21787142 - 21806218, 19.0 Kb  
 AluSp - Chr14:21794781-21794806  
 GACCTCAGGTGAACCTCCCACCTGAGCCTCCCAAAGTGCTGGGATTACAGACGTGAGCCACCGCGCCTGG  
 GACCTCAGGTGAACCTCCCACCTGAGCCTCCCAAAGTGCTGGGATTACAGGCGTGAGCCACTGCACCCGA  
 GACCTTAGGTGATCCGCCACCTCAGCCTCCCAAAGTGCTGGGATTACAGGCGTGAGCCACTGCACCCGA  
 AluSx - Chr14:21799320-21799345

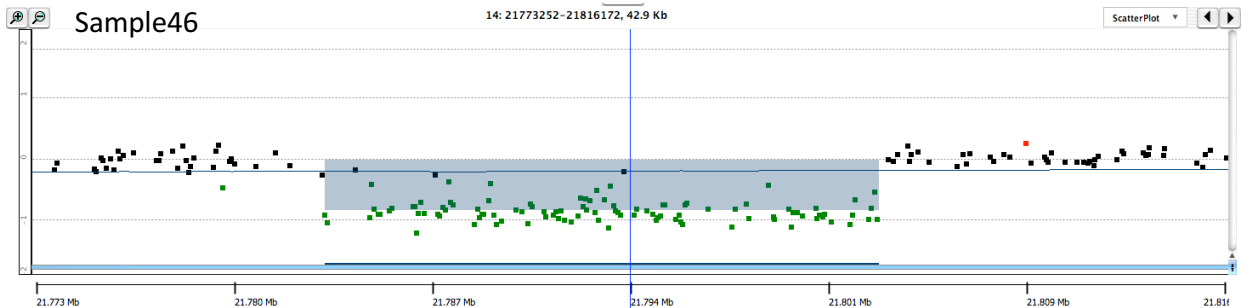

Sample46  
 14: 21773252 - 21816172, 42.9 Kb

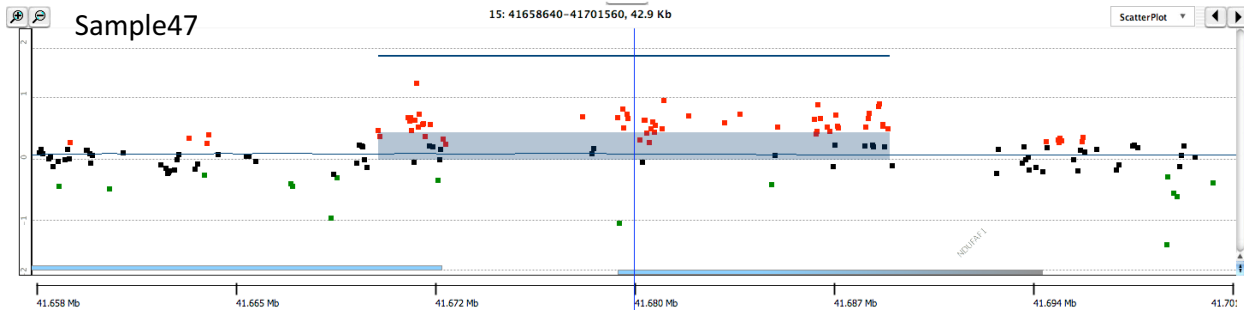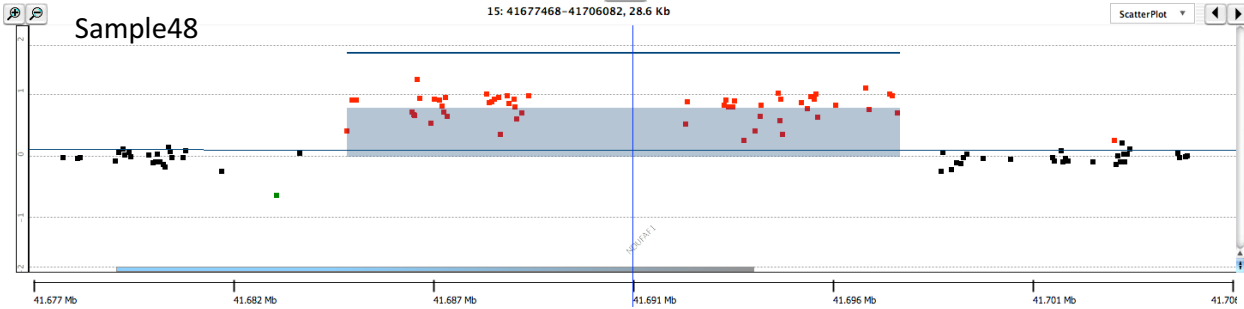

*AluSq2* - Chr15:41698386-41698406  
 TTGGTCAGGCTAGTCTGC **AACTCCTGACCTCAGGTGATC** CACCCGCCTCAGCCTCCCAAAGTGCTGGGAT  
 TTGGTCAGGCTAGTCTGC **AACTCCTGACCTCAGGTGATC** TGCCCATCTCAGCCTCCCAAAGTGCTGGGAT  
*AluSx3* - Chr15:41684493-41684513  
 TAGACCAGGCTGGTCTCA **AACTCCTGACCTCAAGTGATC** TGCCCATCTCAGCCTCCCAAAGTGCTGGGAT

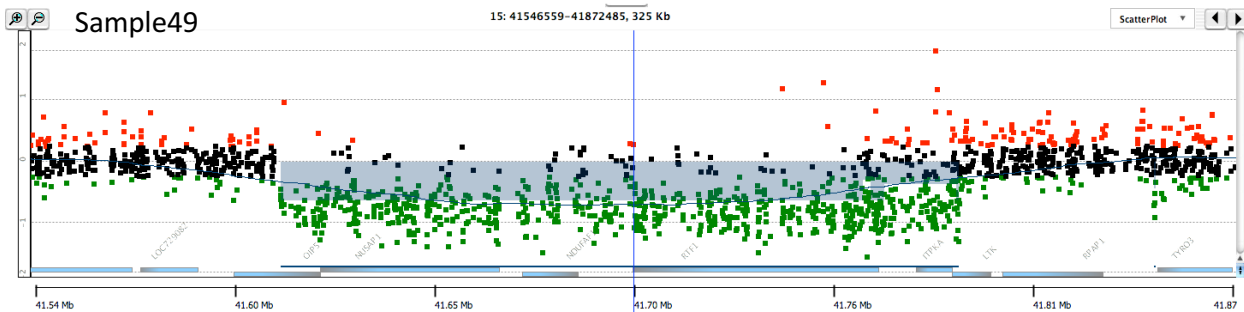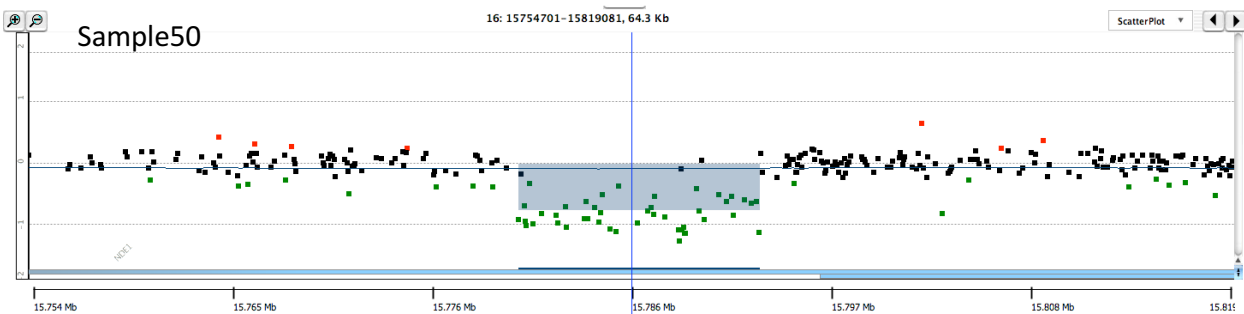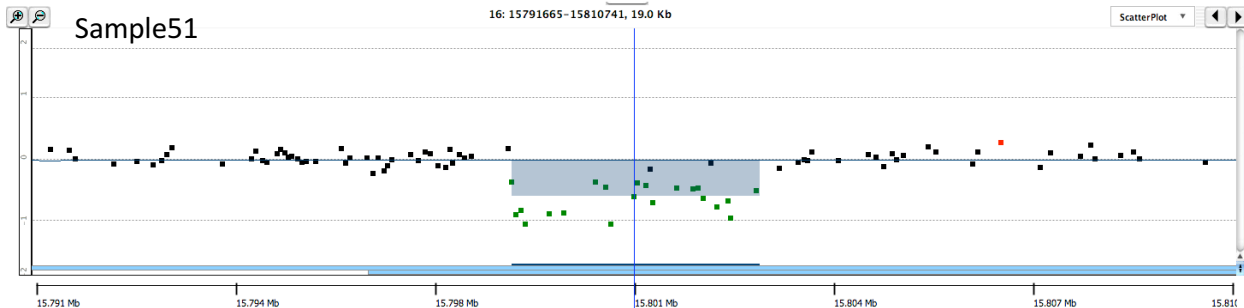

Chr16:15799291-15799291  
 TGGTCACGTGAGGGGAGACTTTGGGTAGGAGGAAGA **GAGTGGGCAGAAGAAGGAAAAATCAGATCTGCCT**  
 TGGTCACGTGAGGGGAGACTTTGGGTAGGAGGAAGATTACAGGGATTACAGGTGTGAGCCACTGCACCCG  
 TGACCTCAAGTGATCCACCCACCTCGGCCTCCCAAAGAGC **TGGGATTACAGGTGTGAGCCACTGCACCCG**  
*AluSz* - Chr16:15803439-15803439

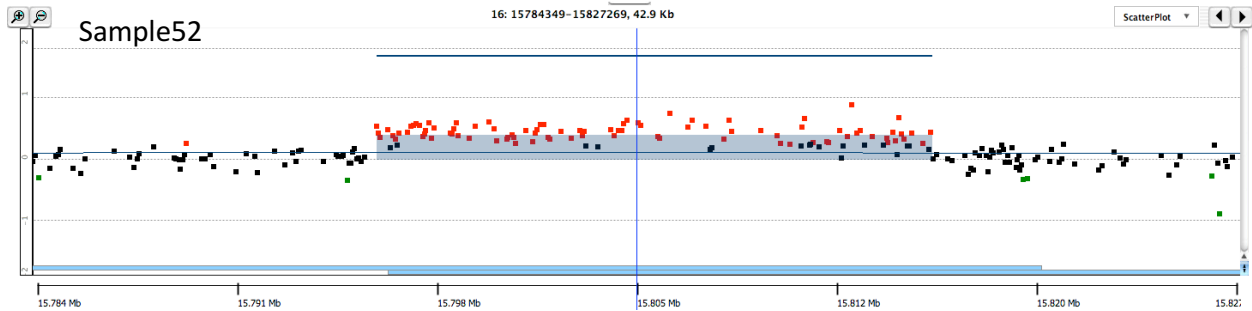

16: 15784349-15827269, 42.9 Kb

Chr16:15816331-15816331  
 AGCCAAACTTCCAGTATTCAGCAAAGACAGGGACCTCTAAATGGCACAGTCAACACAAAAATCCCACACT  
 AGCCAAACTTCCAGTATTCAGCAAAGTATTCAGCCAGTATTCCTGGCTCACATGATCCTCCTGCCTTAGC  
 CAGTGCAGTGGCGTGATCATAGCTCACTGCAGCCTGGAACTCCTGGCTCACATGATCCTCCTGCCTTAGC  
 AluJr - Chr16:15796336-15796336

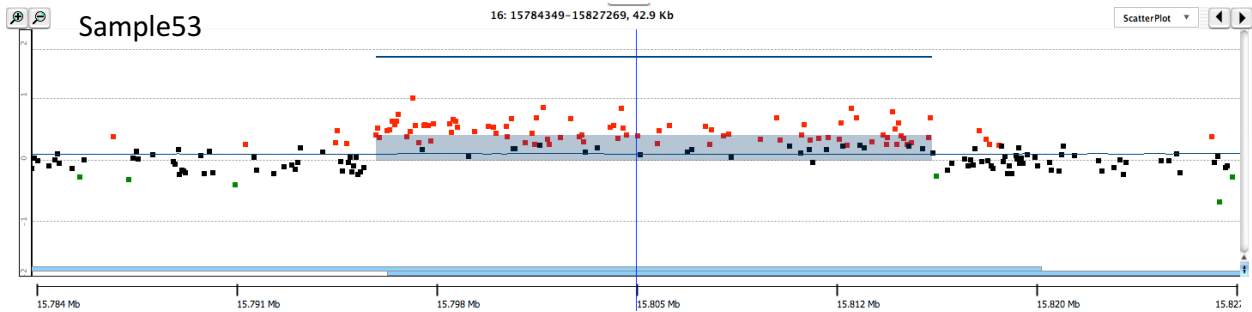

16: 15784349-15827269, 42.9 Kb

Chr16:15816331-15816331  
 AGCCAAACTTCCAGTATTCAGCAAAGACAGGGACCTCTAAATGGCACAGTCAACACAAAAATCCCACACT  
 AGCCAAACTTCCAGTATTCAGCAAAGTATTCAGCCAGTATTCCTGGCTCACATGATCCTCCTGCCTTAGC  
 CAGTGCAGTGGCGTGATCATAGCTCACTGCAGCCTGGAACTCCTGGCTCACATGATCCTCCTGCCTTAGC  
 AluJr - Chr16:15796336-15796336

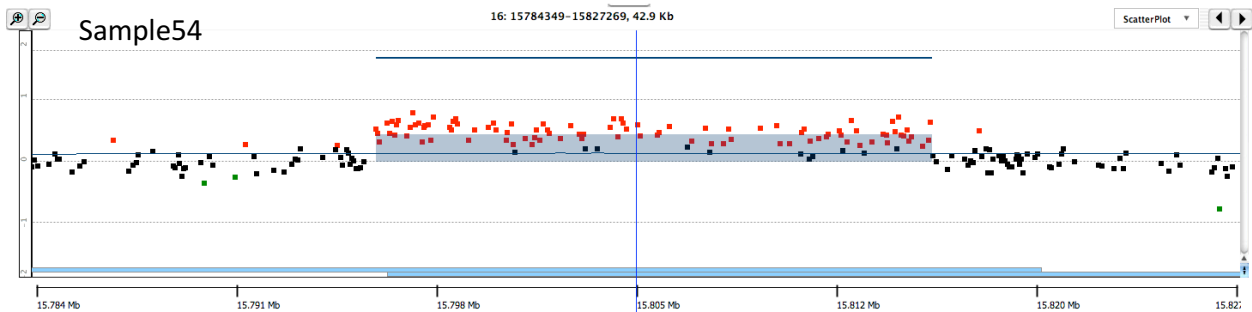

16: 15784349-15827269, 42.9 Kb

Chr16:15816331-15816331  
 AGCCAAACTTCCAGTATTCAGCAAAGACAGGGACCTCTAAATGGCACAGTCAACACAAAAATCCCACACT  
 AGCCAAACTTCCAGTATTCAGCAAAGTATTCAGCCAGTATTCCTGGCTCACATGATCCTCCTGCCTTAGC  
 CAGTGCAGTGGCGTGATCATAGCTCACTGCAGCCTGGAACTCCTGGCTCACATGATCCTCCTGCCTTAGC  
 AluJr - Chr16:15796336-15796336

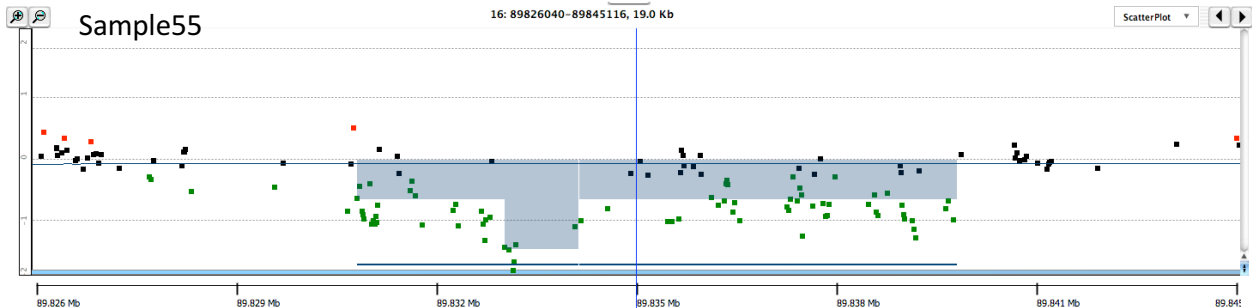

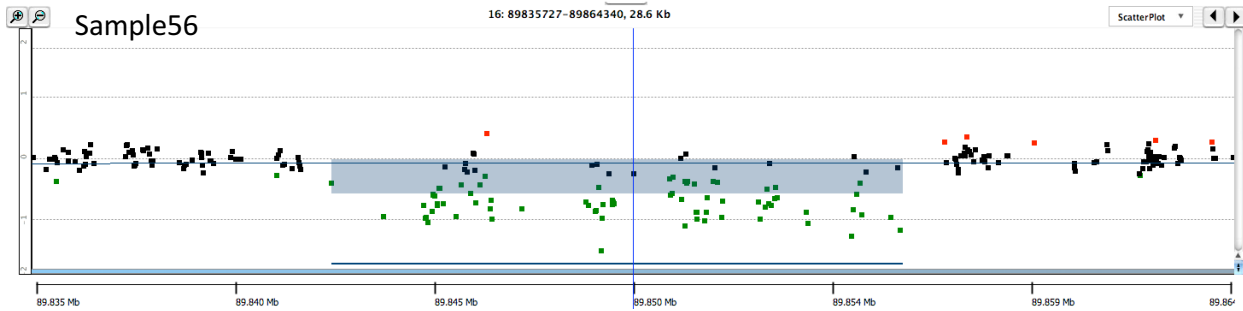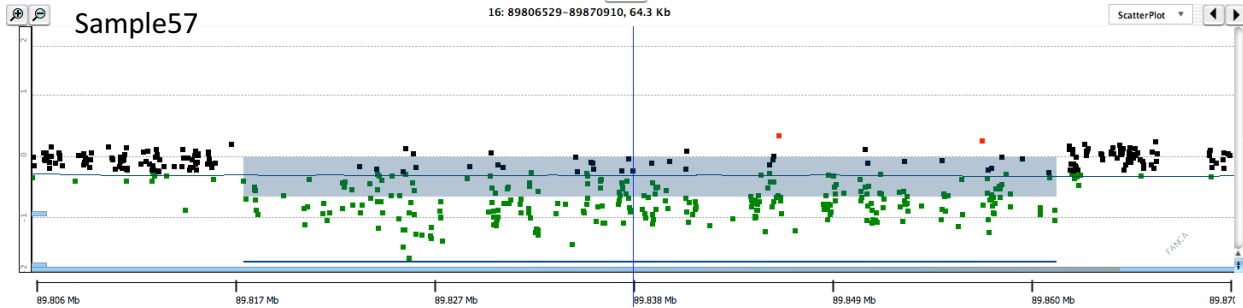

*AluJb* + Chr16:89817648-89817657  
 AAGAAGAATAAAGATCAGGTGCAGTGGCTCACG**CCTGTAATCC**AACAATTTGGAGACCGAGATGGGTGG  
 AAGAAGAATAAAGATCAGGTGCAGTGGCTCACG**CCTGTAATCC**CAACACTTCGACACTCTGGGAAGCCAA  
 ATTTCTATTTTACGCTGGGTGCGGTGGCTCACA**CCTGTAATCC**CAACACTTCGACACTCTGGGAAGCCAA  
*AluSx3* + Chr16:89861776-89861785

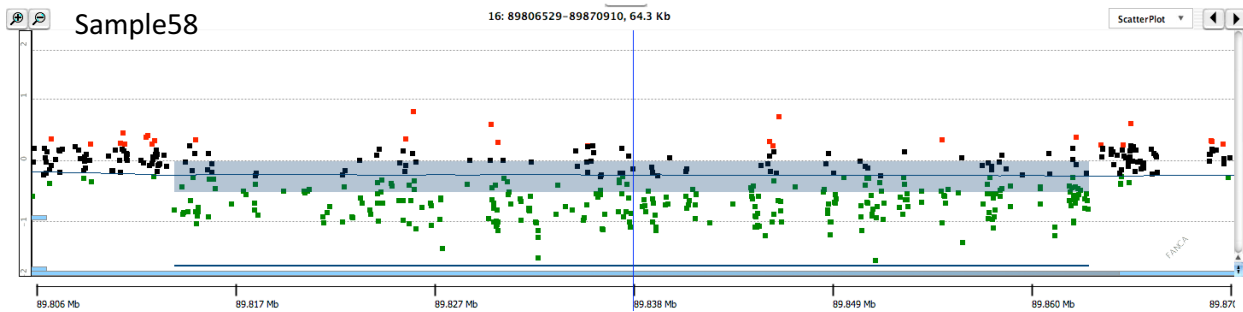

*AluSg* + Chr16:89814083-89814095  
 GTGAGCCAAGATTTCACTGCTGCACTCCAGCC**TGGGCGACAGAGC**AAGACTCTGTCTCAAAAAATAAATA  
 GTGAGCCAAGATTTCACTGCTGCACTCCAGCC**TGGGCGACAGAGC**GAAATTCGTCTCAAAAAAGAAAA  
 GTGAGCAGAGATCGCACCCTGCACTCCAGCA**TGGGCGACAGAGC**GAAATTCGTCTCAAAAAAGAAAA  
*AluY* + Chr16:89863542-89863554

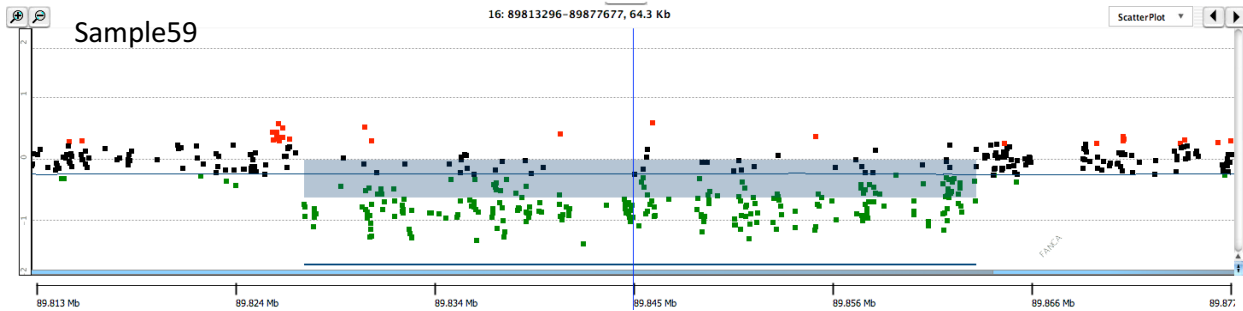

*AluY* + Chr16:89827581-89827592  
 GCCAGGCGCGGTGGCTCACGCC**CTTTGGGAGGC**CAAGGCAAGTGGATCACGAGGTCA  
 GCCAGGCGCGGTGGCTCACGCC**CTTTGGGAGGC**TGAGGTGGGTGTTATCACTTGAGG  
 GCCAGGTGCGGTGGCTCACGCC**CTTTGGGAGGC**TGAGGTGGGTGTTATCACTTGAGG  
*AluSq* + Chr16:89864039-89864050

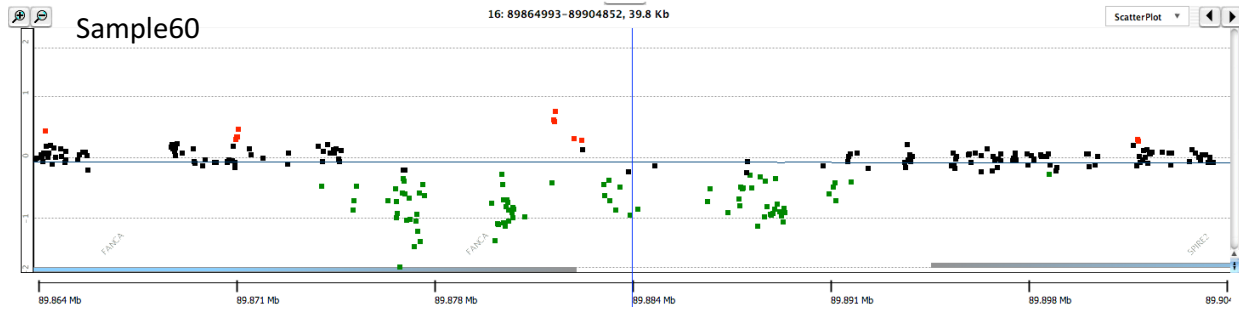

*AluY* - Chr16:89875354-89875376  
 GAGACAGAGTCGCGCTCTGTCA**CCCAGGCTGGAGTGCAGTGGCGC**CATCTCGGGTCACTGTAAGCTCTGC  
 GAGACAGAGTCACGCTCTGTCA**CCCAGGCTGGAGTGCAGTGGCGC**GATCTCGGCTCACTGCAAGCTCCGC  
 GAGATGGAGTCTCGCTCTGTCC**CCCAGGCTGGAGTGCAGTGGCGC**GATCTCGGCTCACTGCAAGCTCCGC  
*AluY* - Chr16:89891821-89891843

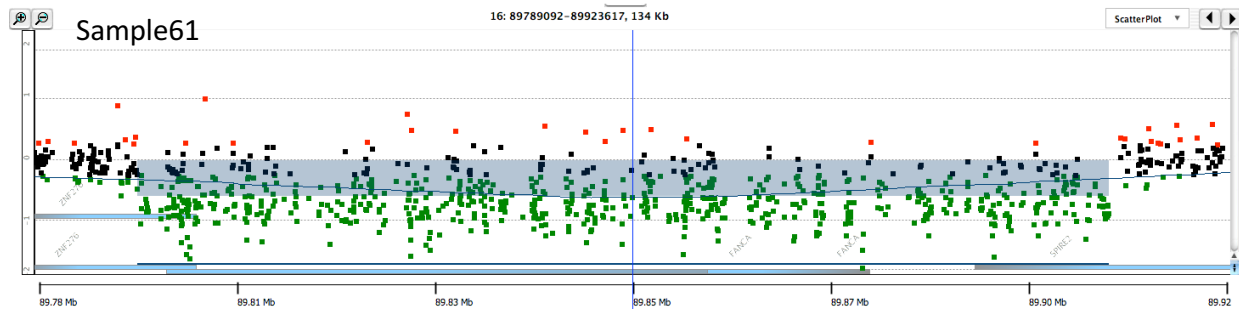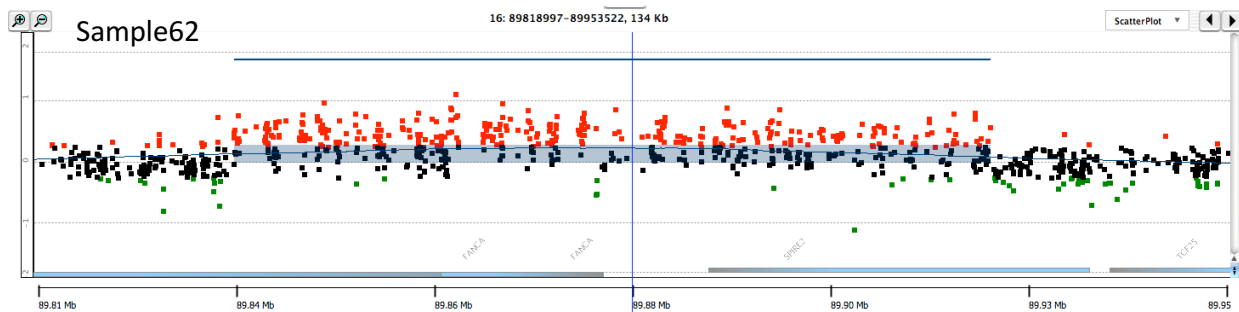

*AluJr* - Chr16:89926702-89926706  
 TTTTTCTTCTTTTTGAGACAAGGCTTGCTC**TGCTG**CCCAGGCTGGAGTGCAGAGGTACCATTATAGCTC  
 TTTTTCTTCTTTTTGAGACAAGGCTTGCTC**TGCTG**GCTTCTACTGGAGATAAAGCCACACACTTCAAGA  
 TCTTCAGCTCATAGCGGCTCCACAGGGAGAT**TGCTG**GCTTCTACTGGAGATAAAGCCACACACTTCAAGA  
 Chr16:89841572-89841576

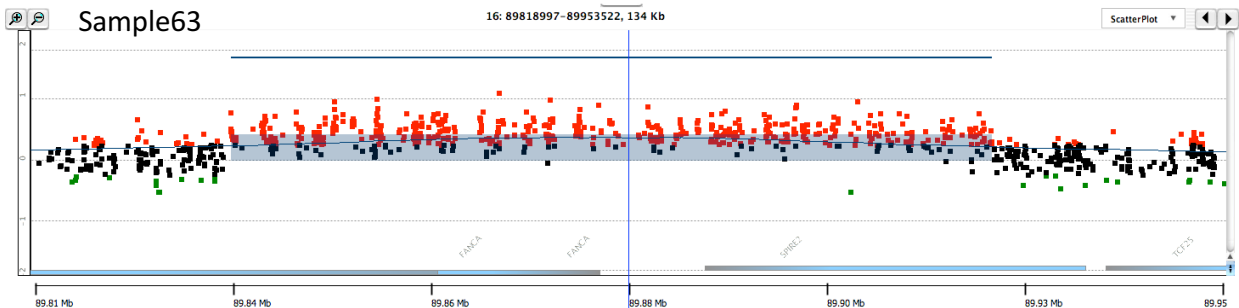

*AluJr* - Chr16:89926702-89926706  
 TTTTTCTTCTTTTTGAGACAAGGCTTGCTC**TGCTG**CCCAGGCTGGAGTGCAGAGGTACCATTATAGCTC  
 TTTTTCTTCTTTTTGAGACAAGGCTTGCTC**TGCTG**GCTTCTACTGGAGATAAAGCCACACACTTCAAGA  
 TCTTCAGCTCATAGCGGCTCCACAGGGAGAT**TGCTG**GCTTCTACTGGAGATAAAGCCACACACTTCAAGA  
 Chr16:89841572-89841576



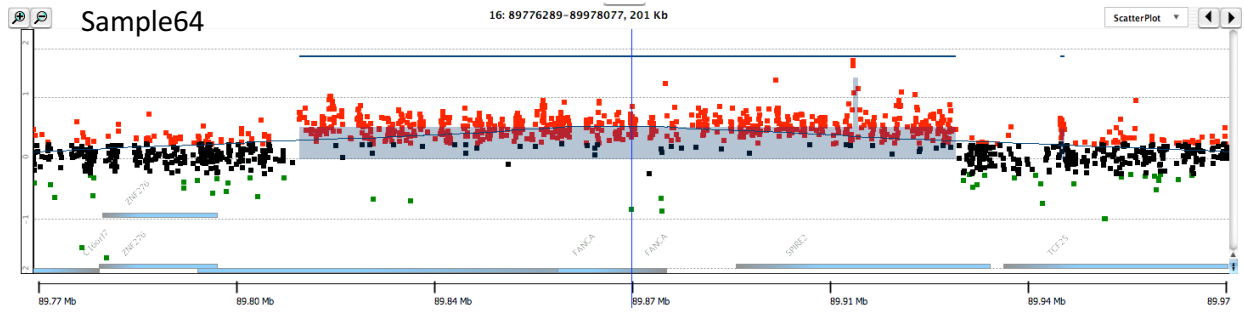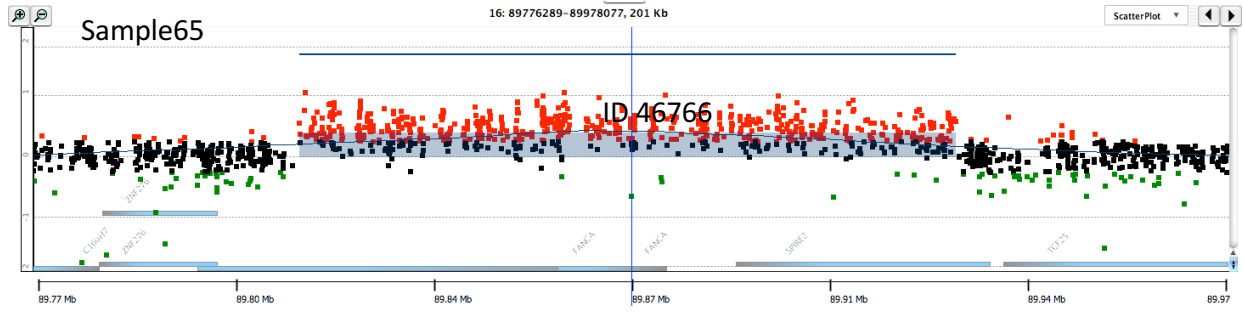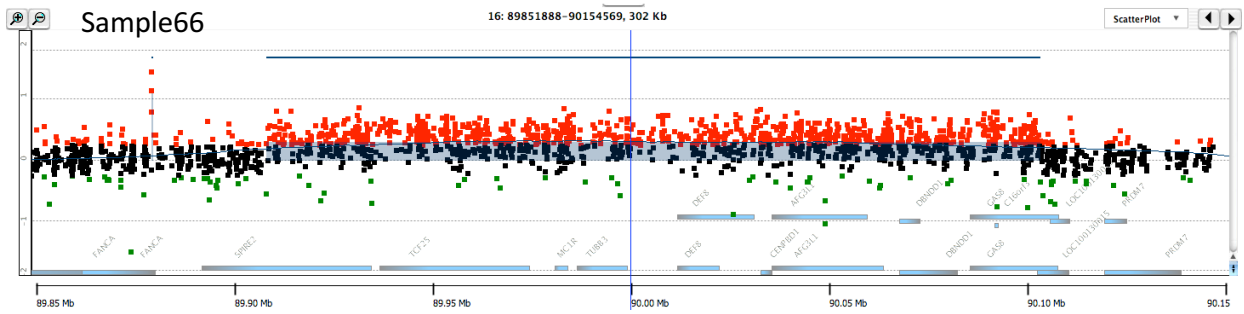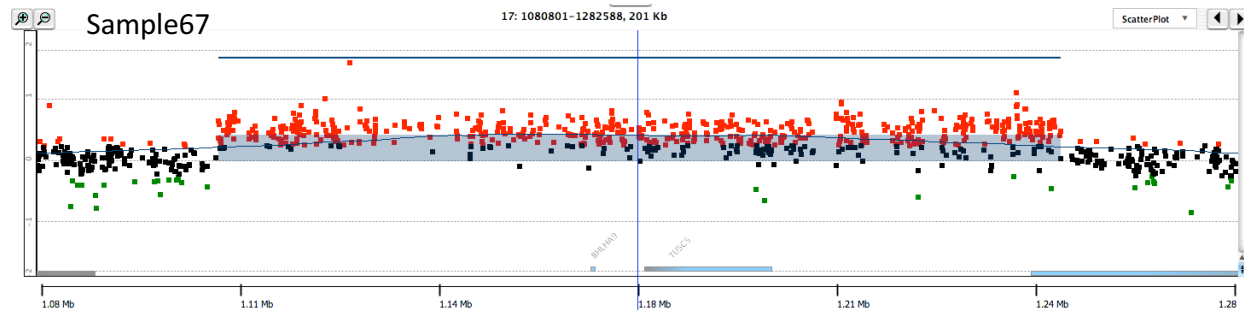

*AluSp* - Chr17:1253414-1253452  
 CCTGGCTAA**TTTTGTATTTT**AGTAGAGATGGGG**TTCTCCATGTTGG**TCAGGCTGGTCTCGAACTCCTG  
 CCTGGCTAA**TTTTGTATTTT**AGTAGAGATGGGG**TTCTCCATGTTGG**CCAGGATGGTCTCAAAC**TCCCG**  
*AluSx1* - Chr17:1111233-1111271  
 CAGCCTAA**TTTTGTATTTT**AGTAGAGATGGGG**TTCA**CCATGTTGGCCAGGATGGTCTCAAAC**TCCCG**

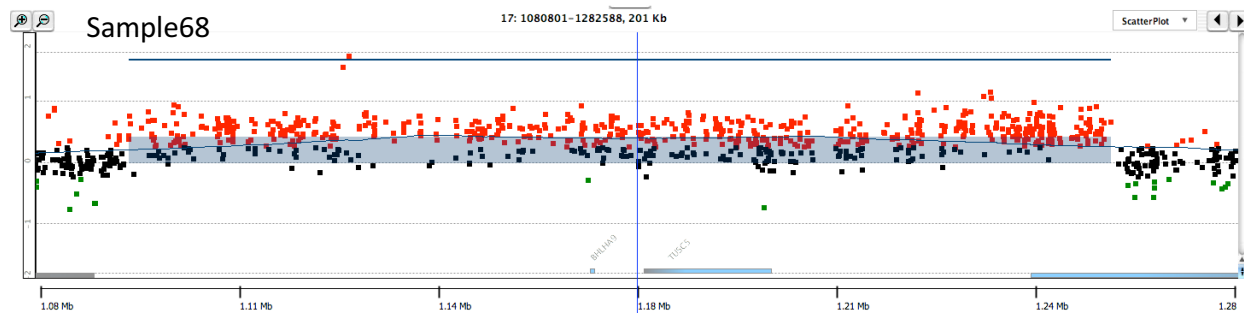

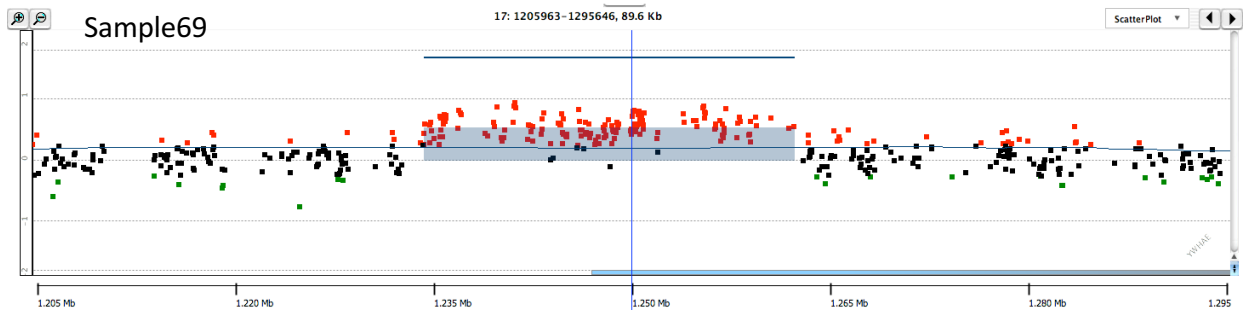

L1 +  
 Chr17:1263080-1263081  
 TTTCAAATAGTGGTGATTACACAACACTGTC AATGTATTTCGGTGCCACTAAATTGTTGTGTGTGTGTGTG  
 TTTCAAATAGTGGTGATTACACAACACTGTCGCTTGAACCCGGGAGGCGGAGGTTGCAGTGAGCTGAGAT  
 CAGCTACTCGGGAGGCTGAGGCAGGAGAA TCGCTTGAACCCGGGAGGTTGCAGTGAGCTGAGAT  
 AluSq2 +  
 Chr17:1234614-1234615

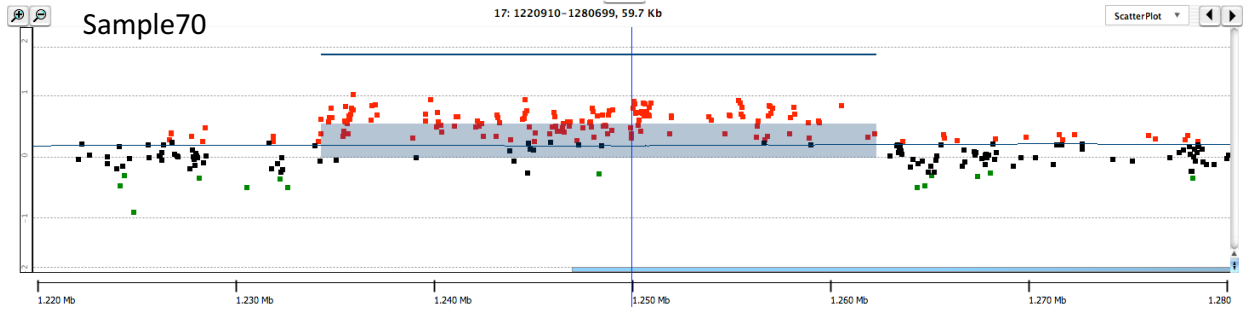

L1 +  
 Chr17:1263080-1263081  
 TTTCAAATAGTGGTGATTACACAACACTGTC AATGTATTTCGGTGCCACTAAATTGTTGTGTGTGTGTGTG  
 TTTCAAATAGTGGTGATTACACAACACTGTCGCTTGAACCCGGGAGGCGGAGGTTGCAGTGAGCTGAGAT  
 CAGCTACTCGGGAGGCTGAGGCAGGAGAA TCGCTTGAACCCGGGAGGTTGCAGTGAGCTGAGAT  
 AluSq2 +  
 Chr17:1234614-1234615

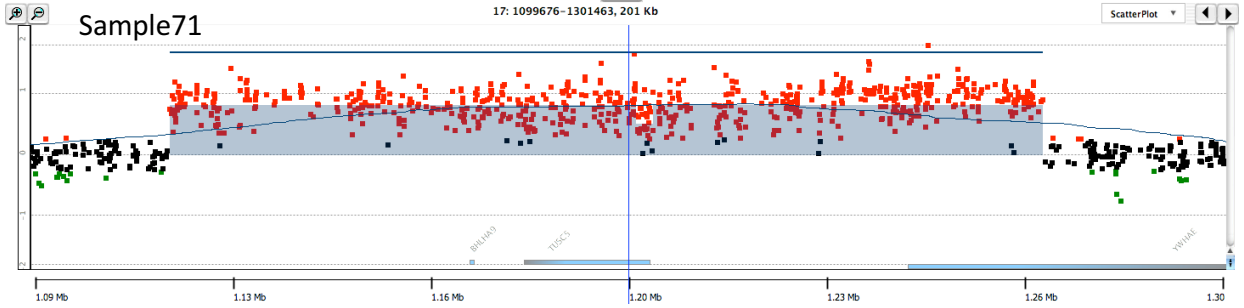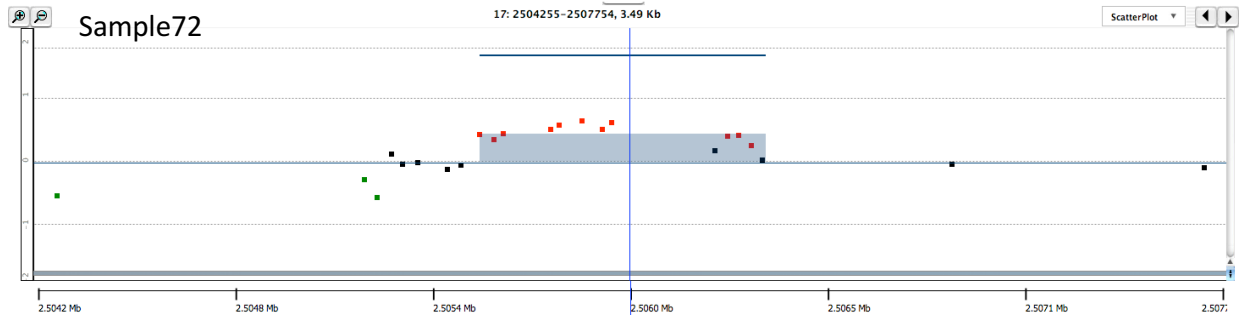

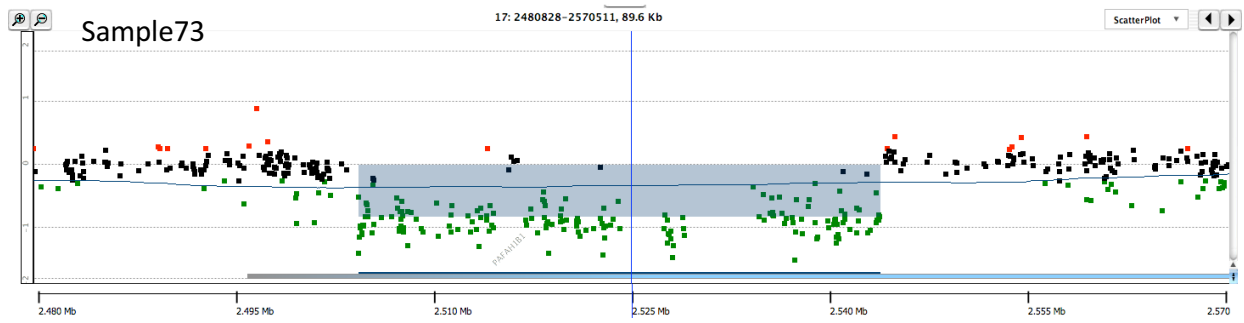

*AluSq2* - Chr17:2504984-2504991  
 AGGCCTTGAACCTCCTGACCTCAGGTGATCCTCCTG**CCTCGGCC**CCGCAAAGTGCTGGGATTACAGGCATG  
 AGGCCTTGAACCTCCTGACCTCAGGTGATCCTCCTG**CCTCGGCC**TCCCAAAGTGCTGGGATTACAGATGTG  
 TGGTCTTGAACCTCCTGACCTCAGGTGATG**CCGCCA****CCTCGGCC**TCCCAAAGTGCTGGGATTACAGATGTG  
*AluSx1* - Chr17:2544701-2544708

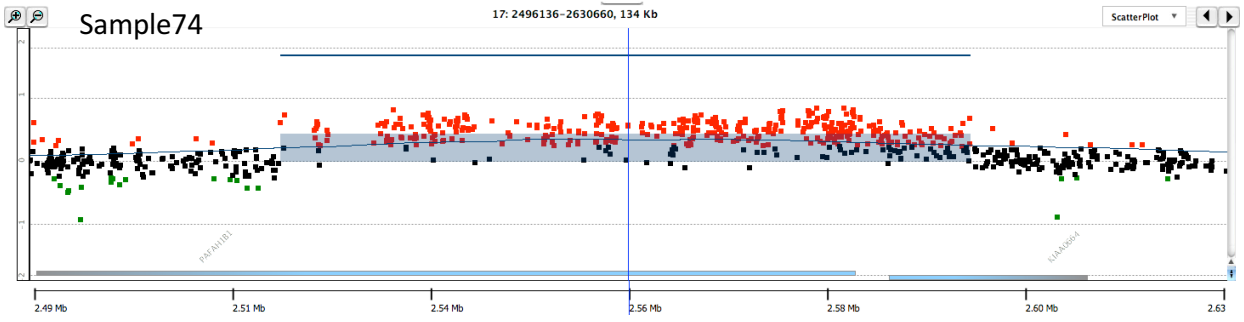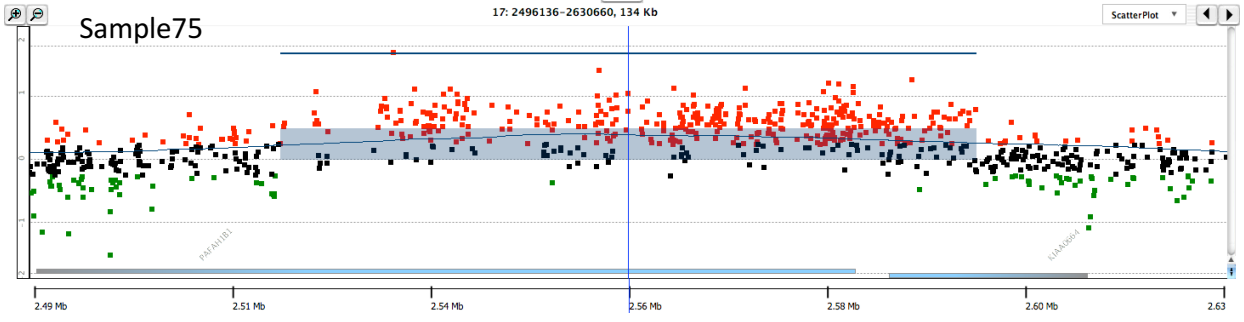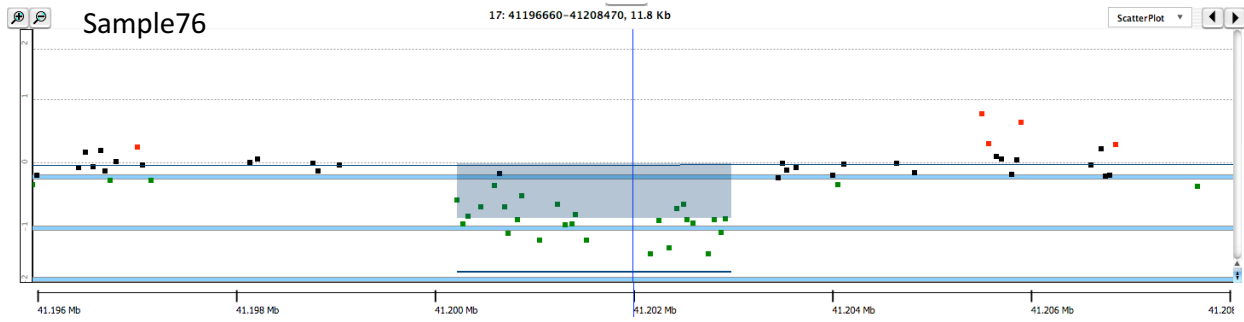

*AluSc* - Chr17:41200437-41200445  
 GACGGGGTTTCGCCATGTTGGTTGGCCAGGAT**TGGTCTCGA**TCTCTTGACCTCGTGATCTGCCACCTCAG  
 GACGGGGTTTCGCCATGTTGGTTGGCCAGGAT**TGGTCTCGA**ACTCCTGACCTCGTGATCTGCCTGTCTTGG  
 TAGAGACAGGGTTTCACCATGTTGGT**CAGGC****TGGTCTCGA**ACTCCTGACCTCGTGATCTGCCTGTCTTGG  
*AluSg* - Chr17:41203867-41203875

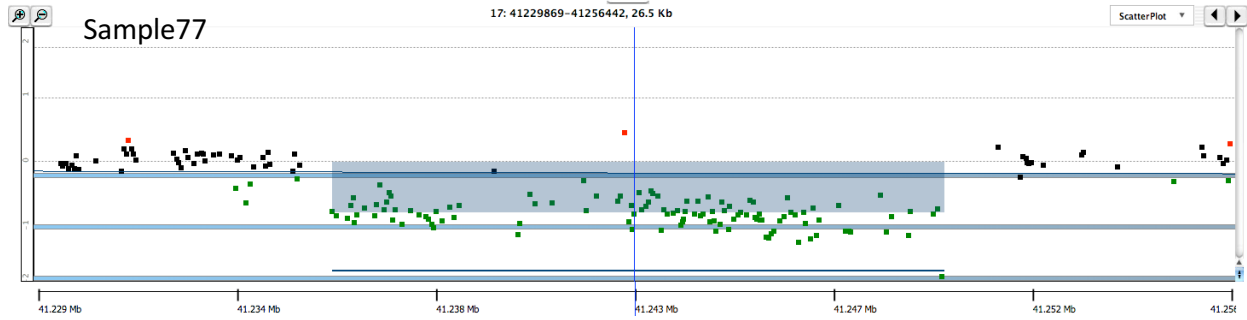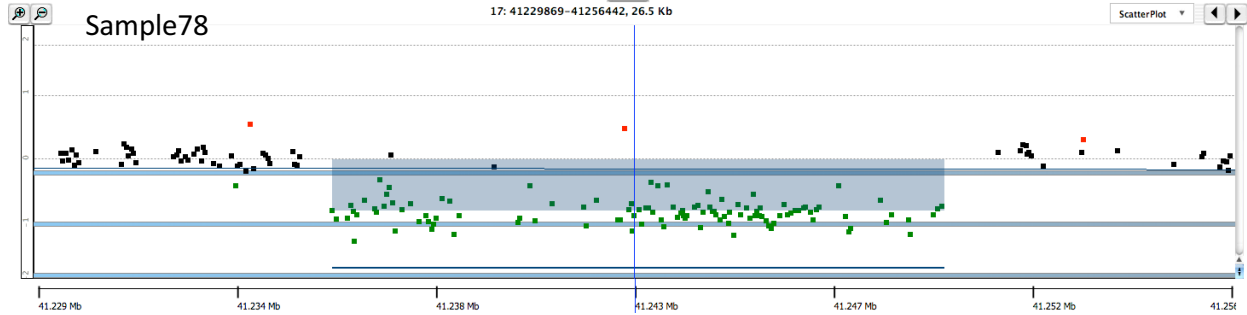

*AluSx* - Chr17:41236381-41236389  
 ATTTTGTATTTTGTAGTAGAGACGGGTTTCA**CCATGTTGG**CCAGGCTGGTCTTGAACTCCTGACCTCAG  
 ATTTTGTATTTTGTAGTAGAGACGGGTTTCA**CCATGTTGG**CAGGCTGGTCTTGAACTCCCGACCTCAG  
 TTTTGTATTTTGTAGTAGAGATGGGTTTCT**CCATGTTGG**TCAGGCTGGTCTTGAACTCCCGACCTCAG  
*AluSp* - Chr17:41251038-41251046

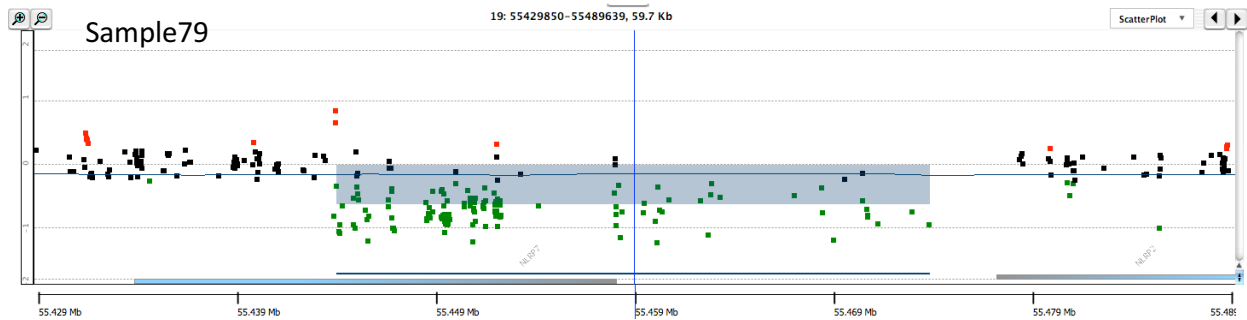

*AluY* - Chr19:55444778-55444793  
 CATGATCCACCCGCCTCGGCCTCCCAAAGT**GCTGGGATTACAGGCA**TGAGCCACCACGCCTGGCCTCTGC  
 CATGATCCACCCGCCTCGGCCTCCCAAAGT**GCTGGGATTACAGGCA**CCCGCCACCACGCCGACTAATTT  
 AAGCAATTCCTGCTTCAGCCTCCCAAAGT**GCTGGGATTACAGGCA**CCCGCCACCACGCCGACTAATTT  
*AluSg7* - Chr19:55475378-55475393

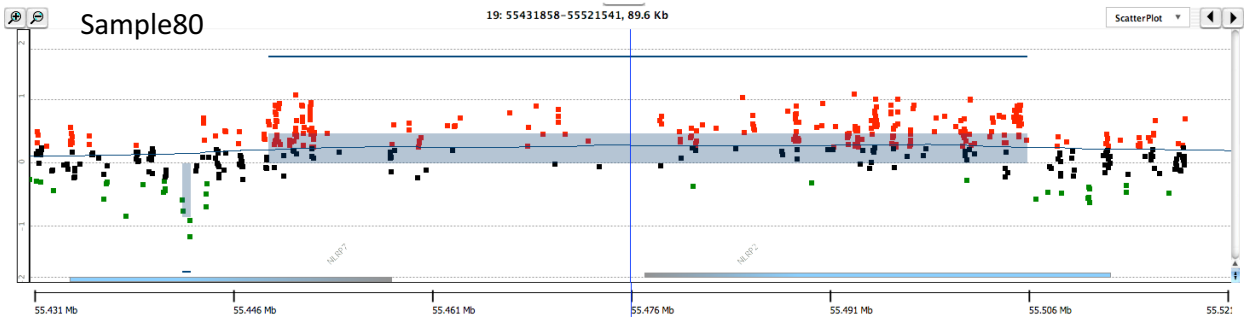

*AluSq2* - Chr19:55506229-55506238  
 CCTCAGGTGATCCGCCATCTC**GGCCTCCCAA**AGTGCTGGGATTACAGGCGTGAGCCACTGCGCCAGGCC  
 CCTCAGGTGATCCGCCATCTC**GGCCTCCCAA**ACGTGCTGGGATTACAGGCATGAGCCACCACCGCC  
 GACCTCGTGATCTCCCCGCCTT**GGCCTCCCAA**CGTGCTGGGATTACAGGCATGAGCCACCACCGCC  
*AluY* - Chr19:55445561-55445570

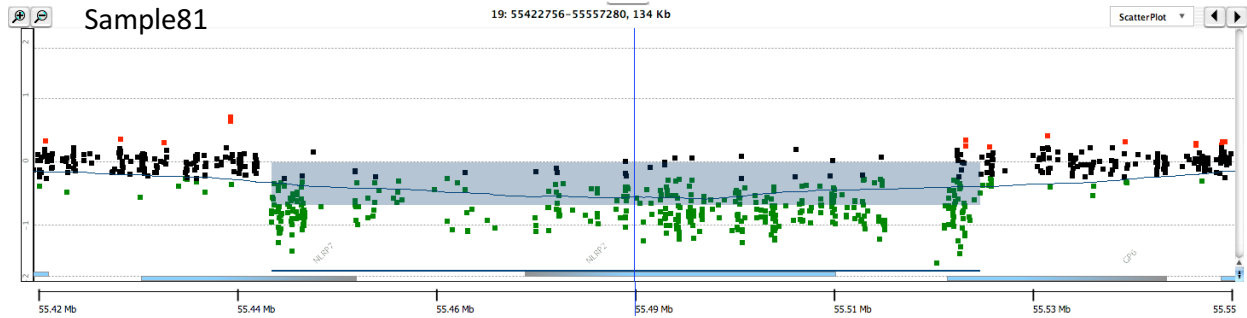

AluSq2 + Chr19:55449271-55449271  
 AGCCTGGGCAACAAGAGTAAATCTCCGTCTCACCAAAAAAAAAAAAAAAAAAAAAGACAGCTGGAAAATC  
 AGCCTGGGCAACAAGAGTAAATCTCCGTCTACCAAGGGTTGGGTGCAGAGTCAGGAGAGGTTAGGAAG  
 GATGCCATGGGGAAATGGAAGAAAAGGCAGAGTGAGTGGGTTGGGTGCAGAGTCAGGAGAGGTTAGGAAG  
 L2 - Chr19:55528913-55528913

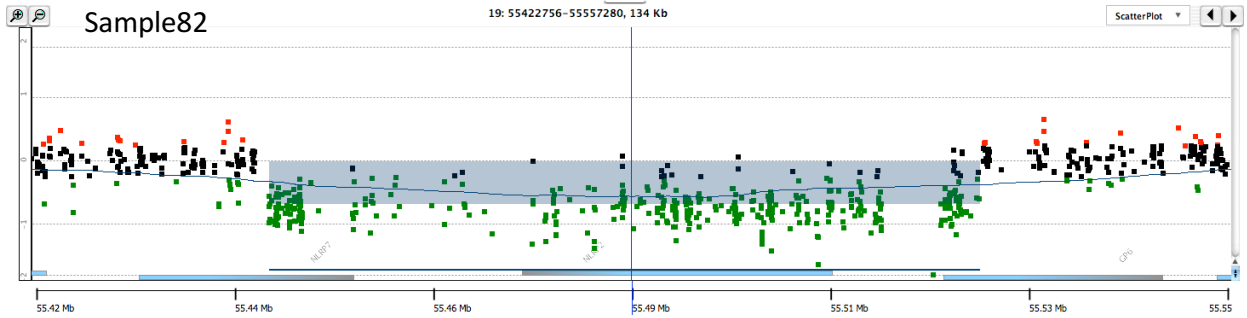

AluSq2 + Chr19:55449271-55449271  
 AGCCTGGGCAACAAGAGTAAATCTCCGTCTCACCAAAAAAAAAAAAAAAAAAAAAGACAGCTGGAAAATC  
 AGCCTGGGCAACAAGAGTAAATCTCCGTCTACCAAGGGTTGGGTGCAGAGTCAGGAGAGGTTAGGAAG  
 GATGCCATGGGGAAATGGAAGAAAAGGCAGAGTGAGTGGGTTGGGTGCAGAGTCAGGAGAGGTTAGGAAG  
 L2 - Chr19:55528913-55528913

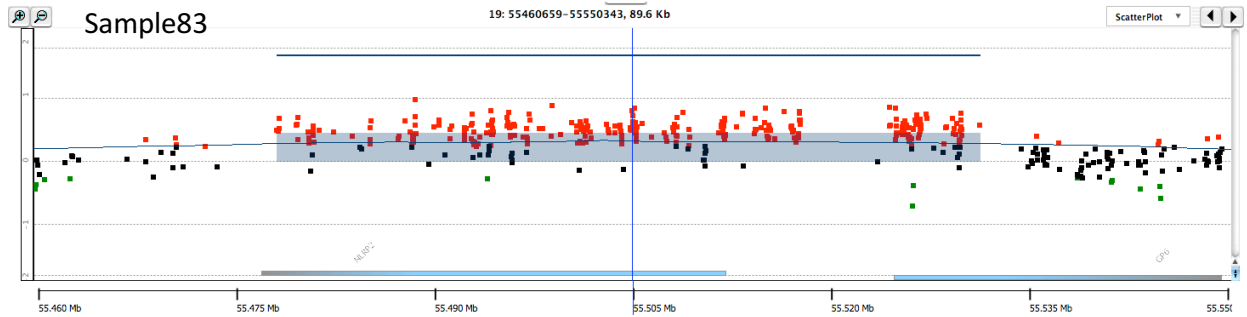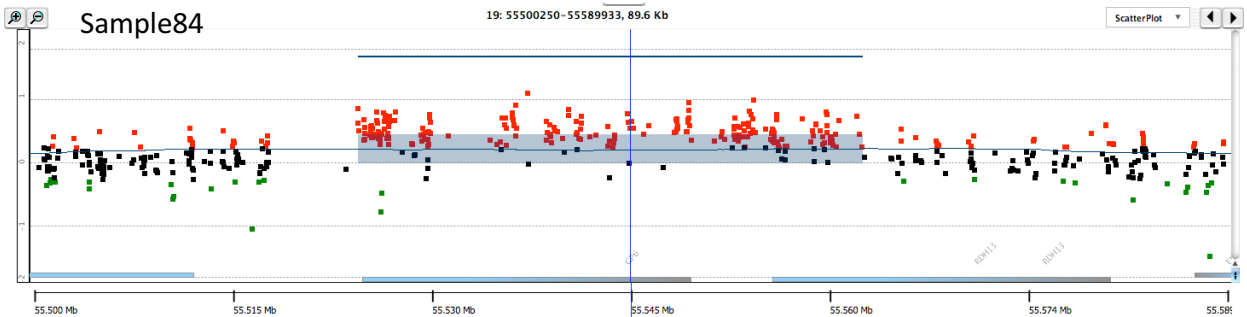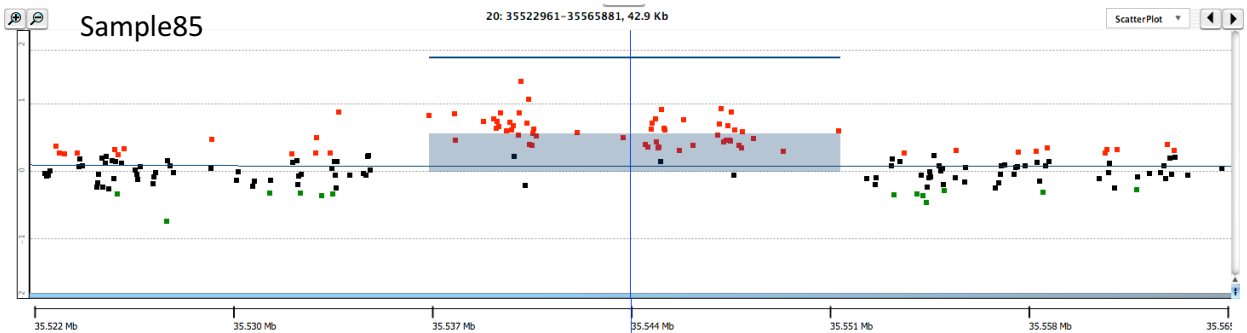

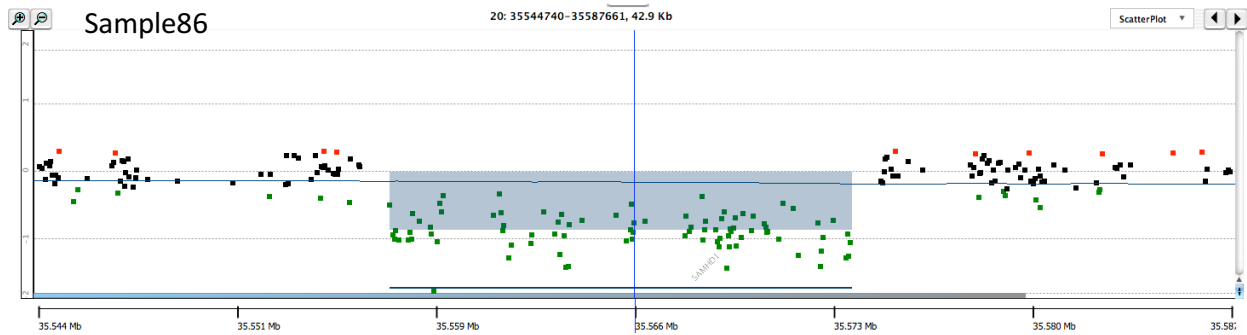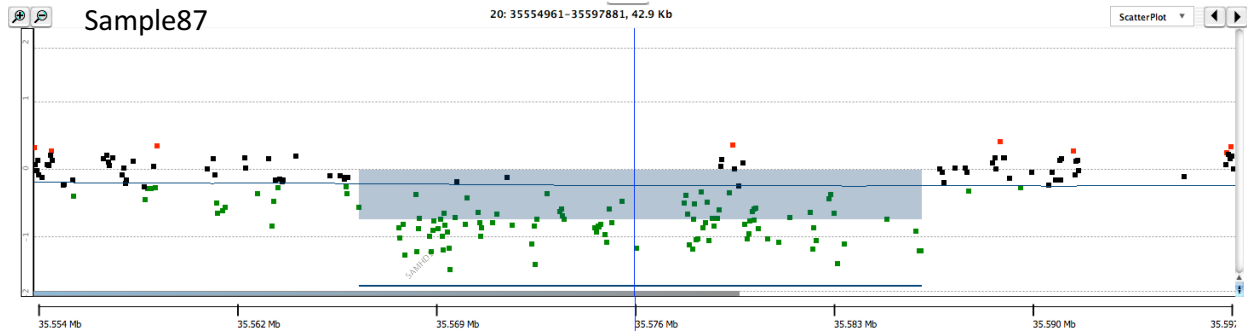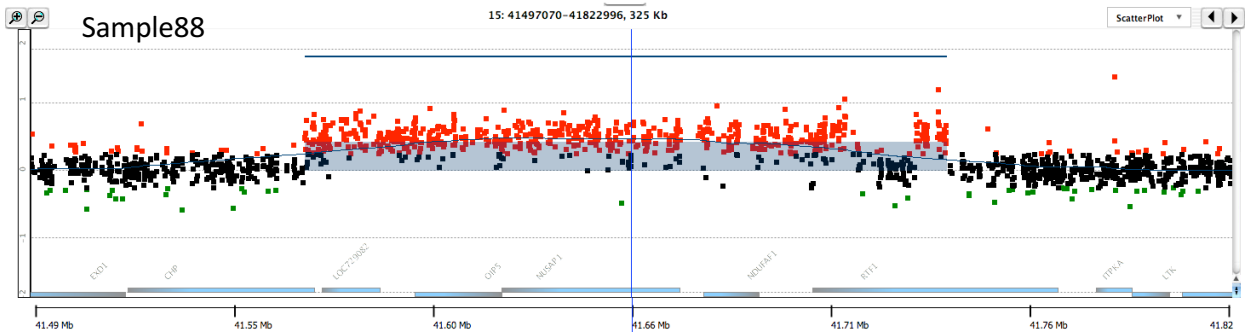

*Alujr4* + Chr15:41745798-41745799  
 CAAAAAATTTAAAAATTAGCTGGGTGTTATGGTATGCACCTGAGGTCCCAACTACTTAGGAGGCTGAGG  
 CAAAAAATTTAAAAATTAGCTGGGTGTTATGGTATGCACGTTTTAGTGGCTGGGCGCGGTGGCTTACGC  
 TGTTAAGGTTGGTCACTTACTTCTTTGTTTTGAAAAAGTTACGTTTTAGTGGCTGGGCGCGGTGGCTTACGC  
 Chr15:41571119-41571120

*L2a* + Chr15:41721734-41721734  
 GGTACTCCCCTGCTTCAAACCATTTGATGGCTTCCACTGCCTAACTTCCATGCTCCTCACCCCTGTTTT  
 GGTACTCCCCTGCTTCAAACCATTTGATGGCTTCCATCAAACGTGCAGGATGGTCTTGATCTCCTGACC  
 ATTTTTTTTTGTATTTTTAGTAGAGACGGGGTTCTCTGTGTTAGCCAGGATGGTCTTGATCTCCTGACC  
*AluY* - Chr15:41737342-41737342

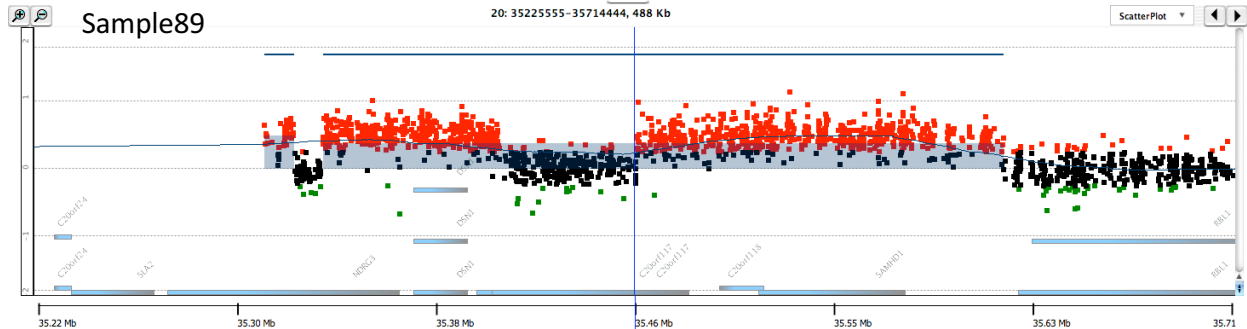

Supplement: supp_gr.229401.117_Supplemental_Fig_S7.pdf [file supp_gr.229401.117_Supplemental_Fig_S7.pdf]
