# Supplementary material for: Predicting human genes susceptible to genomic instability associated with Alu/Alu-mediated rearrangements
Source: PubMed Central journal article supplement — Genome Res. 2018 Aug;28(8):1228–42. doi: 10.1101/gr.229401.117 (PMC6071635; doi:10.1101/gr.229401.117), 2018-08

**Supplemental Fig S1. The size and genomic distribution of the 219 collected AAMR events.** (A) The histogram on the top shows the size distribution of the 219 AAMR resultant deletions. The bottom panel zooms in to the AAMR resultant deletions with a size less than 250 kb. (B) We plotted each of the 219 AAMR resultant deletions with a red block on the GRCh37/hg19 ideogram. The repetitively targeted regions are plotted only once. (C) We plotted each of the 219 AAMR resultant deletions with a red line on top of the GRCh38/hg38 ideogram. The relative density of these known AAMR events was plotted below the ideogram as a purple smoothed histogram.

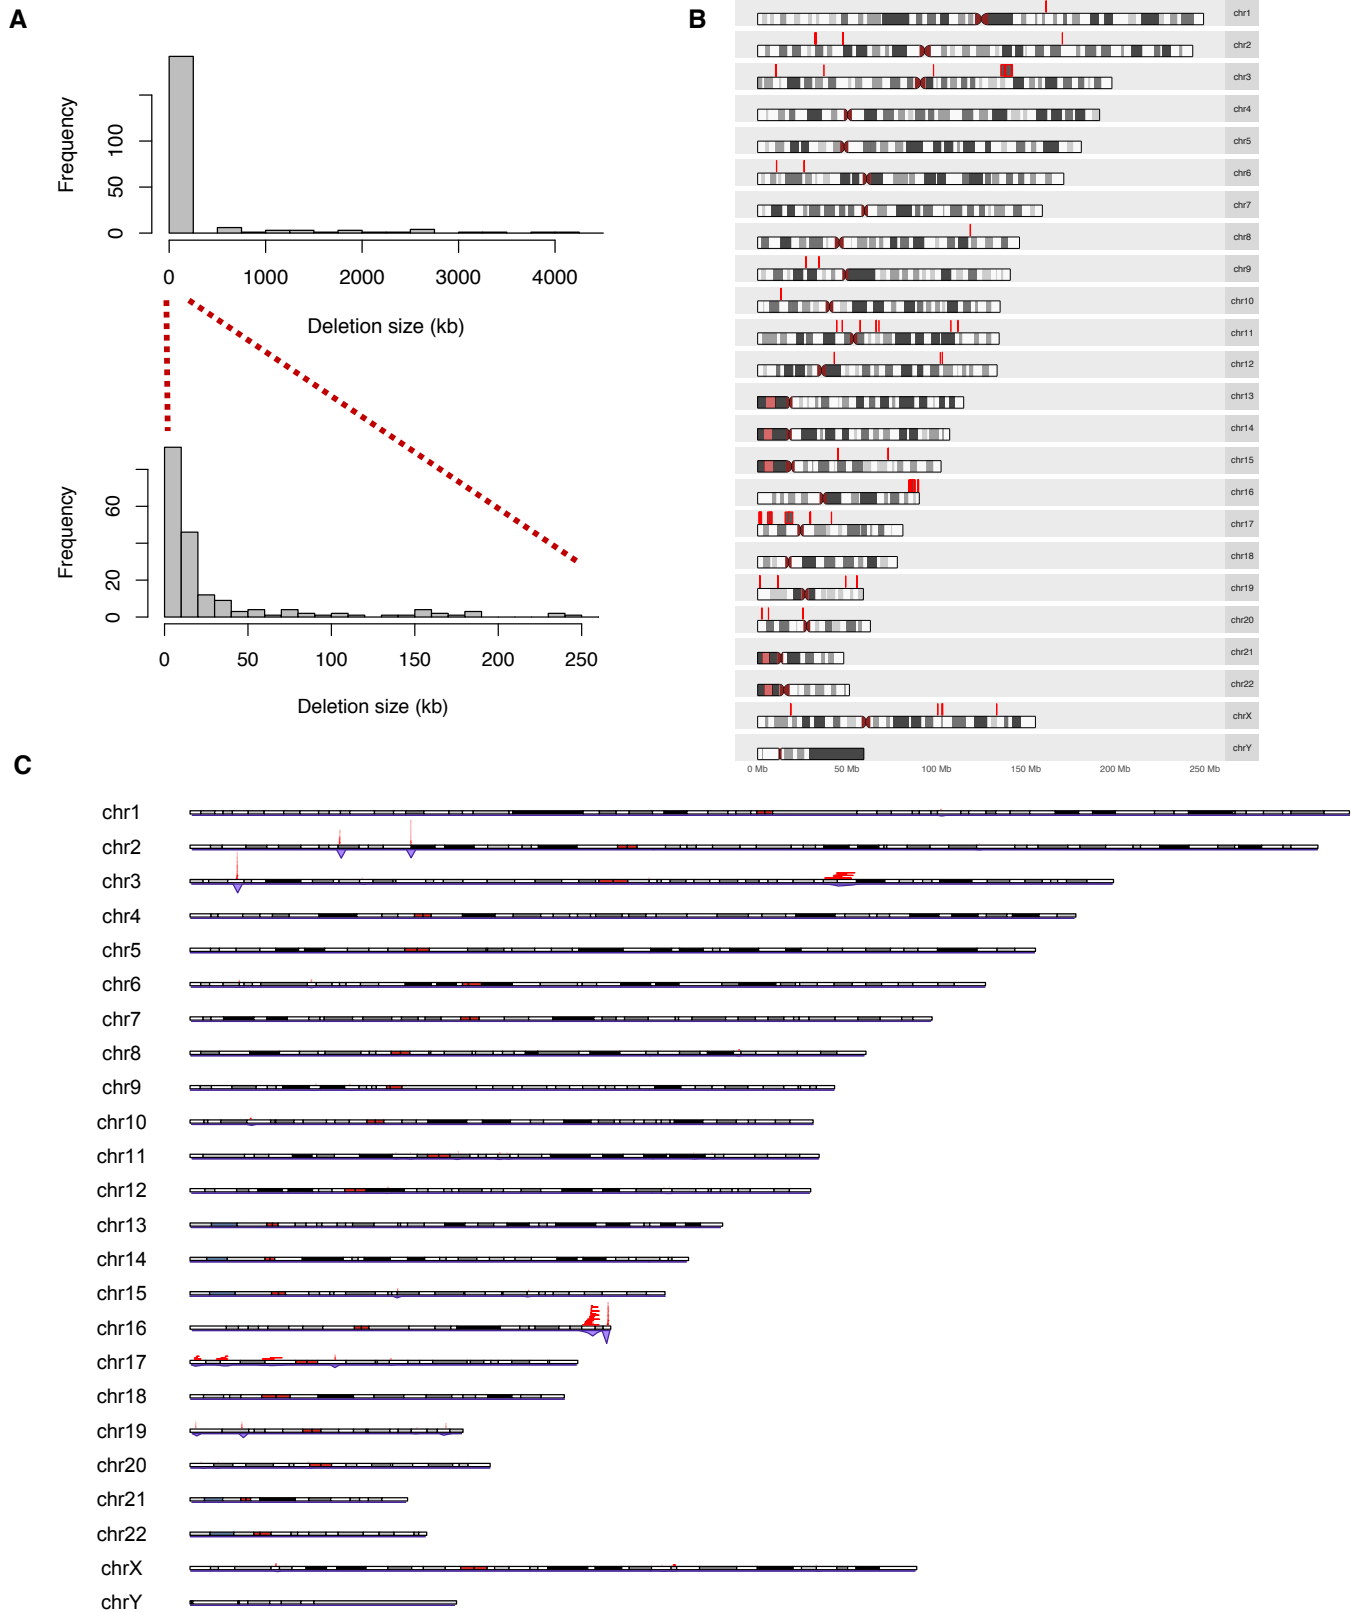

Supplement: supp_gr.229401.117_Supplemental_Fig_S1.pdf [file supp_gr.229401.117_Supplemental_Fig_S1.pdf]
