# Supplementary material for: Predicting human genes susceptible to genomic instability associated with Alu/Alu-mediated rearrangements
Source: PubMed Central journal article supplement — Genome Res. 2018 Aug;28(8):1228–42. doi: 10.1101/gr.229401.117 (PMC6071635; doi:10.1101/gr.229401.117), 2018-08

**Supplemental Fig S2.** Sixty-two (out of 219) breakpoint junctions of AAMR events are intersecting a 26 bp core sequence which was proposed by Rudiger *et al* (Rudiger *et al.* 1995). We compared the *Alu* subfamily composition of these 62 pairs with respect to the expected numbers in the total 219 events. We found no significant enrichment of a specific composition (one-tailed binominal test, ns  $P > 0.05$ ).

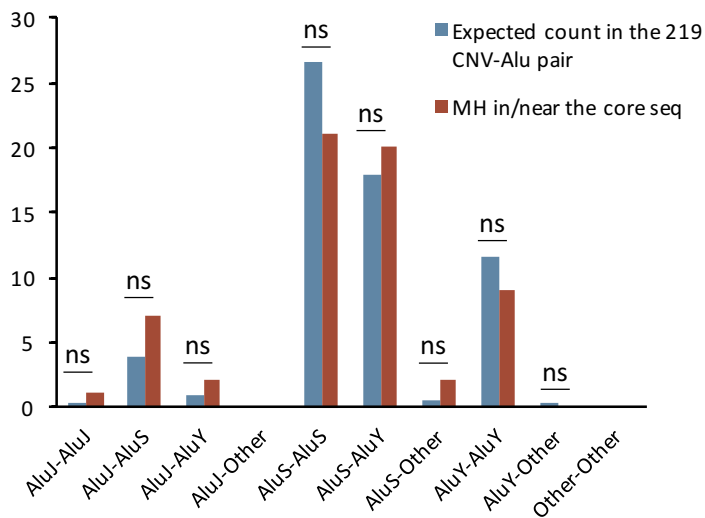

Supplement: supp_gr.229401.117_Supplemental_Fig_S2.pdf [file supp_gr.229401.117_Supplemental_Fig_S2.pdf]
