# Supplementary material for: Predicting human genes susceptible to genomic instability associated with Alu/Alu-mediated rearrangements
Source: PubMed Central journal article supplement — Genome Res. 2018 Aug;28(8):1228–42. doi: 10.1101/gr.229401.117 (PMC6071635; doi:10.1101/gr.229401.117), 2018-08

**Supplemental Fig S3. The *Alu* pairs utilized in the yeast template switching assay and the position on a consensus *Alu* sequence of the microhomologies at breakpoint junctions.** (A-B) The sequence of *AluSx1* (Chr2:32378388-32378684, GRCh37/hg19) is shown, and the microhomologies that align with *AluSp* (Chr2:32381110-32381405, GRCh37/hg19, in A) or *AluY* (Chr2:32403014-32403315, GRCh37/hg19, in B) are colored in red and marked with a blue line on top. We also represent the *AluSx1* sequence as a rectangle and colored the homologous region in red using NCBI BLAST for easier comparison of the two constructs. (C-E) The relative positions of the microhomologies observed in the *AluSx1-AluSp* strain on an *Alu* consensus sequence (lower panel) were presented. Panel C describes the published 74 events (Mayle et al. 2015); D shows the results from the second batch including 250 events (including the published 74 events) and panel E displays the 503 events (including the 250 events in panel C).

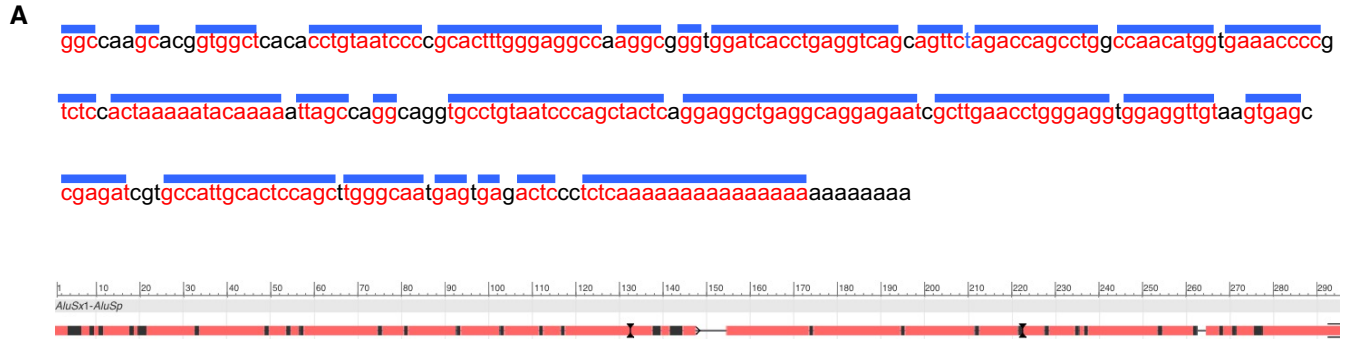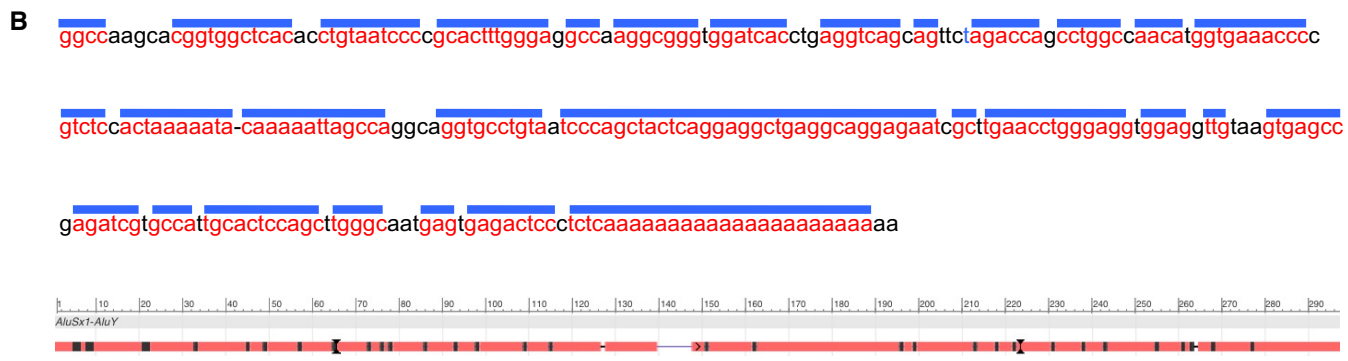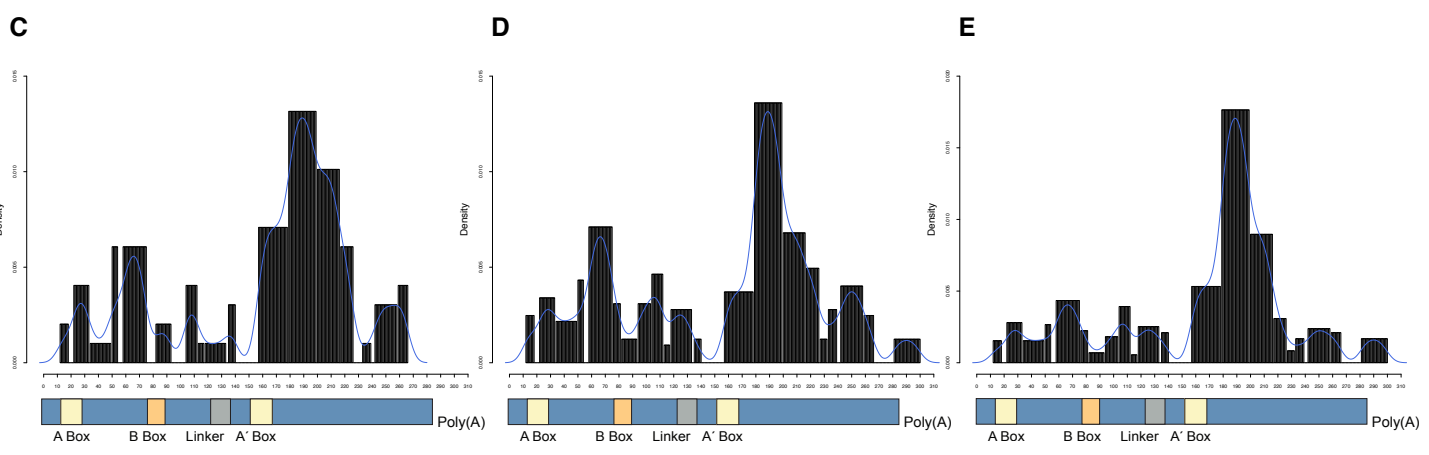

Supplement: supp_gr.229401.117_Supplemental_Fig_S3.pdf [file supp_gr.229401.117_Supplemental_Fig_S3.pdf]
