# Supplementary material for: Predicting human genes susceptible to genomic instability associated with Alu/Alu-mediated rearrangements
Source: PubMed Central journal article supplement — Genome Res. 2018 Aug;28(8):1228–42. doi: 10.1101/gr.229401.117 (PMC6071635; doi:10.1101/gr.229401.117), 2018-08

**Supplemental Fig S4. Method of generating Ctrl-*Alu* pairs for feature selection.** (A) Selecting Ctrl-*Alu* pairs for analyzing *Alu* sequence features. Each block arrow indicates an *Alu* element. Arrow in maroon stands for a 5' CNV-*Alu* element, while arrow in pink indicates 3' CNV-*Alu* element. Non CNV-*Alus* are in blue. (B) A diagram shows the method of picking Ctrl-*Alu* pairs for genomic feature analyses and generating test dataset for predicting *Alu* pairs as being at high risk for AAMR.

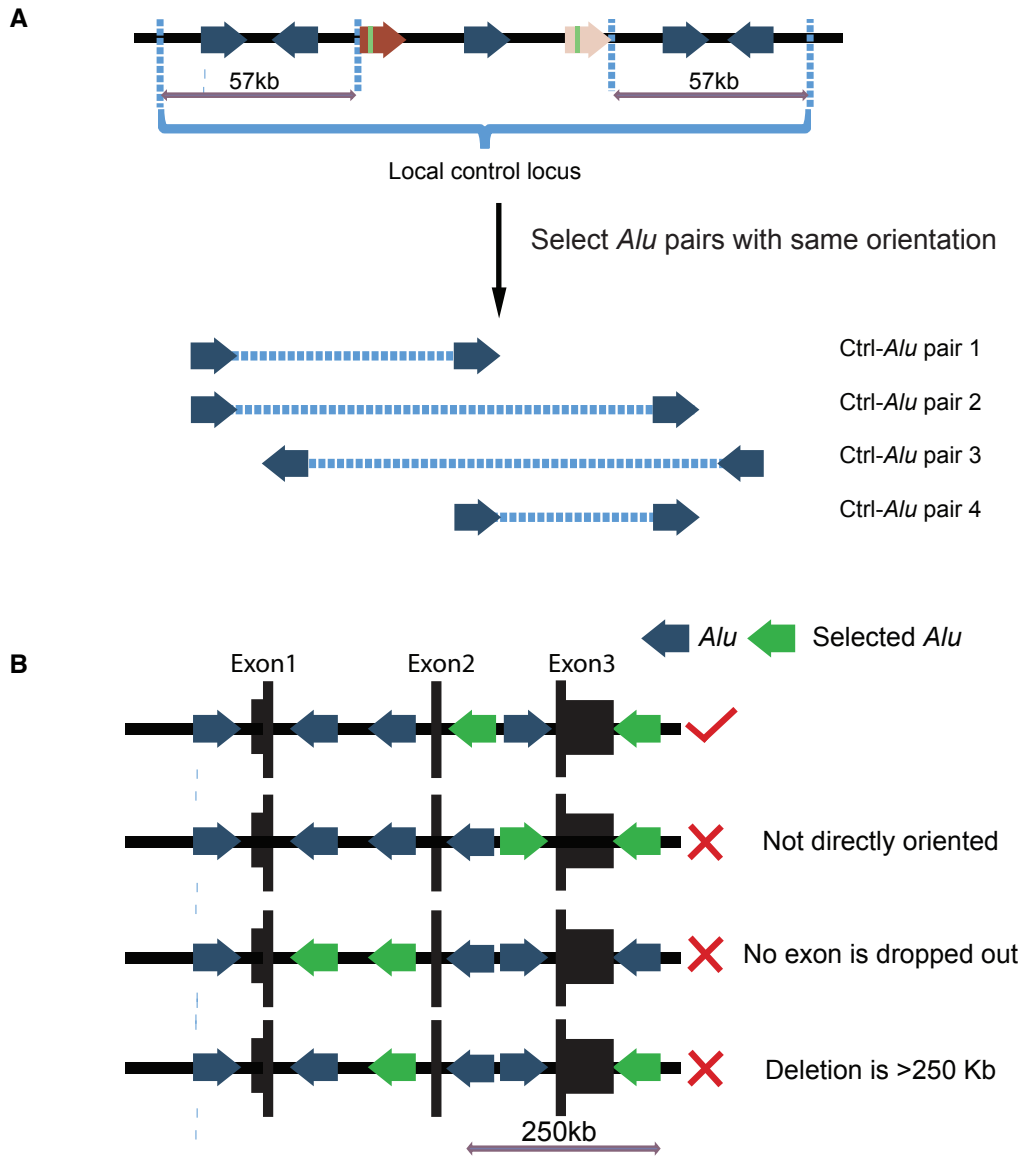

Supplement: supp_gr.229401.117_Supplemental_Fig_S4.pdf [file supp_gr.229401.117_Supplemental_Fig_S4.pdf]
