# Supplementary material for: Predicting human genes susceptible to genomic instability associated with Alu/Alu-mediated rearrangements
Source: PubMed Central journal article supplement — Genome Res. 2018 Aug;28(8):1228–42. doi: 10.1101/gr.229401.117 (PMC6071635; doi:10.1101/gr.229401.117), 2018-08

**Supplemental Fig S6.** We tested a series of prior probability settings in the QDA model training from 0 to 0.4. A prior probability of 0.3 provided the best performance in prediction sensitivity in testing the known 192 CNV-*Alu* pairs.

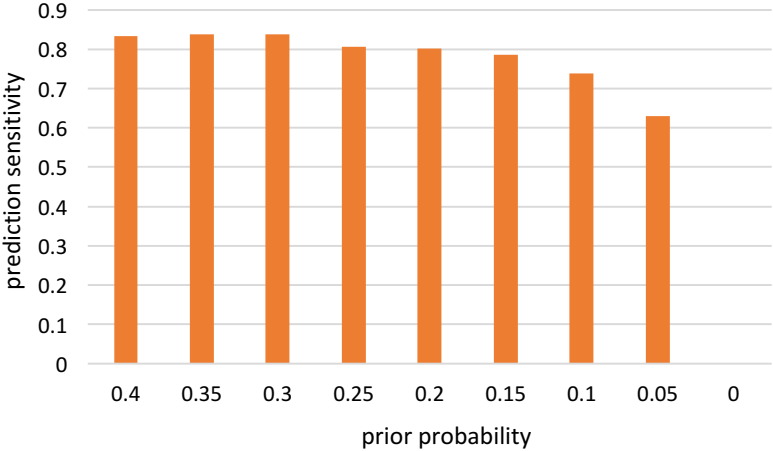

Supplement: supp_gr.229401.117_Supplemental_Fig_S6.pdf [file supp_gr.229401.117_Supplemental_Fig_S6.pdf]
