# Supplementary material for: Predicting human genes susceptible to genomic instability associated with Alu/Alu-mediated rearrangements
Source: PubMed Central journal article supplement — Genome Res. 2018 Aug;28(8):1228–42. doi: 10.1101/gr.229401.117 (PMC6071635; doi:10.1101/gr.229401.117), 2018-08

**Supplemental Fig S8. The recurrence of 5 AAMR events in the validation dataset.** (A) A bar chart shows the frequency of being observed for each of the unique AAMR events. (B) The UCSC Genome Browser image depicts a unique AAMR event which was observed 4 times in the validation dataset (*Alu-Alu* gain panel) and 5 times in the DGV database (Database of Genomic Variants). (C) Another AAMR event was detected 9 times in the validation dataset and 4 times in the DGV database.

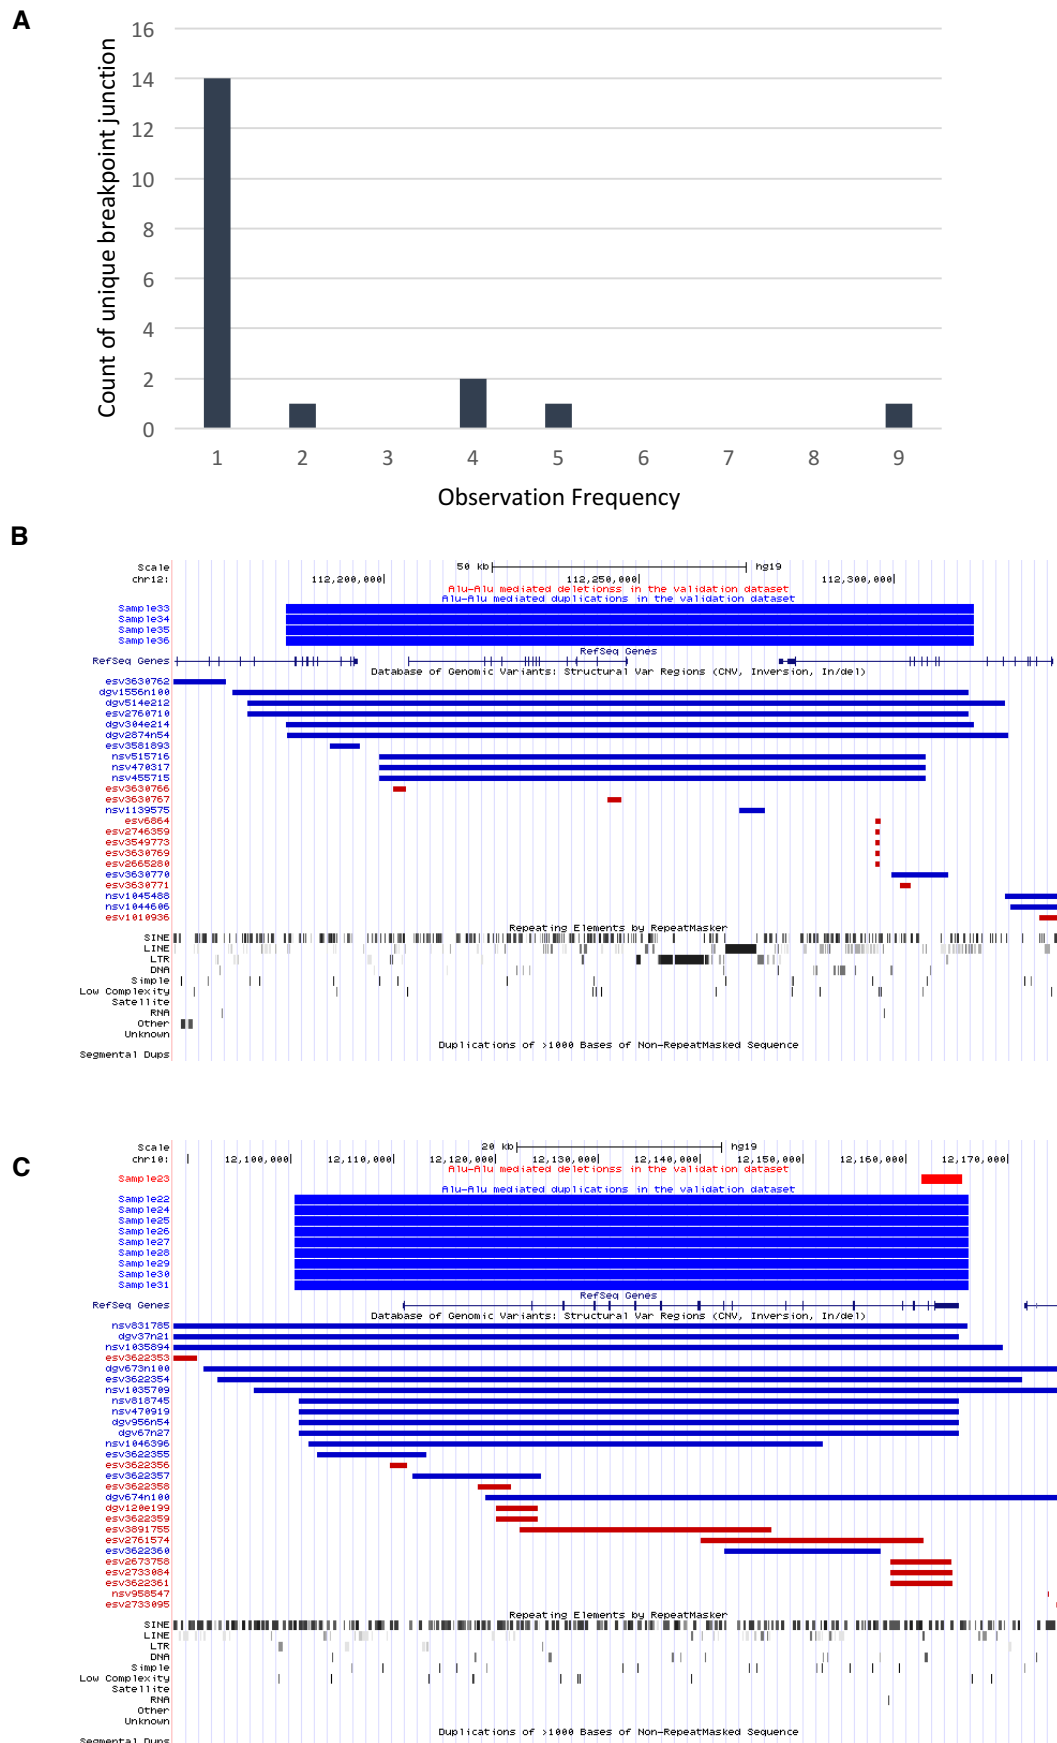

Supplement: supp_gr.229401.117_Supplemental_Fig_S8.pdf [file supp_gr.229401.117_Supplemental_Fig_S8.pdf]
