# Supplementary material for: Predicting human genes susceptible to genomic instability associated with Alu/Alu-mediated rearrangements
Source: HighWire-hosted journal article supplement (doi:10.1101/gr.229401.117), 2018-06-15
Supplement: Supplemental_Table_S1.xlsx [file Supplemental_Table_S1.xlsx]

## Sheet: Legend
Supplemental Table S1. 219 Alu/Alu mediated deletions that were validated at a single-base level by previous studies. For each deletion, we annotated the coordinates (both hg19 and hg38), Alu family group and strand direction of the 5 and 3 Alu elements at the breakpoints. We also documented the genes that are interrupted by the deletion, the deletion size in bp, the reference literature using PM…

## Sheet: GRCh37_hg19
No	5' Alu Coordinate	5' Alu Family	5' Alu Strand	3' Alu Coordinate	3' Alu Family	3' Alu Strand	Gene	Deletion Size (bp)	PMID	5' Microhomology	3' Microhomology	Microhomology Sequence	Microhomology Size (bp)	Microhomology strand
1	chr1:161137345-161137652	AluSg	-	chr1:161138449-161138753	AluSz	-	PPOX	1099	23324528	chr1:161137576-161137587	chr1:161138675-161138686	AACTCCTGACCT	12	+
2	chr1:161279345-161279481	FLAM_C	-	chr1:161299110-161299421	AluSz6	-	MPZ|SDHC	19940	26378787	chr1:161279434-161279456	chr1:161299374-161299396	GGCCTCCCAAAGTGCTGGGATTA	23	+
3	chr2:170355046-170355338	AluYc3	+	chr2:170364796-170365092	AluSg	+	BBS5	9754	27486776	chr2:170355189-170355194	chr2:170364950-170364955	CCTGTA	6	+
4	chr2:32274717-32275008	AluSx	-	chr2:32291040-32291338	AluSx3	-	SPAST	16335	25065914	chr2:32274907-32274915	chr2:32291242-32291250	CCATGTTGG	9	+
5	chr2:32282586-32282885	AluSz	-	chr2:32303037-32303301	AluY	-	SPAST	20475	25065914	chr2:32282767-32282772	chr2:32303242-32303247	GTAGAG	6	+
6	chr2:32282586-32282885	AluSz	-	chr2:32295138-32295436	AluSz	-	SPAST	12551	25065914	chr2:32282839-32282864	chr2:32295390-32295415	GCCTCCCAAAGTGCTGGGATTACAGG	26	+
7	chr2:32288094-32288266	AluSx3	-	chr2:32292127-32292430	AluSz	-	SPAST	4034	25065914	chr2:32288214-32288218	chr2:32292248-32292252	AGCCT	5	+
8	chr2:32291761-32292073	AluJo	+	chr2:32357177-32357484	AluJb	+	SPAST	65416	25065914	chr2:32291771-32291789	chr2:32357187-32357205	GGTGGCTCATGCCTGTAAT	19	+
9	chr2:32291761-32292073	AluJo	+	chr2:32364615-32364931	AluSx1	+	SPAST	72854	25065914	chr2:32291791-32291812	chr2:32364645-32364666	CCAGCACTTTGGGAGGCTGAGG	22	+
10	chr2:32301941-32302241	AluSg4	-	chr2:32350859-32351173	AluY	-	SPAST	48921	25065914	chr2:32302134-32302142	chr2:32351055-32351063	GGGGTTTCA	9	+
11	chr2:32308049-32308320	AluSx1	-	chr2:32341534-32341835	AluSz	-	SPAST	33495	25065914	chr2:32308137-32308174	chr2:32341632-32341669	TTCAAGTGATTCTCCTGCCTCAGCCTCCCAAGTAGCTG	38	+
12	chr2:32338205-32338453	AluSx	-	chr2:32340027-32340312	AluSp	-	SPAST	1863	25065914	chr2:32338420-32338439	chr2:32340283-32340302	CTGGGATTACAGGCGTGAGC	20	+
13	chr2:32347383-32347688	AluSz6	-	chr2:32392143-32392443	AluSp	-	SPAST|SLC30A6	44753	25065914	chr2:32347610-32347633	chr2:32392363-32392386	CGAACTCCTGACCTCAGGTGATCC	24	+
14	chr2:32350859-32351173	AluY	-	chr2:32360218-32360497	AluY	-	SPAST	9335	25065914	chr2:32350951-32350955	chr2:32360286-32360290	CCTCC	5	+
15	chr2:32353052-32353363	AluSz	-	chr2:32359769-32360064	AluSx	-	SPAST	6701	25065914	chr2:32353189-32353223	chr2:32359890-32359924	GAGTAGCTGGGATTACAGGCATGCGCCACCACGCC	35	+
16	chr2:32356736-32357027	AluSc	-	chr2:32372688-32372999	AluY	-	SPAST	15971	25065914	chr2:32356937-32356950	chr2:32372908-32372921	GCCAGGATGGTCTC	14	+
17	chr2:32360218-32360497	AluY	-	chr2:32381110-32381405	AluSp	-	SPAST	20909	25065914	chr2:32360303-32360335	chr2:32381212-32381244	ATTCTCCTGCCTCAGCCTCCCGAGTAGCTGGGA	33	+
18	chr2:32365463-32365703	AluSz6	+	chr2:32371654-32371949	AluSg	+	SPAST	6241	25065914	chr2:32365565-32365595	chr2:32371806-32371836	CACCTGTAATCCCAGCTACTCAGGAGGCTGA	31	+
19	chr2:32370163-32370465	AluJb	-	chr2:32401837-32402141	AluSz	-	SPAST|SLC30A6	31676	25065914	chr2:32370414-32370431	chr2:32402090-32402107	CCTTGGCCTCCCAAAGTG	18	+
20	chr2:32371654-32371949	AluSg	+	chr2:32373597-32373894	AluY	+	SPAST	1959	25065914	chr2:32371901-32371914	chr2:32373860-32373873	ACAGAGCAAGACTC	14	+
21	chr2:32372688-32372999	AluY	-	chr2:32398445-32398730	AluSx3	-	SPAST|SLC30A6	25742	25065914	chr2:32372805-32372825	chr2:32398547-32398567	ATTCTCCTGCCTCAGCCTCCC	21	+
22	chr2:32372688-32372999	AluY	-	chr2:32390281-32390572	AluSz	-	SPAST	17574	25065914	chr2:32372827-32372837	chr2:32390401-32390411	AGTAGCTGGGA	11	+
23	chr2:32373597-32373894	AluY	+	chr2:32384365-32384638	AluY	+	SPAST	10768	21659953	chr2:32373675-32373682	chr2:32384443-32384450	GAGACCAT	8	+
24	chr2:32376021-32376310	AluSp	-	chr2:32381110-32381405	AluSp	-	SPAST	5094	25065914	chr2:32376108-32376115	chr2:32381202-32381209	GGTTCAAG	8	+
25	chr2:32378388-32378684	AluSx1	-	chr2:32381110-32381405	AluSp	-	SPAST	2721	25065914	chr2:32378553-32378567	chr2:32381274-32381288	TTTTGTATTTTTAGT	15	+
26	chr2:32378388-32378684	AluSx1	-	chr2:32403014-32403315	AluY	-	SPAST|SLC30A6	24631	25065914	chr2:32378629-32378635	chr2:32403260-32403266	CCCGCCT	7	+
27	chr2:32378388-32378684	AluSx1	-	chr2:32396750-32397062	AluSp	-	SPAST|SLC30A6	18378	25065914	chr2:32378670-32378678	chr2:32397048-32397056	CCACCGTGC	9	+
28	chr2:32378864-32379087	AluSx	+	chr2:32384365-32384638	AluY	+	SPAST	5501	21659953	chr2:32378886-32378911	chr2:32384387-32384412	CTGTAATCCCAGCACTTTGGGAGGCC	26	+
29	chr2:47601769-47602073	AluSq	-	chr2:47617601-47617826	AluSx1	-	MIR559|EPCAM	15828	21309036	chr2:47601822-47601828	chr2:47617650-47617656	GCCCAGG	7	+
30	chr2:47602847-47603142	AluSg	-	chr2:47614507-47614701	AluSx1	-	MIR559|EPCAM	11660	21309036	chr2:47602941-47602966	chr2:47614601-47614626	TTCAAGCGATTCTCCTGCCTCAGCCT	26	+
31	chr2:47603394-47603695	AluSp	-	chr2:47627231-47627514	AluSx1	-	MIR559|EPCAM	23820	21309036	chr2:47603655-47603678	chr2:47627475-47627498	TCCCAAAGTGCTGGGATTACAGGC	24	+
32	chr2:47604369-47604675	AluSz6	-	chr2:47614712-47615030	AluSz	-	MIR559|EPCAM	10355	21309036	chr2:47604606-47604617	chr2:47614961-47614972	CCTCAAGTGATC	12	+
33	chr2:47605090-47605391	AluY	+	chr2:47618218-47618511	AluSx	+	EPCAM	13128	21309036	chr2:47605102-47605116	chr2:47618230-47618244	TGGCTCACGCCTGTA	15	+
34	chr2:47605090-47605391	AluY	+	chr2:47627927-47628215	AluSc	+	EPCAM	22836	21309036	chr2:47605111-47605142	chr2:47627947-47627978	CCTGTAATCCCAGCACTTTGGGAGGCCGAGGC	32	+
35	chr2:47605428-47605740	AluSp	-	chr2:47614507-47614701	AluSx1	-	EPCAM	9064	23801599	chr2:47605537-47605559	chr2:47614601-47614623	TTCAAGCGATTCTCCTGCCTCAG	23	+
36	chr2:47608254-47608555	AluSp	+	chr2:47618218-47618511	AluSx	+	EPCAM	9963	21309036	chr2:47608311-47608318	chr2:47618274-47618281	GGATCACC	8	+
37	chr2:47608254-47608555	AluSp	+	chr2:47618218-47618511	AluSx	+	EPCAM	9963	21309036	chr2:47608334-47608351	chr2:47618297-47618314	GAGACCAGCCTGACCAAC	18	+
38	chr2:47609544-47609852	AluSp	+	chr2:47618218-47618511	AluSx	+	EPCAM	8674	21309036	chr2:47609572-47609585	chr2:47618246-47618259	TCCCAGCACTTTGG	14	+
39	chr2:47609544-47609852	AluSp	+	chr2:47624417-47624581	AluSp	+	EPCAM	14734	21309036	chr2:47609766-47609780	chr2:47624500-47624514	AGTGAGCCGAGATCA	15	+
40	chr2:47610467-47610740	AluSg	-	chr2:47615681-47615937	AluSq2	-	EPCAM	5246	21309036	chr2:47610610-47610622	chr2:47615856-47615868	TTTTTGTATTTTT	13	+
41	chr2:47610467-47610740	AluSg	-	chr2:47619402-47619620	AluSx1	-	EPCAM	8879	21309036	chr2:47610690-47610699	chr2:47619569-47619578	CCTCGGCCTC	10	+
42	chr2:47610762-47611075	AluSx	-	chr2:47615681-47615937	AluSq2	-	EPCAM	4909	21309036	chr2:47610837-47610842	chr2:47615746-47615751	GATCTC	6	+
43	chr2:47611545-47611845	AluSx1	-	chr2:47617601-47617826	AluSx1	-	EPCAM	6058	21309036	chr2:47611592-47611608	chr2:47617650-47617666	GCCCAGGCTGGAGTGCA	17	+
44	chr2:47611545-47611845	AluSx1	-	chr2:47628381-47628689	AluSx1	-	EPCAM	16834	23801599	chr2:47611592-47611615	chr2:47628426-47628449	GCCCAGGCTGGAGTGCAATGGCGC	24	+
45	chr2:47611545-47611845	AluSx1	-	chr2:47614190-47614496	AluSx4	-	EPCAM	2648	21309036	chr2:47611617-47611634	chr2:47614265-47614282	ATCTCGGCTCACTGCAAC	18	+
46	chr2:47611545-47611845	AluSx1	-	chr2:47624585-47624722	AluSx	-	EPCAM	13004	21309036	chr2:47611646-47611659	chr2:47624650-47624663	GGGTTCAAGTGATT	14	+
47	chr2:47631845-47632146	AluSz	-	chr2:47668467-47668772	AluSz6	-	MSH2	36627	16541406	chr2:47632095-47632106	chr2:47668722-47668733	CCTTGGCCTCCC	12	+
48	chr2:47636524-47636800	AluSc5	-	chr2:47637906-47638202	AluSg7	-	MSH2	1403	16541406	chr2:47636753-47636766	chr2:47638156-47638169	GGCCTCCCAAAGTG	14	+
49	chr2:47636831-47637125	AluSg	+	chr2:47639010-47639311	AluSx	+	MSH2	2179	16541406	chr2:47636841-47636861	chr2:47639020-47639040	GGTGGCTCACACCTGTAATCC	21	+
50	chr2:47637906-47638202	AluSg7	-	chr2:47653283-47653455	AluY	-	MSH2	15381	16541406	chr2:47638016-47638049	chr2:47653397-47653430	CTGCCTCAGCCTCCTGAGTAGCTGGGATTACAGG	34	+
51	chr2:47641747-47642015	AluSx1	-	chr2:47651359-47651668	AluSx	-	MSH2	9655	23484096	chr2:47641902-47641912	chr2:47651557-47651567	GACAGGGTTTC	11	+
52	chr2:47656462-47656762	AluSp	-	chr2:47663127-47663423	AluSz6	-	MSH2	6665	16541406	chr2:47656653-47656660	chr2:47663318-47663325	GGGGTTTC	8	+
53	chr3:10072906-10073205	AluY	+	chr3:10232697-10232991	AluY	+	FANCD2|FANCD2OS|BRK1|VHL|IRAK2|RNU6-670P|CYCSP11	159793	19280651	chr3:10073136-10073164	chr3:10232929-10232957	AGATCGCGCCACTGCACTCCAGCCTGGGC	29	+
54	chr3:10109199-10109500	AluSx1	+	chr3:10299033-10299282	AluSx	+	FANCD2|FANCD2OS|BRK1|VHL|IRAK2|TATDN2|RNU6-814P	189833	19280651	chr3:10109281-10109301	chr3:10299114-10299134	AGACCAGCCTGGCCAACATGG	21	+
55	chr3:10120033-10120337	AluY	-	chr3:10223959-10224264	AluY	-	FANCD2|FANCD2OS|BRK1|VHL|IRAK2	103928	19280651	chr3:10120171-10120186	chr3:10224099-10224114	TGGGACTACAGGTGCC	16	+
56	chr3:10161716-10161880	AluSx4	-	chr3:10213454-10213639	AluSx	-	BRK1|VHL|IRAK2	51736	19280651	chr3:10161817-10161821	chr3:10213553-10213557	GATTC	5	+
57	chr3:10168990-10169289	AluY	+	chr3:10239602-10239913	AluY	+	VHL|IRAK2	70613	19280651	chr3:10169088-10169096	chr3:10239701-10239709	GTGAAACCC	9	+
58	chr3:10172501-10172793	AluSz	+	chr3:10186641-10186893	AluSx	+	VHL	14086	19280651	chr3:10172711-10172716	chr3:10186797-10186802	GAACCT	6	+
59	chr3:10175645-10175927	AluSq2	+	chr3:10232697-10232991	AluY	+	VHL|IRAK2	57053	19280651	chr3:10175664-10175680	chr3:10232717-10232733	GCCTGTAATCCCAGCAC	17	+
60	chr3:10178701-10179001	AluY	+	chr3:10187108-10187419	AluY	+	VHL	8407	19280651	chr3:10178779-10178795	chr3:10187186-10187202	GAGACCATCCTGGCTAA	17	+
61	chr3:10179792-10180095	AluY	-	chr3:10184023-10184327	AluSg	-	VHL	4237	19280651	chr3:10179814-10179845	chr3:10184051-10184082	ACGGAGTCTCGCTCTGTCGCCCAGGCTGGAGT	32	+
62	chr3:10179792-10180095	AluY	-	chr3:10209099-10209398	AluY	-	VHL|IRAK2	29303	19280651	chr3:10180055-10180084	chr3:10209358-10209387	CAAAGTGCTGGGATTACAGGCGTGAGCCAC	30	+
63	chr3:10180214-10180517	AluJb	-	chr3:10199822-10200133	AluY	-	VHL	19616	19280651	chr3:10180370-10180389	chr3:10199986-10200005	CCACGCCCGGCTAATTTTTT	20	+
64	chr3:10184023-10184327	AluSg	-	chr3:10189995-10190297	AluYa5	-	VHL	5969	19280651	chr3:10184047-10184091	chr3:10190016-10190060	TGAGACGGAGTCTCGCTCTGTCGCCCAGGCTGGAGTGCAGTGGCG	45	+
65	chr3:10184023-10184327	AluSg	-	chr3:10189044-10189348	AluSx1	-	VHL	5021	19280651	chr3:10184281-10184298	chr3:10189302-10189319	GCCTCCCAAAGTGCTGGG	18	+
66	chr3:10184023-10184327	AluSg	-	chr3:10201726-10202036	AluSz	-	VHL	17709	19280651	chr3:10184283-10184298	chr3:10201992-10202007	CTCCCAAAGTGCTGGG	16	+
67	chr3:10184802-10185112	AluSx	-	chr3:10190785-10191096	AluJo	-	VHL	5984	19280651	chr3:10185063-10185078	chr3:10191047-10191062	TTGGCCTCCCAAAGTG	16	+
68	chr3:10187108-10187419	AluY	+	chr3:10194545-10194679	AluSx	+	VHL	7437	19280651	chr3:10187154-10187155	chr3:10194591-10194592	CC	2	+
69	chr3:10187108-10187419	AluY	+	chr3:10217293-10217602	AluY	+	VHL|IRAK2	30184	19280651	chr3:10187248-10187257	chr3:10217432-10217441	GGCGTGGTGG	10	+
70	chr3:10187858-10188157	AluY	-	chr3:10189995-10190297	AluYa5	-	VHL	2141	19280651	chr3:10187876-10187887	chr3:10190017-10190028	GAGACGGAGTCT	12	+
71	chr3:10187858-10188157	AluY	-	chr3:10189995-10190297	AluYa5	-	VHL	2141	19280651	chr3:10187935-10187943	chr3:10190076-10190084	GCAAGCTCC	9	+
72	chr3:10187858-10188157	AluY	-	chr3:10189995-10190297	AluYa5	-	VHL	2141	19280651	chr3:10187984-10188004	chr3:10190125-10190145	AGTAGCTGGGACTACAGGCGC	21	+
73	chr3:10187858-10188157	AluY	-	chr3:10188698-10188993	AluSc8	-	VHL	836	19280651	chr3:10188051-10188059	chr3:10188887-10188895	GGTTTCACC	9	+
74	chr3:10188698-10188993	AluSc8	-	chr3:10192564-10192864	AluSx	-	VHL	3882	19280651	chr3:10188739-10188758	chr3:10192621-10192640	AGGCTGGAGTGCAGTGGCGC	20	+
75	chr3:10188698-10188993	AluSc8	-	chr3:10192564-10192864	AluSx	-	VHL	3882	19280651	chr3:10188761-10188780	chr3:10192643-10192662	TCTCGGCTCACTGCAACCTC	20	+
76	chr3:10189995-10190297	AluYa5	-	chr3:10207406-10207712	AluY	-	VHL|IRAK2	17414	19280651	chr3:10190210-10190218	chr3:10207624-10207632	GGATGGTCT	9	+
77	chr3:10190785-10191096	AluJo	-	chr3:10199287-10199588	AluSz	-	VHL	8493	19280651	chr3:10190988-10190994	chr3:10199481-10199487	GGGTTTC	7	+
78	chr3:136007496-136007632	AluJo	-	chr3:138671861-138672155	AluSz	-	FOXL2|C3orf72|PCCB|STAG1|RNU6-1284P|RNY4P4|HMGN1P10|RNU7-198P|RNU6-789P|IL20RB-AS1|RNA5SP142|NPM1P17|HSPA8P9|KRT8P36|GAPDHP39|RPL23AP40|SLC35G2|NCK1|EEF1A1P25|ATP5G1P3|IL20RB|SOX14|CLDN18|DZIP1L|A4GNT|DBR1|ARMC8|NME9|MRAS|ESYT3|CEP70|FAIM|PIK3CB	2664380	23516377	chr3:136007508-136007541	chr3:138671888-138671921	GTCTCACTCTGTTGCCCAGGCTGGAGTGCAGTGG	34	+
79	chr3:137894344-137894645	AluSx3	+	chr3:139735361-139735664	AluSc	+	FOXL2|C3orf72|PRR23A|MRPS22|PRR23B|PRR23C|COPB2|RBP2|RBP1|NMNAT3|CLSTN2|GAPDHP39|RPL23AP40|EEF1A1P25|ATP5G1P3|RPL7L1P7|BPESC1|RNU6-736P|ACTG1P1|RN7SKP124|RN7SL724P|TRMT112P5|ARMC8|NME9|MRAS|ESYT3|CEP70|FAIM|PIK3CB	1841023	23516377	chr3:137894386-137894396	chr3:139735409-139735419	GAGGCGGGCGG	11	+
80	chr3:137934685-137934997	AluSx3	-	chr3:142100406-142100707	AluSz6	-	FOXL2|C3orf72|PRR23A|MRPS22|PRR23B|PRR23C|COPB2|RBP2|RBP1|NMNAT3|CLSTN2|TRIM42|SLC25A36|SPSB4|ACPL2|ZBTB38|GAPDHP39|RPL23AP40|RASA2|EEF1A1P25|ATP5G1P3|RPL7L1P7|BPESC1|RNU6-736P|ACTG1P1|RNF7|GRK7|ATP1B3|TFDP2|RN7SKP124|RN7SL724P|TRMT112P5|CLSTN2-AS1|KRT18P35|RASA2-IT1|YWHAQP6|TPT1P3|HMGN2P25|RNU6-509P|ATP1B3-AS1|RNU6-425P|ARMC8|NME9|GK5|MRAS|XRN1|ESYT3|CEP70|FAIM|PIK3CB	4165518	23516377	chr3:137934888-137934912	chr3:142100406-142100430	TTTTTTTTTTTTTTTTTTTTTTAAG	25	+
81	chr3:138532273-138532558	AluY	-	chr3:140753356-140753649	AluY	-	FOXL2|C3orf72|PRR23A|MRPS22|PRR23B|PRR23C|COPB2|RBP2|RBP1|NMNAT3|CLSTN2|TRIM42|SLC25A36|EEF1A1P25|ATP5G1P3|RPL7L1P7|BPESC1|RNU6-736P|ACTG1P1|RN7SKP124|RN7SL724P|TRMT112P5|CLSTN2-AS1|PIK3CB	2221106	23516377	chr3:138532389-138532403	chr3:140753495-140753509	AGCTGGGACTACAGG	15	+
82	chr3:138602702-138602989	AluSp	-	chr3:142457825-142458115	AluSp	-	FOXL2|C3orf72|PRR23A|MRPS22|PRR23B|PRR23C|COPB2|RBP2|RBP1|NMNAT3|CLSTN2|TRIM42|SLC25A36|SPSB4|ACPL2|ZBTB38|RASA2|ATP5G1P3|RPL7L1P7|BPESC1|RNU6-736P|ACTG1P1|RNF7|GRK7|ATP1B3|TFDP2|RN7SKP124|RN7SL724P|TRMT112P5|CLSTN2-AS1|KRT18P35|RASA2-IT1|YWHAQP6|TPT1P3|HMGN2P25|RNU6-509P|ATP1B3-AS1|RNU6-425P|RNU6-1294P|RNU1-100P|RPL6P9|RNA5SP143|PLS1-AS1|RN7SKP25|GK5|XRN1|ATR|PLS1|TRPC1	3855121	23516377	chr3:138602857-138602882	chr3:142457978-142458003	GGCTAATTTTGTATTTTTAGTAGAGA	26	+
83	chr3:138741266-138741553	AluSz	-	chr3:141762194-141762382	AluSz	-	MRPS22|PRR23C|COPB2|RBP2|RBP1|NMNAT3|CLSTN2|TRIM42|SLC25A36|SPSB4|ACPL2|ZBTB38|RASA2|RPL7L1P7|BPESC1|RNU6-736P|ACTG1P1|RNF7|GRK7|ATP1B3|TFDP2|RN7SKP124|RN7SL724P|TRMT112P5|CLSTN2-AS1|KRT18P35|RASA2-IT1|YWHAQP6|TPT1P3|HMGN2P25|RNU6-509P|ATP1B3-AS1	3020948	23516377	chr3:138741282-138741293	chr3:141762230-141762241	GAGTCTCACTCT	12	+
84	chr3:37049638-37049932	AluSx	-	chr3:37052034-37052341	AluSx	-	MLH1	2409	18792805	chr3:37049840-37049872	chr3:37052249-37052281	CCAGGCTGGTCTCGAACTCCTGACCTCAGGTGA	33	+
85	chr3:98301328-98301634	AluY	-	chr3:98304709-98305014	AluY	-	CPOX	3381	21231929	chr3:98301604-98301625	chr3:98304985-98305006	GGATTACAGGCGTGAGCCACCA	22	+
86	chr3:9992197-9992486	AluSx	-	chr3:10241569-10241871	AluSx	-	PRRT3|EMC3|FANCD2|FANCD2OS|BRK1|VHL|IRAK2|PRRT3-AS1|EMC3-AS1|CYCSP10|CIDECP|RNU6-670P|CYCSP11	249385	19280651	chr3:9992281-9992311	chr3:10241666-10241696	GGTTCAAGTGATTCTCCTGCCTCAGCCTCCC	31	+
87	chr6:10539414-10539721	AluSp	-	chr6:10632498-10632722	AluSx1	-	GCNT2	93001	21761136	chr6:10539590-10539618	chr6:10632591-10632619	TTTTGTATTTTTAGTAGAGACGGGGTTTC	29	+
88	chr6:26043016-26043327	AluY	-	chr6:26099113-26099413	AluSz	-	HIST1H2BB|HIST1H3C|HIST1H1C|HFE	56083	25284364	chr6:26043065-26043078	chr6:26099148-26099161	TCACCCAGGCTGGA	14	+
89	chr6:26067317-26067583	AluSc	-	chr6:26100041-26100337	AluSg	-	HFE	32745	18809761	chr6:26067446-26067462	chr6:26100191-26100207	CCACCACGCCCAGCTAA	17	+
90	chr8:118845574-118845873	AluSg	+	chr8:118993815-118994109	AluSz6	+	EXT1	148255	21703028	chr8:118845638-118845673	chr8:118993893-118993928	GAGGTCAGGAGTTCAAGACCAGCCTGGCCAACATGG	36	+
91	chr9:27040267-27040568	AluSz	+	chr9:27060675-27060989	AluY	+	IFT74	20421	27486776	chr9:27040539-27040563	chr9:27060956-27060980	TCTCAAAAAAAAAAAAAAAAAAAAA	25	+
92	chr9:34280001-34280310	AluYa5	+	chr9:34296243-34296548	AluY	+	KIF24|RNU2-50P	16242	26378787	chr9:34280036-34280053	chr9:34296278-34296295	ACTTTGGGAGGCCGAGGC	18	+
93	chr10:12959184-12959495	AluYk4	-	chr10:13140711-13141014	AluSx4	-	RNA5SP300|RPL5P25|CCDC3	181519	26740941	chr10:12959448-12959484	chr10:13140967-13141003	GGCCTCCCAAAGTGCTGGGATTACAGGCGTGAGCCAC	37	+
94	chr10:13150545-13150845	AluY	-	chr10:13153845-13154147	AluY	-	OPTN	3301	22402017	chr10:13150709-13150714	chr10:13154010-13154015	GCTAAT	6	+
95	chr10:13151544-13151860	AluJb	+	chr10:13153416-13153706	AluSx	+	OPTN	1872	22402017	chr10:13151625-13151636	chr10:13153497-13153508	AGACCAGCCTGG	12	+
96	chr11:108003300-108003608	AluY	+	chr11:108005090-108005390	AluSc	+	ACAT1	1790	23920042	chr11:108003321-108003355	chr11:108005111-108005145	CCTGTAATCCCAGCACTTTGGGAGGCCGAGGCAGG	35	+
97	chr11:111948563-111948867	AluSg	-	chr11:111958915-111959237	AluSx1	-	C11orf57|TIMM8B|SDHD	10353	19546167	chr11:111948797-111948803	chr11:111959150-111959156	TGACCTC	7	+
98	chr11:44186427-44186727	AluYa5	-	chr11:44195107-44195416	AluY	-	EXT2	8689	21703028	chr11:44186675-44186706	chr11:44195364-44195395	GCCTCGGCCTCCCAAAGTGCTGGGATTACAGG	32	+
99	chr11:47352609-47352908	AluSx	-	chr11:47356117-47356413	AluSz	-	MYBPC3	3505	22820391	chr11:47352809-47352827	chr11:47356314-47356332	ATGTTGGCCAGGCTGGTCT	19	+
100	chr11:57368147-57368438	AluSx	+	chr11:57371341-57371627	AluSz	+	SERPING1	3181	1656734	chr11:57368410-57368436	chr11:57371591-57371617	CGAGACTCTGTCTCAAAAAAAAAAAAA	27	+
101	chr11:57368147-57368438	AluSx	+	chr11:57370735-57371029	AluSx3	+	SERPING1	2596	1656734	chr11:57368412-57368433	chr11:57371008-57371029	AGACTCTGTCTCAAAAAAAAAA	22	+
102	chr11:66274657-66274959	AluY	+	chr11:66292390-66292685	AluY	+	DPP3|BBS1|ZDHHC24	17726	24746959	chr11:66274888-66274891	chr11:66292621-66292624	AGAT	4	+
103	chr11:66296158-66296469	AluSp	+	chr11:66304061-66304375	AluSp	+	BBS1|ZDHHC24	7906	27486776	chr11:66296356-66296370	chr11:66304262-66304276	TTGAACCCGGGAGGC	15	+
104	chr11:67814471-67814786	AluSx1	-	chr11:67815752-67816060	AluSx1	-	TCIRG1	1283	18715141	chr11:67814714-67814718	chr11:67815997-67816001	GTGAT	5	+
105	chr12:102146749-102147055	AluSq2	+	chr12:102147646-102147873	AluSx	+	GNPTAB	897	23430906	chr12:102146807-102146827	chr12:102147704-102147724	GATCACCTGAGGTCAGGAGTT	21	+
106	chr12:103284579-103284874	AluSx	+	chr12:103289343-103289647	AluSx	+	PAH	4764	16931086	chr12:103284588-103284598	chr12:103289352-103289362	CTGTGGCTCAC	11	+
107	chr12:42869979-42870282	AluSp	-	chr12:42899228-42899537	AluSx	-	PRICKLE1	29254	26378787	chr12:42870187-42870202	chr12:42899441-42899456	TTGGTCAGGCTGGTCT	16	+
108	chr15:44856192-44856490	AluSx1	-	chr15:44858905-44859200	AluSx	-	SPG11	2710	22237444	chr15:44856460-44856481	chr15:44859170-44859191	GGATTACAGGCATGAGCCACTG	22	+
109	chr15:44861914-44862204	AluSx	-	chr15:44870213-44870528	AluY	-	SPG11	8323	22237444	chr15:44862154-44862195	chr15:44870477-44870518	CCTCGGCCTCCCAAAGTGCTGGGATTACAGGCGTGAGCCACC	42	+
110	chr15:44863686-44863994	AluY	-	chr15:44865176-44865482	AluSc8	-	SPG11	1489	22237444	chr15:44863695-44863722	chr15:44865184-44865211	TTTTTTTTTTTTTTTTTTTGAGATGGAG	28	+
111	chr15:44877506-44877821	AluY	+	chr15:44878562-44878857	AluSz	+	SPG11	1056	22237444	chr15:44877517-44877541	chr15:44878573-44878597	GTGGCTCACGCCTGTAATCCCAGCA	25	+
112	chr15:44877506-44877821	AluY	+	chr15:44878562-44878857	AluSz	+	SPG11	1042	27071356	chr15:44877674-44877679	chr15:44878716-44878721	CCTGTA	6	+
113	chr15:73000312-73000606	AluSc8	-	chr15:73006562-73006866	AluSx	-	BBS4	6260	27486776	chr15:73000565-73000586	chr15:73006825-73006846	CCAAAGTGCTGGGATTACAGGC	22	+
114	chr15:73006562-73006866	AluSx	-	chr15:73012088-73012381	AluSg	-	BBS4	5515	27486776	chr15:73006583-73006596	chr15:73012107-73012120	TTGAGACAGAGTCT	14	+
115	chr16:84350619-84350899	AluSx	+	chr16:87847517-87847802	AluY	+	COX6CP16|LINC00311|MIR5093|RN7SL381P|MIR1910|RNU1-103P|LINC01082|LINC01081|LINC00917|FENDRR|WFDC1|ATP2C2|TLDC1|COTL1|KLHL36|USP10|CRISPLD2|ZDHHC7|KIAA0513|FAM92B|GSE1|GINS2|C16orf74|EMC8|COX4I1|IRF8|FOXF1|MTHFSD|FOXC2|FOXL1|C16orf95|FBXO31|MAP1LC3B|ZCCHC14|JPH3|KLHDC4	3496878	19500772	chr16:84350698-84350709	chr16:87847576-87847587	AGACCAGCCTGG	12	+
116	chr16:84764583-84764884	AluSc8	-	chr16:86238548-86238860	AluY	-	COX6CP16|LINC00311|MIR5093|RN7SL381P|MIR1910|RNU1-103P|LINC01082|USP10|CRISPLD2|ZDHHC7|KIAA0513|FAM92B|GSE1|GINS2|C16orf74|EMC8|COX4I1|IRF8	1473974	24842713	chr16:84764628-84764646	chr16:86238602-86238620	CAGGCTGGAGTGCAGTGGC	19	+
117	chr16:84875209-84875499	AluSx1	-	chr16:86386562-86386879	AluSx	-	COX6CP16|LINC00311|MIR5093|RN7SL381P|MIR1910|RNU1-103P|LINC01082|LINC01081|LINC00917|CRISPLD2|ZDHHC7|KIAA0513|FAM92B|GSE1|GINS2|C16orf74|EMC8|COX4I1|IRF8	1511379	27071622	chr16:84875483-84875489	chr16:86386862-86386868	GAGCCAC	7	+
118	chr16:85148123-85148433	AluSq2	-	chr16:86646373-86646552	AluSq	-	COX6CP16|LINC00311|MIR5093|RN7SL381P|MIR1910|RNU1-103P|LINC01082|LINC01081|LINC00917|FENDRR|GSE1|GINS2|C16orf74|EMC8|COX4I1|IRF8|FOXF1|MTHFSD|FOXC2|FOXL1	1498240	19500772	chr16:85148264-85148280	chr16:86646504-86646520	CTGGGATTACAGGTGCC	17	+
119	chr16:85390266-85390397	FLAM_C	-	chr16:87964342-87964644	AluSc5	-	RN7SL381P|MIR1910|RNU1-103P|LINC01082|LINC01081|LINC00917|FENDRR|GSE1|GINS2|C16orf74|EMC8|COX4I1|IRF8|FOXF1|MTHFSD|FOXC2|FOXL1|C16orf95|FBXO31|MAP1LC3B|ZCCHC14|JPH3|KLHDC4|SLC7A5|CA5A	2574247	23505205	chr16:85390351-85390372	chr16:87964598-87964619	GCCTCCCAAAGTGCTGGGATTA	22	+
120	chr16:85816624-85816920	AluSx	+	chr16:86719427-86719764	AluSx1	+	LINC01082|LINC01081|LINC00917|FENDRR|EMC8|COX4I1|IRF8|FOXF1|MTHFSD|FOXC2|FOXL1	902800	19500772	chr16:85816707-85816724	chr16:86719507-86719524	GAGACCAGCCTGGCCAAC	18	+
121	chr16:85844787-85845087	AluSx	-	chr16:86877935-86878229	AluSg7	-	LINC01082|LINC01081|LINC00917|FENDRR|IRF8|FOXF1|MTHFSD|FOXC2|FOXL1	1033142	19500772	chr16:85845070-85845077	chr16:86878212-86878219	TGAGCCAC	8	+
122	chr16:86009826-86010128	AluY	+	chr16:87847517-87847802	AluY	+	LINC01082|LINC01081|LINC00917|FENDRR|FOXF1|MTHFSD|FOXC2|FOXL1|C16orf95|FBXO31|MAP1LC3B|ZCCHC14|JPH3|KLHDC4	1837670	27071622	chr16:86010040-86010060	chr16:87847710-87847730	GAGCTTGCAGTGAGCCGAGAT	21	+
123	chr16:86026968-86027272	AluSx	-	chr16:87198685-87199005	AluJb	-	LINC01082|LINC01081|LINC00917|FENDRR|FOXF1|MTHFSD|FOXC2|FOXL1|C16orf95	1171712	26703872	chr16:86027015-86027033	chr16:87198727-87198745	CCCAGGCTGGAGTGCAGTG	19	+
124	chr16:86055052-86055356	AluSp	-	chr16:86288115-86288338	AluSx1	-	LINC01082|LINC01081	233068	27071622	chr16:86055159-86055199	chr16:86288227-86288267	TTCTCCTGCCTCAGCCTCCCGAGTAGCTGGGATTACAGGCA	41	+
125	chr16:86090371-86090665	AluSx1	-	chr16:87920499-87920808	AluSx	-	LINC01082|LINC01081|LINC00917|FENDRR|FOXF1|MTHFSD|FOXC2|FOXL1|C16orf95|FBXO31|MAP1LC3B|ZCCHC14|JPH3|KLHDC4|SLC7A5	1830139	19500772	chr16:86090616-86090658	chr16:87920755-87920797	CGCCTCGGCCTCCCAAAGTGCTGGGATTACAGGCATGAGCCAC	43	+
126	chr16:86118110-86118403	AluJb	-	chr16:86287015-86287326	AluSx	-	LINC01082|LINC01081	168924	23034409	chr16:86118130-86118141	chr16:86287054-86287065	TCTCACTCTGTC	12	+
127	chr16:86147435-86147727	AluSz	-	chr16:86287015-86287326	AluSx	-	LINC01082|LINC01081	139594	23034409	chr16:86147526-86147566	chr16:86287120-86287160	GGGTTCAAGCGATTCTCCTGCCTCAGCCTCCCAAGTAGCTG	41	+
128	chr16:86182693-86183018	AluY	+	chr16:87651487-87651796	AluJb	+	LINC01082|LINC01081|LINC00917|FENDRR|FOXF1|MTHFSD|FOXC2|FOXL1|C16orf95|FBXO31|MAP1LC3B|ZCCHC14|JPH3	1468794	27071622	chr16:86182703-86182737	chr16:87651497-87651531	GGTGGCTCATGCCTGTAATCCCAGCACTTTGGGAG	35	+
129	chr16:86211878-86212178	AluSc	+	chr16:86447966-86448259	AluSq2	+	LINC01082|LINC01081|LINC00917	236092	23034409	chr16:86212040-86212067	chr16:86448132-86448159	CCAGCTACTTGGGAGGCTGAGGCAGGAG	28	+
130	chr16:86493481-86493755	AluY	+	chr16:86596343-86596630	AluY	+	FENDRR|FOXF1|MTHFSD	102864	19500772	chr16:86493531-86493549	chr16:86596395-86596413	AGACCATCCTGGCTAACAC	19	+
131	chr16:89644886-89645189	AluSz	+	chr16:89809950-89810256	AluSp	+	VPS9D1-AS1|CPNE7|DPEP1|CHMP1A|SPATA33|CDK10|SPATA2L|VPS9D1|ZNF276|FANCA	165063	25168418	chr16:89645026-89645036	chr16:89810089-89810099	GGCATGGTGGC	11	+
132	chr16:89722555-89722844	AluY	-	chr16:89897796-89898104	AluY	-	VPS9D1-AS1|CHMP1A|SPATA33|CDK10|SPATA2L|VPS9D1|ZNF276|FANCA|SPIRE2	175261	25168418	chr16:89722570-89722598	chr16:89897831-89897859	AGTCTCGCTCTGTCGCCCAGGCTGGAGTG	29	+
133	chr16:89729646-89729952	AluSp	-	chr16:89881446-89881743	AluSx1	-	VPS9D1-AS1|SPATA33|CDK10|SPATA2L|VPS9D1|ZNF276|FANCA	151792	25168418	chr16:89729918-89729943	chr16:89881710-89881735	GCTAGGATTACAGGCGTGAGCCACCA	26	+
134	chr16:89794615-89794800	AluSx	-	chr16:89978202-89978498	AluY	-	ZNF276|FANCA|SPIRE2|TCF25	183569	25168418	chr16:89794745-89794768	chr16:89978314-89978337	GCCTCAGCCTCCCGAGTAGCTGGG	24	+
135	chr16:89803648-89803949	AluSg	+	chr16:89825447-89825757	AluY	+	ZNF276|FANCA	21799	25168418	chr16:89803671-89803692	chr16:89825470-89825491	TGTAATCCCAGCACTTTGGGAG	22	+
136	chr16:89808937-89809067	AluY	+	chr16:89886565-89886859	AluSx1	+	FANCA|SPIRE2	77629	25168418	chr16:89808947-89808982	chr16:89886576-89886611	GTGGCTCACGCCTGTAATCCCAGCACTTTGGGAGGC	36	+
137	chr16:89813840-89814146	AluSg	+	chr16:89847801-89848113	AluY	+	FANCA	33973	25168418	chr16:89813862-89813882	chr16:89847835-89847855	ACTTTGGGAGGCCAAGGCGGG	21	+
138	chr16:89816489-89816567	AluJb	+	chr16:89820181-89820480	AluSx1	+	FANCA	3692	25168418	chr16:89816519-89816549	chr16:89820211-89820241	CCAGCACTTTGGGAGGCCGAGGCAGGCAGAT	31	+
139	chr16:89816609-89816913	AluY	+	chr16:89827546-89827856	AluY	+	FANCA	10938	25168418	chr16:89816686-89816692	chr16: 89827624-89827630	GAGACCA	7	+
140	chr16:89816916-89817196	AluSx1	+	chr16:89876450-89876748	AluY	+	FANCA	59550	25168418	chr16:89817119-89817135	chr16:89876669-89876685	TGCAGTGAGCCAAGATC	17	+
141	chr16:89817630-89817893	AluJb	+	chr16:89861756-89862065	AluSx3	+	FANCA	44128	25168418	chr16:89817649-89817657	chr16:89861777-89861785	CTGTAATCC	9	+
142	chr16:89818177-89818476	AluY	-	chr16:89933008-89933316	AluY	-	FANCA|SPIRE2	114838	25168418	chr16:89818220-89818264	chr16:89933058-89933102	CCAGGCTGGAGTGCAGTGGCACAATCTCGGCTCACTGCAAGCTCC	45	+
143	chr16:89820481-89820670	AluSx1	+	chr16:89905468-89905797	AluY	+	FANCA|SPIRE2	85150	25168418	chr16:89820632-89820642	chr16:89905782-89905792	AAAAAAAAAAA	11	+
144	chr16:89829229-89829360	AluY	+	chr16:89840857-89841162	AluY	+	FANCA	11628	25168418	chr16:89829319-89829339	chr16:89840947-89840967	GCTAACACGGTGAAACCCTGT	21	+
145	chr16:89829374-89829687	AluSc8	+	chr16:89842954-89843268	AluY	+	FANCA	13580	25168418	chr16:89829438-89829481	chr16:89843018-89843061	GAGGTCAGGAGATTGAGACCATCCTGGCTAACACAGTGAAACCC	44	+
146	chr16:89830065-89830358	AluSg	+	chr16:89848502-89848638	AluY	+	FANCA	18444	25168418	chr16:89830187-89830190	chr16:89848631-89848634	AAAA	4	+
147	chr16:89830065-89830358	AluSg	+	chr16:89837585-89837889	AluJb	+	FANCA	7526	25168418	chr16:89830213-89830232	chr16:89837739-89837758	CGCCTGTAGTCCCAGCTACT	20	+
148	chr16:89830371-89830664	AluSz6	+	chr16:89848639-89848933	AluY	+	FANCA	18270	25168418	chr16:89830410-89830421	chr16:89848680-89848691	GAGGCCAAGGCG	12	+
149	chr16:89838944-89839249	AluSx1	+	chr16:89867157-89867470	AluSx1	+	FANCA	28214	25168418	chr16:89839142-89839151	chr16:89867356-89867365	GCTTGAACCC	10	+
150	chr16:89840857-89841162	AluY	+	chr16:89876450-89876748	AluY	+	FANCA	35592	25168418	chr16:89840944-89840964	chr16:89876536-89876556	CTGGCTAACACGGTGAAACCC	21	+
151	chr16:89840857-89841162	AluY	+	chr16:89866153-89866419	AluYk4	+	FANCA	25263	25168418	chr16:89840966-89840979	chr16:89866229-89866242	GTCTCTACTAAAAA	14	+
152	chr16:89840857-89841162	AluY	+	chr16:89856528-89856856	AluSx	+	FANCA	15664	25168418	chr16:89841010-89841017	chr16:89856674-89856681	CGCCTGTA	8	+
153	chr16:89840857-89841162	AluY	+	chr16:89847801-89848113	AluY	+	FANCA	6946	25168418	chr16:89841063-89841076	chr16:89848009-89848022	GGGAGGCGGAGCTT	14	+
154	chr16:89847801-89848113	AluY	+	chr16:89849678-89849984	AluY	+	FANCA	1877	25168418	chr16:89847821-89847833	chr16:89849698-89849710	CCTGTAATCCCAG	13	+
155	chr16:89847801-89848113	AluY	+	chr16:89861411-89861734	AluSx	+	FANCA	13609	25168418	chr16:89847979-89848000	chr16:89861588-89861609	GAGGCTGAGGCAGGAGAATGGT	22	+
156	chr16:89848502-89848638	AluY	+	chr16:89849678-89849984	AluY	+	FANCA	1175	25168418	chr16:89848527-89848548	chr16:89849702-89849723	TAATCCCAGCACTTTGGGAGGC	22	+
157	chr16:89848502-89848638	AluY	+	chr16:89849678-89849984	AluY	+	FANCA	1175	25168418	chr16:89848611-89848624	chr16:89849786-89849799	GTCTCTACTAAAAA	14	+
158	chr16:89848639-89848933	AluY	+	chr16:89854589-89854868	AluSc	+	FANCA	5949	25168418	chr16:89848770-89848779	chr16:89854719-89854728	ATTAGCCAGG	10	+
159	chr16:89856857-89857174	AluSg	+	chr16:89867157-89867470	AluSx1	+	FANCA	10304	25168418	chr16:89857036-89857058	chr16:89867340-89867362	CTGAGGCAGGAGAATAGCTTGAA	23	+
160	chr16:89866153-89866419	AluYk4	+	chr16:89874012-89874316	AluY	+	FANCA	7890	25168418	chr16:89866265-89866276	chr16:89874155-89874166	GTGGCGGACGCC	12	+
161	chr16:89867157-89867470	AluSx1	+	chr16:89876450-89876748	AluY	+	FANCA	9290	25168418	chr16:89867319-89867338	chr16:89876609-89876628	TAGTCCCAGCTACTCGGGAG	20	+
162	chr16:89872325-89872620	AluSq2	-	chr16:89881446-89881743	AluSx1	-	FANCA	9124	25168418	chr16:89872392-89872396	chr16:89881516-89881520	CTCAC	5	+
163	chr16:89872325-89872620	AluSq2	-	chr16:89891772-89892079	AluY	-	FANCA|SPIRE2	19459	25168418	chr16:89872574-89872599	chr16:89892033-89892058	GCCTCCCAAAGTGCTGGGATTACAGG	26	+
164	chr16:89875319-89875613	AluY	-	chr16:89908110-89908431	AluSp	-	FANCA|SPIRE2	32792	25168418	chr16:89875425-89875437	chr16:89908217-89908229	TGCCTCAGCCTCC	13	+
165	chr16:89875319-89875613	AluY	-	chr16:89890848-89890977	AluY	-	FANCA|SPIRE2	15364	25168418	chr16:89875558-89875602	chr16:89890922-89890966	CCTGCCTCGGCCTCCCAAAGTGCTGGGATTACAGGTGTGAGCCAC	45	+
166	chr16:89875319-89875613	AluY	-	chr16:89890981-89891294	AluSx3	-	FANCA|SPIRE2	15681	25168418	chr16:89875566-89875592	chr16:89891247-89891273	GGCCTCCCAAAGTGCTGGGATTACAGG	27	+
167	chr16:89878462-89878767	AluY	+	chr16:89881069-89881378	AluSg	+	FANCA	2607	25168418	chr16:89878561-89878582	chr16:89881168-89881189	GTGAAACCCTGTCTCTACTAAA	22	+
168	chr16:89878773-89879078	AluSp	+	chr16:89887170-89887469	AluSq2	+	FANCA|SPIRE2	8387	25168418	chr16:89878794-89878824	chr16:89887181-89887211	CCTGTAATCCCAGCACTTTGGGAGGCCGAGG	31	+
169	chr17:1303902-1304212	AluSq	-	chr17:1867019-1867319	AluSp	-	CRK|MYO1C|INPP5K|PITPNA-AS1|RN7SL105P|MIR22HG|PITPNA|SLC43A2|SCARF1|RILP|PRPF8|TLCD2|WDR81|SERPINF2|SERPINF1|SMYD4|RPA1|RTN4RL1	563111	25908615	chr17:1303959-1303985	chr17:1867070-1867096	GGCTGGAGTGCAGTGGTGCGATCTCGG	27	+
170	chr17:1497870-1498181	AluYk4	-	chr17:2243880-2244177	AluY	-	RN7SL105P|MIR22HG|SLC43A2|MIR132|MIR212|RN7SL624P|HNRNPA1P16|SNORD91B|SNORD91A|SCARF1|RILP|PRPF8|TLCD2|WDR81|SERPINF2|SERPINF1|SMYD4|RPA1|RTN4RL1|DPH1|OVCA2|HIC1|SMG6|SRR|TSR1|SGSM2	745996	25908615	chr17:1498104-1498128	chr17:2244100-2244124	GATCTCCTGACCTCGTGATCCGCCC	25	+
171	chr17:15441623-15441927	AluY	+	chr17:18005655-18005957	AluSg	+	ZNF29P|UBE2SP1|CDRT15P2|ZSWIM5P1|RNA5SP436|IL6STP1|MEIS3P1|RPLP1P11|RNU6-314P|RNU6-862P|RN7SL442P|MIR1288|FTLP12|FAM211A-AS1|NEK4P2|RNASEH1P2|RNU6-405P|RN7SL620P|UPF3AP1|USP32P1|SRP68P1|FAM106CP|KRT16P2|KRT17P1|COTL1P1|TBC1D27|MPRIP-AS1|RNU6-767P|RN7SL775P|RPL13P12|TSEN15P1|RNU6-468P|SMCR2|RAI1-AS1|SMCR5|MIR33B|TVP23C-CDRT4|TVP23C|CDRT1|TRIM16|ZNF286A|TBC1D26|ADORA2B|ZSWIM7|TTC19|NCOR1|PIGL|CENPV…	2564032	15526218	chr17:15441676-15441705	chr17:18005708-18005737	GGGTGGATCATGAGGTCAGGAGATCGAGAC	30	+
172	chr17:17141770-17142067	AluSc	+	chr17:19676015-19676313	AluY	+	SLC47A2|MIEF2|ALDH3A1|TOP3A|ULK2|SMCR8|SHMT1|EVPLL|LGALS9C|FAM106A|TBC1D28|ZNF286B|TRIM16L|FBXW10|RPL13P12|TSEN15P1|RNU6-468P|SMCR2|RAI1-AS1|SMCR5|MIR33B|TVP23B|RPL7AP65|RPL21P121|TBC1D3P4|YWHAEP2|KRT17P2|KRT16P1|KRT16P4|PRPSAP2|TNPO1P2|NOS2P2|USP32P2|SRP68P2|CCDC144B|SLC5A10|RN7SL639P|FOXO3B|UBE2SP2|RN7SL627P|SNORD3B-1|SNORD3B-2|KYNUP2|SNORD3D|KYNUP1|SNORD3A|FAM83G|GRAP|GRAPL|SNORD3C|KYNUP3|EPN2…	2534237	15526218	chr17:17141926-17141946	chr17:19676163-19676183	CGCCTGTAGTCCCAGCTACTC	21	+
173	chr17:29425377-29425598	AluSq2	-	chr17:29575550-29575836	AluSz	-	NF1	150170	26189818	chr17:29425477-29425506	chr17:29575647-29575676	GGTTCAAGTGATTCTCCTGCCTCAGCCTCC	30	+
174	chr17:29470828-29471140	AluY	-	chr17:29484027-29484306	AluSx	-	NF1	13165	26189818	chr17:29470905-29470912	chr17:29484070-29484077	TCTCGGCT	8	+
175	chr17:29477768-29478080	AluSx	+	chr17:29484696-29484993	AluY	+	NF1	6928	26189818	chr17:29477778-29477815	chr17:29484706-29484743	GGTGGCTCACGCCTGTAATCCCAGCACTTTGGGAGGCC	38	+
176	chr17:29484696-29484993	AluY	+	chr17:29489213-29489460	AluSq2	+	NF1	4517	26189818	chr17:29484707-29484743	chr17:29489224-29489260	GTGGCTCACGCCTGTAATCCCAGCACTTTGGGAGGCC	37	+
177	chr17:29488772-29489078	AluSz	+	chr17:29500153-29500455	AluY	+	NF1	11374	26189818	chr17:29488944-29488966	chr17:29500318-29500340	CTTGGGAGGCTGAGGCAGGAGAA	23	+
178	chr17:29489213-29489460	AluSq2	+	chr17:29501847-29502150	AluSg	+	NF1	12767	26189818	chr17:29489230-29489247	chr17:29501997-29502014	CACGCCTGTAATCCCAGC	18	+
179	chr17:29489213-29489460	AluSq2	+	chr17:29500018-29500152	AluSx	+	NF1	10805	26189818	chr17:29489234-29489253	chr17:29500039-29500058	CCTGTAATCCCAGCACTTTG	20	+
180	chr17:29561410-29561717	AluY	+	chr17:29565476-29565770	AluSc8	+	NF1	4063	26189818	chr17:29561647-29561687	chr17:29565710-29565750	CCACTGCACTCCAGCCTGGGCGACAGAGCGAGACTCTGTCT	41	+
181	chr17:41254375-41254671	AluSc5	-	chr17:41344038-41344335	AluSg	-	NBR2|BRCA1|NBR1	89664	23223007	chr17:41254415-41254434	chr17:41344079-41344098	CCAGGCTGGAGTGCAGTGGC	20	+
182	chr17:5560203-5560503	AluY	+	chr17:7996896-7997238	AluSp	+	CHD3|KCNAB3|TRAPPC1|CNTROB|GUCY2D|ALOX15B|ALOX12B|WSCD1|AIPL1|FAM64A|PITPNM3|KIAA0753|TXNDC17|MED31|C17orf100|SLC13A5|XAF1|FBXO39|TEKT1|ALOX12|RNASEK|RNASEK-C17orf49|C17orf49|BCL6B|SLC16A13|SLC16A11|CLEC10A|ASGR2|ASGR1|DLG4|ACADVL|DVL2|PHF23|GABARAP|CTDNEP1|ELP5|RNU6-1264P|BTF3P14|RNA5SP435|CLDN7|MIR4520B|MIR4520A|RPL23AP73|ALOX12P2|MIR497HG|RPL7AP64|MIR324|SLC2A4|SENP3-EIF4A1|SNORA67|SNORA48|SNO…	2436735	21056402	chr17:5560203-5560211	chr17:7996896-7996904	GGCCAGGCG	9	+
183	chr17:6571769-6572075	AluSx3	-	chr17:7626275-7626586	AluY	-	SLC13A5|XAF1|FBXO39|TEKT1|ALOX12|RNASEK|RNASEK-C17orf49|C17orf49|BCL6B|SLC16A13|SLC16A11|CLEC10A|ASGR2|ASGR1|DLG4|ACADVL|DVL2|PHF23|GABARAP|CTDNEP1|ELP5|CLDN7|RPL23AP73|ALOX12P2|MIR497HG|RPL7AP64|MIR324|SLC2A4|SENP3-EIF4A1|SNORA67|SNORA48|SNORD10|YBX2|EIF5A|GPS2|NEURL4|ACAP1|KCTD11|TMEM95|TNK1|TMEM256-PLSCR3|TMEM256|NLGN2|SPEM1|C17orf74|TMEM102|FGF11|CHRNB1|ZBTB4|SLC35G6|POLR2A|TNFSF12|TNFSF12-TN…	1054512	25439725	chr17:6572057-6572064	chr17:7626569-7626576	TGAGCCAC	8	+
184	chr17:7488572-7488869	AluSx	+	chr17:8031221-8031531	AluSz6	+	CHD3|KCNAB3|TRAPPC1|CNTROB|GUCY2D|ALOX15B|ALOX12B|ALOXE3|HES7|RPL29P2|SCARNA21|MIR4314|MPDU1|SOX15|FXR2|SHBG|SAT2|ATP1B2|TP53|WRAP53|EFNB3|DNAH2|KDM6B|TMEM88|LSMD1|CYB5D1	542662	21056402	chr17:7488644-7488674	chr17:8031292-8031322	CAGGAGTTCGAGACCAGCCTGGCCAACATGG	31	+
185	chr17:814574-814867	AluY	-	chr17:1425364-1425664	AluYb8	-	NXN|TIMM22|ABR|BHLHA9|TUSC5|YWHAE|CRK|MYO1C|INPP5K|MIR3183|PITPNA-AS1|PITPNA	610796	25908615	chr17:814772-814803	chr17:1425568-1425599	TGTTAGCCAGGATGGTCTCGATCTCCTGACCT	32	+
186	chr17:903143-903423	AluSg	-	chr17:1497870-1498181	AluYk4	-	TIMM22|ABR|BHLHA9|TUSC5|YWHAE|CRK|MYO1C|INPP5K|MIR3183|PITPNA-AS1|PITPNA|SLC43A2	594758	25908615	chr17:903349-903365	chr17:1498107-1498123	CTCCTGACCTCGTGATC	17	+
187	chr19:11193794-11194088	AluY	-	chr19:11203121-11203409	AluSg	-	LDLR	9325	16796766	chr19:11193982-11193990	chr19:11203307-11203315	GGGTTTCAC	9	+
188	chr19:11198249-11198555	AluY	-	chr19:11211436-11211737	AluY	-	LDLR	13186	20663204	chr19:11198360-11198401	chr19:11211546-11211587	CTCCTGCCTCAGCCTCCCGAGTAGCTGGGACTACAGGCACCC	42	+
189	chr19:11204805-11205120	AluSp	-	chr19:11217511-11217805	AluSx	-	LDLR	12685	22910581	chr19:11205052-11205072	chr19:11217737-11217757	CTCAGGTGATCCACCCGCCTC	21	+
190	chr19:11211967-11212110	FLAM_A	+	chr19:11229432-11229747	AluY	+	LDLR	17604	20663204	chr19:11211988-11212004	chr19:11229592-11229608	CTGTAGTCCCAGCTACT	17	+
191	chr19:11212620-11212918	AluY	+	chr19:11218617-11218918	AluSc8	+	LDLR	5994	17399720	chr19:11212821-11212827	chr19:11218815-11218821	TGAACCC	7	+
192	chr19:11216593-11216901	AluSx	-	chr19:11217811-11217942	AluSz6	-	LDLR	1042	16796766	chr19:11216854-11216881	chr19:11217896-11217923	GGCCTCCCAAAGTGCTGGGATTACAGGC	28	+
193	chr19:11216593-11216901	AluSx	-	chr19:11218974-11219262	AluSz	-	LDLR	2365	22910581	chr19:11216863-11216884	chr19:11219228-11219249	AAGTGCTGGGATTACAGGCGTG	22	+
194	chr19:11218974-11219262	AluSz	-	chr19:11222775-11223084	AluYa5	-	LDLR	3812	17399720	chr19:11219015-11219034	chr19:11222827-11222846	CAGGCTGGAGTGCAGTGGCA	20	+
195	chr19:11220365-11220676	AluSx1	-	chr19:11223382-11223663	AluSx1	-	LDLR	3012	16796766	chr19:11220462-11220469	chr19:11223474-11223481	CCAGGTTC	8	+
196	chr19:11223382-11223663	AluSx1	-	chr19:11233072-11233375	AluY	-	LDLR	9713	16796766	chr19:11223618-11223639	chr19:11233331-11233352	GCCTCCCAAAGTGCTGGGATTA	22	+
197	chr19:11223664-11223801	AluJb	-	chr19:11237603-11237914	AluSx1	-	LDLR	14110	20663204	chr19:11223753-11223784	chr19:11237863-11237894	CCTCAGCCTCCCAAAGTGCTGGGATTACAGGT	32	+
198	chr19:11236517-11236796	AluSq2	+	chr19:11243587-11243901	AluJo	+	LDLR|SPC24	7071	3818645	chr19:11236569-11236571	chr19:11243640-11243642	TGG	3	+
199	chr19:1201850-1202159	AluY	-	chr19:1212558-1212842	AluY	-	HMGB2P1|STK11	10703	20623358	chr19:1201875-1201900	chr19:1212578-1212603	TTTTTGAGACGGAGTCTCGCTCTGTC	26	+
200	chr19:1201850-1202159	AluY	-	chr19:1208306-1208606	AluY	-	HMGB2P1|STK11	6445	20623358	chr19:1201934-1201953	chr19:1208379-1208398	TCACTGCAAGCTCCGCCTCC	20	+
201	chr19:1203960-1204270	AluSq2	-	chr19:1219530-1219843	AluY	-	STK11	15573	20623358	chr19:1204145-1204160	chr19:1219718-1219733	GTATTTTTAGTAGAGA	16	+
202	chr19:1212558-1212842	AluY	-	chr19:1219530-1219843	AluY	-	STK11	7001	20435009	chr19:1212796-1212807	chr19:1219797-1219808	GCCTCCCAAAGT	12	+
203	chr19:1212851-1212978	AluJr	-	chr19:1219530-1219843	AluY	-	STK11	6865	21118512	chr19:1212932-1212957	chr19:1219797-1219822	GCCTCCCAAAGTGCTGGGATTACAGG	26	+
204	chr19:1212990-1213294	AluY	-	chr19:1219530-1219843	AluY	-	STK11	6549	20623358	chr19:1213145-1213151	chr19:1219694-1219700	GCCACCA	7	+
205	chr19:1212990-1213294	AluY	-	chr19:1219530-1219843	AluY	-	STK11	6548	20623358	chr19:1213239-1213247	chr19:1219787-1219795	GCCTGCCTC	9	+
206	chr19:49204395-49204735	AluSx1	-	chr19:49208356-49208665	AluSg	-	FUT2	3964	20880207	chr19:49204395-49204408	chr19:49208359-49208372	TTTTCTTTTCTTTT	14	+
207	chr19:55435346-55435635	AluSz6	-	chr19:55471953-55472261	AluY	-	NLRP7|NLRP2	36627	26956250	chr19:55435584-55435599	chr19:55472211-55472226	CCTCGGCCTCCCAAAG	16	+
208	chr19:55446782-55447082	AluSq2	+	chr19:55448045-55448296	AluSx	+	NLRP7	1219	26956250	chr19:55446847-55446883	chr19:55448066-55448102	TGAGGTCAGGAGTTCGAGACCAGCCTGGCCAACATGG	37	+
209	chr19:55448300-55448599	AluY	+	chr19:55453340-55453652	AluY	+	NLRP7	5041	26956250	chr19:55448309-55448351	chr19:55453350-55453392	GGTGGCTCACGCCTGTAATCCCAGCACTTTGGGAGGCCGAGGC	43	+
210	chr19:55448300-55448599	AluY	+	chr19:55462633-55462949	AluSz	+	NLRP7	14329	26956250	chr19:55448467-55448479	chr19:55462796-55462808	TCCCAGCTACTCG	13	+
211	chr19:55448300-55448599	AluY	+	chr19:55458411-55458707	AluSx	+	NLRP7	10107	26956250	chr19:55448480-55448502	chr19:55458587-55458609	GGAGGCTGAGGCAGGAGAATGGC	23	+
212	chr20:2373277-2373555	AluSx3	+	chr20:2376545-2376851	AluSp	+	TGM6	3269	S Gu and S Cheung, unpublished	chr20:2373292-2373303	chr20:2376561-2376572	TCACGCCTGTAA	12	+
213	chr20:25364175-25364309	AluSx	+	chr20:25378180-25378455	AluSx3	+	ABHD12	14005	26257172	chr20:25364254-25364282	chr20:25378259-25378287	AGACCAGCCTGGCCAATATGGTGAAACCC	29	+
214	chr20:6067953-6068249	AluSx1	-	chr20:6071872-6072176	AluSz	-	FERMT1	3919	16675959	chr20:6067983-6068012	chr20:6071902-6071931	AGTCTTGCTCTGTCACCCAGGCTGGAGTGC	30	+
215	chrX:100657471-100657760	AluSg	+	chrX:100660627-100660915	AluSz	+	RPL36A-HNRNPH2|GLA	3155	16595074	chrX:100657656-100657663	chrX:100660811-100660818	CAGGAGAA	8	+
216	chrX:102993641-102993881	AluSx1	+	chrX:103509968-103510250	AluSz	+	RNA5SP511|DPPA3P1|H2BFXP|PLP1|RAB9B|TMSB15B|H2BFWT|H2BFM|SLC25A53|ZCCHC18|FAM199X|ESX1	516369	12297985	chrX:102993718-102993735	chrX:103510087-103510104	AAAAATACAAAAATTAGC	18	+
217	chrX:133593367-133593677	AluSx1	-	chrX:133596512-133596647	AluJb	-	HPRT1	2969	11668636	chrX:133593635-133593669	chrX:133596604-133596638	TCCCAAAGTGCTGGGATTACAGGCATGAGCCACCG	35	+
218	chrX:18387480-18387792	AluSq	-	chrX:18544900-18545202	AluSp	-	CDKL5	157409	19471977	chrX:18387662-18387672	chrX:18545071-18545081	TTTTGTATTTT	11	+
219	chrX:18457678-18457973	AluSx	+	chrX:18532545-18532844	AluSq2	+	CDKL5	74870	19471977	chrX:18457838-18457852	chrX:18532708-18532722	TCCCAGCTACTCGGG	15	+

## Sheet: GRCh38_hg38
No	5' Alu Coordinate	5' Alu Family	5' Alu Strand	3' Alu Coordinate	3' Alu Family	3' Alu Strand	Gene	Deletion Size (bp)	PMID	5' Microhomology	3' Microhomology	Microhomology Sequence	Microhomology Size (bp)	Microhomology strand
1	chr1:161167542-161167862	AluSx4	-	chr1:161168659-161168963	AluSz	-	PPOX	1099	23324528	chr1:161167786-161167797	chr1:161168885-161168896	AACTCCTGACCT	12	+
2	chr1:161309555-161309691	FLAM_C	-	chr1:161329320-161329631	AluSz6	-	MPZ|SDHC	19940	26378787	chr1:161309644-161309666	chr1:161329584-161329606	GGCCTCCCAAAGTGCTGGGATTA	23	+
3	chr2:169498536-169498828	AluYc3	+	chr2:169508286-169508582	AluSg	+	BBS5	9761	27486776	chr2:169498679-169498684	chr2:169508440-169508445	CCTGTA	6	+
4	chr2:32049648-32049939	AluSx	-	chr2:32065971-32066269	AluSx3	-	SPAST	16335	25065914	chr2:32049838-32049846	chr2:32066173-32066181	CCATGTTGG	9	+
5	chr2:32057517-32057816	AluSz	-	chr2:32078006-32078232	AluYa5	-	SPAST	20475	25065914	chr2:32057698-32057703	chr2:32078173-32078178	GTAGAG	6	+
6	chr2:32057517-32057816	AluSz	-	chr2:32070069-32070367	AluSz	-	SPAST	12551	25065914	chr2:32057770-32057795	chr2:32070321-32070346	GCCTCCCAAAGTGCTGGGATTACAGG	26	+
7	chr2:32063025-32063197	AluSx3	-	chr2:32067058-32067361	AluSz	-	SPAST	4034	25065914	chr2:32063145-32063149	chr2:32067179-32067183	AGCCT	5	+
8	chr2:32066692-32067004	AluJo	+	chr2:32132108-32132415	AluJb	+	SPAST	65416	25065914	chr2:32066702-32066720	chr2:32132118-32132136	GGTGGCTCATGCCTGTAAT	19	+
9	chr2:32066692-32067004	AluJo	+	chr2:32139546-32139862	AluSx1	+	SPAST	72854	25065914	chr2:32066722-32066743	chr2:32139576-32139597	CCAGCACTTTGGGAGGCTGAGG	22	+
10	chr2:32076872-32077172	AluSg4	-	chr2:32125792-32126104	AluY	-	SPAST	48921	25065914	chr2:32077065-32077073	chr2:32125986-32125994	GGGGTTTCA	9	+
11	chr2:32082980-32083251	AluSx1	-	chr2:32116465-32116766	AluSz	-	SPAST	33495	25065914	chr2:32083068-32083105	chr2:32116563-32116600	TTCAAGTGATTCTCCTGCCTCAGCCTCCCAAGTAGCTG	38	+
12	chr2:32113136-32113384	AluSx	-	chr2:32114958-32115243	AluSp	-	SPAST	1863	25065914	chr2:32113351-32113370	chr2:32115214-32115233	CTGGGATTACAGGCGTGAGC	20	+
13	chr2:32122314-32122619	AluSz6	-	chr2:32167074-32167374	AluSp	-	SPAST|SLC30A6	44753	25065914	chr2:32122541-32122564	chr2:32167294-32167317	CGAACTCCTGACCTCAGGTGATCC	24	+
14	chr2:32125792-32126104	AluY	-	chr2:32135149-32135428	AluYm1	-	SPAST	9335	25065914	chr2:32125882-32125886	chr2:32135217-32135221	CCTCC	5	+
15	chr2:32127983-32128294	AluSz	-	chr2:32134700-32134995	AluSx	-	SPAST	6701	25065914	chr2:32128120-32128154	chr2:32134821-32134855	GAGTAGCTGGGATTACAGGCATGCGCCACCACGCC	35	+
16	chr2:32131667-32131958	AluSc	-	chr2:32147619-32147930	AluY	-	SPAST	15971	25065914	chr2:32131868-32131881	chr2:32147839-32147852	GCCAGGATGGTCTC	14	+
17	chr2:32135149-32135428	AluYm1	-	chr2:32156041-32156336	AluSp	-	SPAST	20909	25065914	chr2:32135234-32135266	chr2:32156143-32156175	ATTCTCCTGCCTCAGCCTCCCGAGTAGCTGGGA	33	+
18	chr2:32140394-32140634	AluSz6	+	chr2:32146585-32146880	AluSg	+	SPAST	6241	25065914	chr2:32140496-32140526	chr2:32146737-32146767	CACCTGTAATCCCAGCTACTCAGGAGGCTGA	31	+
19	chr2:32145094-32145396	AluJb	-	chr2:32176768-32177072	AluSz	-	SPAST|SLC30A6	31676	25065914	chr2:32145345-32145362	chr2:32177021-32177038	CCTTGGCCTCCCAAAGTG	18	+
20	chr2:32146585-32146880	AluSg	+	chr2:32148528-32148825	AluY	+	SPAST	1959	25065914	chr2:32146832-32146845	chr2:32148791-32148804	ACAGAGCAAGACTC	14	+
21	chr2:32147619-32147930	AluY	-	chr2:32173376-32173661	AluSx3	-	SPAST|SLC30A6	25742	25065914	chr2:32147736-32147756	chr2:32173478-32173498	ATTCTCCTGCCTCAGCCTCCC	21	+
22	chr2:32147619-32147930	AluY	-	chr2:32165212-32165503	AluSz	-	SPAST	17574	25065914	chr2:32147758-32147768	chr2:32165332-32165342	AGTAGCTGGGA	11	+
23	chr2:32148528-32148825	AluY	+	chr2:32159296-32159569	AluY	+	SPAST	10768	21659953	chr2:32148606-32148613	chr2:32159374-32159381	GAGACCAT	8	+
24	chr2:32150952-32151241	AluSp	-	chr2:32156041-32156336	AluSp	-	SPAST	5094	25065914	chr2:32151039-32151046	chr2:32156133-32156140	GGTTCAAG	8	+
25	chr2:32153319-32153615	AluSx1	-	chr2:32156041-32156336	AluSp	-	SPAST	2721	25065914	chr2:32153484-32153498	chr2:32156205-32156219	TTTTGTATTTTTAGT	15	+
26	chr2:32153319-32153615	AluSx1	-	chr2:32177945-32178246	AluY	-	SPAST|SLC30A6	24631	25065914	chr2:32153560-32153566	chr2:32178191-32178197	CCCGCCT	7	+
27	chr2:32153319-32153615	AluSx1	-	chr2:32171681-32171993	AluSp	-	SPAST|SLC30A6	18378	25065914	chr2:32153601-32153609	chr2:32171979-32171987	CCACCGTGC	9	+
28	chr2:32153795-32154018	AluSx	+	chr2:32159296-32159569	AluY	+	SPAST	5501	21659953	chr2:32153817-32153842	chr2:32159318-32159343	CTGTAATCCCAGCACTTTGGGAGGCC	26	+
29	chr2:47374630-47374934	AluSq	-	chr2:47390471-47390832	AluSz6	-	MIR559|EPCAM	15828	21309036	chr2:47374683-47374689	chr2:47390511-47390517	GCCCAGG	7	+
30	chr2:47375708-47376003	AluSx4	-	chr2:47387368-47387562	AluSx1	-	MIR559|EPCAM	11660	21309036	chr2:47375802-47375827	chr2:47387462-47387487	TTCAAGCGATTCTCCTGCCTCAGCCT	26	+
31	chr2:47376255-47376556	AluSp	-	chr2:47400092-47400375	AluSx1	-	MIR559|EPCAM	23820	21309036	chr2:47376516-47376539	chr2:47400336-47400359	TCCCAAAGTGCTGGGATTACAGGC	24	+
32	chr2:47377230-47377536	AluSz6	-	chr2:47387573-47387891	AluSz	-	MIR559|EPCAM	10355	21309036	chr2:47377467-47377478	chr2:47387822-47387833	CCTCAAGTGATC	12	+
33	chr2:47377951-47378252	AluY	+	chr2:47391079-47391372	AluSx	+	EPCAM	13128	21309036	chr2:47377963-47377977	chr2:47391091-47391105	TGGCTCACGCCTGTA	15	+
34	chr2:47377951-47378252	AluY	+	chr2:47400788-47401076	AluSc	+	EPCAM	22836	21309036	chr2:47377972-47378003	chr2:47400808-47400839	CCTGTAATCCCAGCACTTTGGGAGGCCGAGGC	32	+
35	chr2:47378289-47378601	AluSp	-	chr2:47387368-47387562	AluSx1	-	EPCAM	9064	23801599	chr2:47378398-47378420	chr2:47387462-47387484	TTCAAGCGATTCTCCTGCCTCAG	23	+
36	chr2:47381115-47381416	AluSp	+	chr2:47391079-47391372	AluSx	+	EPCAM	9963	21309036	chr2:47381172-47381179	chr2:47391135-47391142	GGATCACC	8	+
37	chr2:47381115-47381416	AluSp	+	chr2:47391079-47391372	AluSx	+	EPCAM	9963	21309036	chr2:47381195-47381212	chr2:47391158-47391175	GAGACCAGCCTGACCAAC	18	+
38	chr2:47382405-47382713	AluSp	+	chr2:47391079-47391372	AluSx	+	EPCAM	8674	21309036	chr2:47382433-47382446	chr2:47391107-47391120	TCCCAGCACTTTGG	14	+
39	chr2:47382405-47382713	AluSp	+	chr2:47397278-47397442	AluSp	+	EPCAM	14734	21309036	chr2:47382627-47382641	chr2:47397361-47397375	AGTGAGCCGAGATCA	15	+
40	chr2:47383328-47383601	AluSx4	-	chr2:47388542-47388798	AluSq2	-	EPCAM	5246	21309036	chr2:47383471-47383483	chr2:47388717-47388729	TTTTTGTATTTTT	13	+
41	chr2:47383328-47383601	AluSx4	-	chr2:47392263-47392481	AluSx	-	EPCAM	8879	21309036	chr2:47383551-47383560	chr2:47392430-47392439	CCTCGGCCTC	10	+
42	chr2:47383608-47383936	AluSx	-	chr2:47388542-47388798	AluSq2	-	EPCAM	4909	21309036	chr2:47383698-47383703	chr2:47388607-47388612	GATCTC	6	+
43	chr2:47384406-47384706	AluSx1	-	chr2:47390471-47390832	AluSz6	-	EPCAM	6058	21309036	chr2:47384453-47384469	chr2:47390511-47390527	GCCCAGGCTGGAGTGCA	17	+
44	chr2:47384406-47384706	AluSx1	-	chr2:47401242-47401550	AluSx1	-	EPCAM	16834	23801599	chr2:47384453-47384476	chr2:47401287-47401310	GCCCAGGCTGGAGTGCAATGGCGC	24	+
45	chr2:47384406-47384706	AluSx1	-	chr2:47387051-47387357	AluSx4	-	EPCAM	2648	21309036	chr2:47384478-47384495	chr2:47387126-47387143	ATCTCGGCTCACTGCAAC	18	+
46	chr2:47384406-47384706	AluSx1	-	chr2:47397446-47397583	AluSz	-	EPCAM	13004	21309036	chr2:47384507-47384520	chr2:47397511-47397524	GGGTTCAAGTGATT	14	+
47	chr2:47404706-47405007	AluSz	-	chr2:47441326-47441633	AluSz6	-	MSH2	36627	16541406	chr2:47404956-47404967	chr2:47441583-47441594	CCTTGGCCTCCC	12	+
48	chr2:47409385-47409661	AluSc5	-	chr2:47410767-47411063	AluSg7	-	MSH2	1403	16541406	chr2:47409614-47409627	chr2:47411017-47411030	GGCCTCCCAAAGTG	14	+
49	chr2:47409692-47409986	AluSg	+	chr2:47411871-47412172	AluSx	+	MSH2	2179	16541406	chr2:47409702-47409722	chr2:47411881-47411901	GGTGGCTCACACCTGTAATCC	21	+
50	chr2:47410767-47411063	AluSg7	-	chr2:47426144-47426316	AluYh3	-	MSH2	15381	16541406	chr2:47410877-47410910	chr2:47426258-47426291	CTGCCTCAGCCTCCTGAGTAGCTGGGATTACAGG	34	+
51	chr2:47414608-47414876	AluSx1	-	chr2:47424220-47424529	AluSx	-	MSH2	9655	23484096	chr2:47414763-47414773	chr2:47424418-47424428	GACAGGGTTTC	11	+
52	chr2:47429323-47429623	AluSp	-	chr2:47435988-47436284	AluSz6	-	MSH2	6665	16541406	chr2:47429514-47429521	chr2:47436179-47436186	GGGGTTTC	8	+
53	chr3:10031222-10031521	AluY	+	chr3:10191013-10191307	AluYm1	+	FANCD2|FANCD2OS|BRK1|VHL|IRAK2|RNU6-670P|CYCSP11	159793	19280651	chr3:10031452-10031480	chr3:10191245-10191273	AGATCGCGCCACTGCACTCCAGCCTGGGC	29	+
54	chr3:10067515-10067816	AluSx1	+	chr3:10257349-10257598	AluSx	+	FANCD2|FANCD2OS|BRK1|VHL|IRAK2|TATDN2|RNU6-814P	189833	19280651	chr3:10067597-10067617	chr3:10257430-10257450	AGACCAGCCTGGCCAACATGG	21	+
55	chr3:10078349-10078653	AluY	-	chr3:10182275-10182580	AluY	-	FANCD2|FANCD2OS|BRK1|VHL|IRAK2	103928	19280651	chr3:10078487-10078502	chr3:10182415-10182430	TGGGACTACAGGTGCC	16	+
56	chr3:10120032-10120196	AluSx4	-	chr3:10171770-10171955	AluSg	-	BRK1|VHL|IRAK2	51736	19280651	chr3:10120133-10120137	chr3:10171869-10171873	GATTC	5	+
57	chr3:10127306-10127605	AluYm1	+	chr3:10197918-10198200	AluY	+	VHL|IRAK2	70613	19280651	chr3:10127404-10127412	chr3:10198017-10198025	GTGAAACCC	9	+
58	chr3:10130817-10131114	AluSz	+	chr3:10144957-10145209	AluSx	+	VHL	14086	19280651	chr3:10131027-10131032	chr3:10145113-10145118	GAACCT	6	+
59	chr3:10133961-10134243	AluSq2	+	chr3:10191013-10191307	AluYm1	+	VHL|IRAK2	57053	19280651	chr3:10133980-10133996	chr3:10191033-10191049	GCCTGTAATCCCAGCAC	17	+
60	chr3:10137017-10137317	AluY	+	chr3:10145424-10145735	AluY	+	VHL	8407	19280651	chr3:10137095-10137111	chr3:10145502-10145518	GAGACCATCCTGGCTAA	17	+
61	chr3:10138113-10138411	AluY	-	chr3:10142339-10142643	AluSg	-	VHL	4237	19280651	chr3:10138130-10138161	chr3:10142367-10142398	ACGGAGTCTCGCTCTGTCGCCCAGGCTGGAGT	32	+
62	chr3:10138113-10138411	AluY	-	chr3:10167415-10167714	AluY	-	VHL|IRAK2	29303	19280651	chr3:10138371-10138400	chr3:10167674-10167703	CAAAGTGCTGGGATTACAGGCGTGAGCCAC	30	+
63	chr3:10138530-10138833	AluJb	-	chr3:10158138-10158449	AluY	-	VHL	19616	19280651	chr3:10138686-10138705	chr3:10158302-10158321	CCACGCCCGGCTAATTTTTT	20	+
64	chr3:10142339-10142643	AluSg	-	chr3:10148311-10148613	AluYa5	-	VHL	5969	19280651	chr3:10142363-10142407	chr3:10148332-10148376	TGAGACGGAGTCTCGCTCTGTCGCCCAGGCTGGAGTGCAGTGGCG	45	+
65	chr3:10142339-10142643	AluSg	-	chr3:10147360-10147664	AluSx1	-	VHL	5021	19280651	chr3:10142597-10142614	chr3:10147618-10147635	GCCTCCCAAAGTGCTGGG	18	+
66	chr3:10142339-10142643	AluSg	-	chr3:10160042-10160352	AluSz	-	VHL	17709	19280651	chr3:10142599-10142614	chr3:10160308-10160323	CTCCCAAAGTGCTGGG	16	+
67	chr3:10143118-10143428	AluSx	-	chr3:10149101-10149412	AluJo	-	VHL	5984	19280651	chr3:10143379-10143394	chr3:10149363-10149378	TTGGCCTCCCAAAGTG	16	+
68	chr3:10145424-10145735	AluY	+	chr3:10152861-10152995	AluSq2	+	VHL	7437	19280651	chr3:10145470-10145471	chr3:10152907-10152908	CC	2	+
69	chr3:10145424-10145735	AluY	+	chr3:10175609-10175918	AluY	+	VHL|IRAK2	30184	19280651	chr3:10145564-10145573	chr3:10175748-10175757	GGCGTGGTGG	10	+
70	chr3:10146174-10146473	AluY	-	chr3:10148311-10148613	AluYa5	-	VHL	2141	19280651	chr3:10146192-10146203	chr3:10148333-10148344	GAGACGGAGTCT	12	+
71	chr3:10146174-10146473	AluY	-	chr3:10148311-10148613	AluYa5	-	VHL	2141	19280651	chr3:10146251-10146259	chr3:10148392-10148400	GCAAGCTCC	9	+
72	chr3:10146174-10146473	AluY	-	chr3:10148311-10148613	AluYa5	-	VHL	2141	19280651	chr3:10146300-10146320	chr3:10148441-10148461	AGTAGCTGGGACTACAGGCGC	21	+
73	chr3:10146174-10146473	AluY	-	chr3:10147014-10147309	AluSc8	-	VHL	836	19280651	chr3:10146367-10146375	chr3:10147203-10147211	GGTTTCACC	9	+
74	chr3:10147014-10147309	AluSc8	-	chr3:10150883-10151180	AluSx1	-	VHL	3882	19280651	chr3:10147055-10147074	chr3:10150937-10150956	AGGCTGGAGTGCAGTGGCGC	20	+
75	chr3:10147014-10147309	AluSc8	-	chr3:10150883-10151180	AluSx1	-	VHL	3882	19280651	chr3:10147077-10147096	chr3:10150959-10150978	TCTCGGCTCACTGCAACCTC	20	+
76	chr3:10148311-10148613	AluYa5	-	chr3:10165722-10166028	AluY	-	VHL|IRAK2	17414	19280651	chr3:10148526-10148534	chr3:10165940-10165948	GGATGGTCT	9	+
77	chr3:10149101-10149412	AluJo	-	chr3:10157603-10157904	AluSz	-	VHL	8493	19280651	chr3:10149304-10149310	chr3:10157797-10157803	GGGTTTC	7	+
78	chr3:136288654-136288790	AluJo	-	chr3:138953019-138953313	AluSz	-	FOXL2|C3orf72|PCCB|STAG1|RNU6-1284P|RNY4P4|HMGN1P10|RNU7-198P|RNU6-789P|IL20RB-AS1|RNA5SP142|NPM1P17|HSPA8P9|KRT8P36|GAPDHP39|RPL23AP40|SLC35G2|NCK1|EEF1A1P25|ATP5G1P3|IL20RB|SOX14|CLDN18|DZIP1L|A4GNT|DBR1|ARMC8|NME9|MRAS|ESYT3|CEP70|FAIM|PIK3CB	2664380	23516377	chr3:136288666-136288699	chr3:138953046-138953079	GTCTCACTCTGTTGCCCAGGCTGGAGTGCAGTGG	34	+
79	chr3:138175502-138175803	AluSx3	+	chr3:140016519-140016822	AluSc	+	FOXL2|C3orf72|PRR23A|MRPS22|PRR23B|PRR23C|COPB2|RBP2|RBP1|NMNAT3|CLSTN2|GAPDHP39|RPL23AP40|EEF1A1P25|ATP5G1P3|RPL7L1P7|BPESC1|RNU6-736P|ACTG1P1|RN7SKP124|RN7SL724P|TRMT112P5|ARMC8|NME9|MRAS|ESYT3|CEP70|FAIM|PIK3CB	1841023	23516377	chr3:138175544-138175554	chr3:140016567-140016577	GAGGCGGGCGG	11	+
80	chr3:138215843-138216155	AluSx3	-	chr3:142381564-142381865	AluSz6	-	FOXL2|C3orf72|PRR23A|MRPS22|PRR23B|PRR23C|COPB2|RBP2|RBP1|NMNAT3|CLSTN2|TRIM42|SLC25A36|SPSB4|ACPL2|ZBTB38|GAPDHP39|RPL23AP40|RASA2|EEF1A1P25|ATP5G1P3|RPL7L1P7|BPESC1|RNU6-736P|ACTG1P1|RNF7|GRK7|ATP1B3|TFDP2|RN7SKP124|RN7SL724P|TRMT112P5|CLSTN2-AS1|KRT18P35|RASA2-IT1|YWHAQP6|TPT1P3|HMGN2P25|RNU6-509P|ATP1B3-AS1|RNU6-425P|ARMC8|NME9|GK5|MRAS|XRN1|ESYT3|CEP70|FAIM|PIK3CB	4165518	23516377	chr3:138216046-138216070	chr3:142381564-142381588	TTTTTTTTTTTTTTTTTTTTTTAAG	25	+
81	chr3:138813431-138813716	AluY	-	chr3:141034514-141034804	AluYj4	-	FOXL2|C3orf72|PRR23A|MRPS22|PRR23B|PRR23C|COPB2|RBP2|RBP1|NMNAT3|CLSTN2|TRIM42|SLC25A36|EEF1A1P25|ATP5G1P3|RPL7L1P7|BPESC1|RNU6-736P|ACTG1P1|RN7SKP124|RN7SL724P|TRMT112P5|CLSTN2-AS1|PIK3CB	2221106	23516377	chr3:138813547-138813561	chr3:141034653-141034667	AGCTGGGACTACAGG	15	+
82	chr3:138883860-138884147	AluSp	-	chr3:142738983-142739273	AluSp	-	FOXL2|C3orf72|PRR23A|MRPS22|PRR23B|PRR23C|COPB2|RBP2|RBP1|NMNAT3|CLSTN2|TRIM42|SLC25A36|SPSB4|ACPL2|ZBTB38|RASA2|ATP5G1P3|RPL7L1P7|BPESC1|RNU6-736P|ACTG1P1|RNF7|GRK7|ATP1B3|TFDP2|RN7SKP124|RN7SL724P|TRMT112P5|CLSTN2-AS1|KRT18P35|RASA2-IT1|YWHAQP6|TPT1P3|HMGN2P25|RNU6-509P|ATP1B3-AS1|RNU6-425P|RNU6-1294P|RNU1-100P|RPL6P9|RNA5SP143|PLS1-AS1|RN7SKP25|GK5|XRN1|ATR|PLS1|TRPC1	3855121	23516377	chr3:138884015-138884040	chr3:142739136-142739161	GGCTAATTTTGTATTTTTAGTAGAGA	26	+
83	chr3:139022424-139022711	AluSz	-	chr3:142043352-142043540	AluSx	-	MRPS22|PRR23C|COPB2|RBP2|RBP1|NMNAT3|CLSTN2|TRIM42|SLC25A36|SPSB4|ACPL2|ZBTB38|RASA2|RPL7L1P7|BPESC1|RNU6-736P|ACTG1P1|RNF7|GRK7|ATP1B3|TFDP2|RN7SKP124|RN7SL724P|TRMT112P5|CLSTN2-AS1|KRT18P35|RASA2-IT1|YWHAQP6|TPT1P3|HMGN2P25|RNU6-509P|ATP1B3-AS1	3020948	23516377	chr3:139022440-139022451	chr3:142043388-142043399	GAGTCTCACTCT	12	+
84	chr3:37008147-37008441	AluSx	-	chr3:37010543-37010850	AluSx	-	MLH1	2409	18792805	chr3:37008349-37008381	chr3:37010758-37010790	CCAGGCTGGTCTCGAACTCCTGACCTCAGGTGA	33	+
85	chr3:98582484-98582790	AluY	-	chr3:98585864-98586170	AluY	-	CPOX	3381	21231929	chr3:98582760-98582781	chr3:98586141-98586162	GGATTACAGGCGTGAGCCACCA	22	+
86	chr3:9950513-9950802	AluSx	-	chr3:10199885-10200187	AluSx	-	PRRT3|EMC3|FANCD2|FANCD2OS|BRK1|VHL|IRAK2|PRRT3-AS1|EMC3-AS1|CYCSP10|CIDECP|RNU6-670P|CYCSP11	249385	19280651	chr3:9950597-9950627	chr3:10199982-10200012	GGTTCAAGTGATTCTCCTGCCTCAGCCTCCC	31	+
87	chr6:10539181-10539488	AluSp	-	chr6:10632265-10632489	AluSx1	-	GCNT2	93001	21761136	chr6:10539357-10539385	chr6:10632358-10632386	TTTTGTATTTTTAGTAGAGACGGGGTTTC	29	+
88	chr6:26042788-26043099	AluY	-	chr6:26098885-26099185	AluSz	-	HIST1H2BB|HIST1H3C|HIST1H1C|HFE	56083	25284364	chr6:26042837-26042850	chr6:26098920-26098933	TCACCCAGGCTGGA	14	+
89	chr6:26067088-26067355	AluSc	-	chr6:26099813-26100109	AluSg	-	HFE	32745	18809761	chr6:26067218-26067234	chr6:26099963-26099979	CCACCACGCCCAGCTAA	17	+
90	chr8:117833335-117833634	AluSg	+	chr8:117981576-117981870	AluSz6	+	EXT1	148255	21703028	chr8:117833399-117833434	chr8:117981654-117981689	GAGGTCAGGAGTTCAAGACCAGCCTGGCCAACATGG	36	+
91	chr9:27040269-27040570	AluSz	+	chr9:27060677-27060991	AluY	+	IFT74	20417	27486776	chr9:27040541-27040565	chr9:27060958-27060982	TCTCAAAAAAAAAAAAAAAAAAAAA	25	+
92	chr9:34280003-34280313	AluYa5	+	chr9:34296245-34296550	AluY	+	KIF24|RNU2-50P	16242	26378787	chr9:34280038-34280055	chr9:34296280-34296297	ACTTTGGGAGGCCGAGGC	18	+
93	chr10:12917181-12917495	AluYk4	-	chr10:13098711-13099014	AluSx4	-	RNA5SP300|RPL5P25|CCDC3	181519	26740941	chr10:12917448-12917484	chr10:13098967-13099003	GGCCTCCCAAAGTGCTGGGATTACAGGCGTGAGCCAC	37	+
94	chr10:13108545-13108845	AluY	-	chr10:13111845-13112147	AluY	-	OPTN	3301	22402017	chr10:13108709-13108714	chr10:13112010-13112015	GCTAAT	6	+
95	chr10:13109544-13109860	AluJb	+	chr10:13111416-13111706	AluSx	+	OPTN	1872	22402017	chr10:13109625-13109636	chr10:13111497-13111508	AGACCAGCCTGG	12	+
96	chr11:108132573-108132881	AluY	+	chr11:108134363-108134663	AluSc	+	ACAT1	1790	23920042	chr11:108132594-108132628	chr11:108134384-108134418	CCTGTAATCCCAGCACTTTGGGAGGCCGAGGCAGG	35	+
97	chr11:112077839-112078143	AluSg	-	chr11:112088191-112088513	AluSx1	-	C11orf57|TIMM8B|SDHD	10353	19546167	chr11:112078073-112078079	chr11:112088426-112088432	TGACCTC	7	+
98	chr11:44164877-44165177	AluYa5	-	chr11:44173543-44173866	AluY	-	EXT2	8689	21703028	chr11:44165125-44165156	chr11:44173814-44173845	GCCTCGGCCTCCCAAAGTGCTGGGATTACAGG	32	+
99	chr11:47331058-47331357	AluSx	-	chr11:47334566-47334862	AluSz	-	MYBPC3	3505	22820391	chr11:47331258-47331276	chr11:47334763-47334781	ATGTTGGCCAGGCTGGTCT	19	+
100	chr11:57600674-57600965	AluSx	+	chr11:57603868-57604154	AluSz	+	SERPING1	3181	1656734	chr11:57600937-57600963	chr11:57604118-57604144	CGAGACTCTGTCTCAAAAAAAAAAAAA	27	+
101	chr11:57600674-57600965	AluSx	+	chr11:57603262-57603556	AluSx3	+	SERPING1	2596	1656734	chr11:57600939-57600960	chr11:57603535-57603556	AGACTCTGTCTCAAAAAAAAAA	22	+
102	chr11:66507186-66507488	AluY	+	chr11:66524919-66525214	AluY	+	DPP3|BBS1|ZDHHC24	17733	24746959	chr11:66507417-66507420	chr11:66525150-66525153	AGAT	4	+
103	chr11:66528687-66528998	AluSq2	+	chr11:66536590-66536904	AluSp	+	BBS1|ZDHHC24	7906	27486776	chr11:66528885-66528899	chr11:66536791-66536805	TTGAACCCGGGAGGC	15	+
104	chr11:68047004-68047319	AluSx1	-	chr11:68048285-68048593	AluSx1	-	TCIRG1	1283	18715141	chr11:68047247-68047251	chr11:68048530-68048534	GTGAT	5	+
105	chr12:101752971-101753277	AluSq2	+	chr12:101753868-101754095	AluSx	+	GNPTAB	897	23430906	chr12:101753029-101753049	chr12:101753926-101753946	GATCACCTGAGGTCAGGAGTT	21	+
106	chr12:102890801-102891096	AluSx	+	chr12:102895565-102895870	AluSx	+	PAH	4764	16931086	chr12:102890810-102890820	chr12:102895574-102895584	CTGTGGCTCAC	11	+
107	chr12:42476206-42476480	AluSp	-	chr12:42505426-42505735	AluSx	-	PRICKLE1	29254	26378787	chr12:42476385-42476400	chr12:42505639-42505654	TTGGTCAGGCTGGTCT	16	+
108	chr15:44563994-44564292	AluSx1	-	chr15:44566707-44567002	AluSx	-	SPG11	2710	22237444	chr15:44564262-44564283	chr15:44566972-44566993	GGATTACAGGCATGAGCCACTG	22	+
109	chr15:44569716-44570006	AluSx	-	chr15:44578015-44578330	AluY	-	SPG11	8323	22237444	chr15:44569956-44569997	chr15:44578279-44578320	CCTCGGCCTCCCAAAGTGCTGGGATTACAGGCGTGAGCCACC	42	+
110	chr15:44571488-44571796	AluYm1	-	chr15:44572978-44573284	AluSc8	-	SPG11	1489	22237444	chr15:44571497-44571524	chr15:44572986-44573013	TTTTTTTTTTTTTTTTTTTGAGATGGAG	28	+
111	chr15:44585308-44585623	AluY	+	chr15:44586364-44586659	AluSz	+	SPG11	1056	22237444	chr15:44585319-44585343	chr15:44586375-44586399	GTGGCTCACGCCTGTAATCCCAGCA	25	+
112	chr15:44585308-44585623	AluY	+	chr15:44586364-44586659	AluSz	+	SPG11	1042	27071356	chr15:44585476-44585481	chr15:44586518-44586523	CCTGTA	6	+
113	chr15:72707971-72708265	AluSc8	-	chr15:72714221-72714525	AluSx	-	BBS4	6260	27486776	chr15:72708224-72708245	chr15:72714484-72714505	CCAAAGTGCTGGGATTACAGGC	22	+
114	chr15:72714221-72714525	AluSx	-	chr15:72719747-72720040	AluSg	-	BBS4	5524	27486776	chr15:72714242-72714255	chr15:72719766-72719779	TTGAGACAGAGTCT	14	+
115	chr16:84317013-84317293	AluSz6	+	chr16:87813911-87814196	AluY	+	COX6CP16|LINC00311|MIR5093|RN7SL381P|MIR1910|RNU1-103P|LINC01082|LINC01081|LINC00917|FENDRR|WFDC1|ATP2C2|TLDC1|COTL1|KLHL36|USP10|CRISPLD2|ZDHHC7|KIAA0513|FAM92B|GSE1|GINS2|C16orf74|EMC8|COX4I1|IRF8|FOXF1|MTHFSD|FOXC2|FOXL1|C16orf95|FBXO31|MAP1LC3B|ZCCHC14|JPH3|KLHDC4	3496878	19500772	chr16:84317092-84317103	chr16:87813970-87813981	AGACCAGCCTGG	12	+
116	chr16:84730977-84731278	AluSc8	-	chr16:86204942-86205254	AluY	-	COX6CP16|LINC00311|MIR5093|RN7SL381P|MIR1910|RNU1-103P|LINC01082|USP10|CRISPLD2|ZDHHC7|KIAA0513|FAM92B|GSE1|GINS2|C16orf74|EMC8|COX4I1|IRF8	1473974	24842713	chr16:84731022-84731040	chr16:86204996-86205014	CAGGCTGGAGTGCAGTGGC	19	+
117	chr16:84841603-84841893	AluSx1	-	chr16:86352968-86353273	AluSx1	-	COX6CP16|LINC00311|MIR5093|RN7SL381P|MIR1910|RNU1-103P|LINC01082|LINC01081|LINC00917|CRISPLD2|ZDHHC7|KIAA0513|FAM92B|GSE1|GINS2|C16orf74|EMC8|COX4I1|IRF8	1511379	27071622	chr16:84841877-84841883	chr16:86353256-86353262	GAGCCAC	7	+
118	chr16:85114516-85114827	AluSq2	-	chr16:86612767-86612946	AluSq	-	COX6CP16|LINC00311|MIR5093|RN7SL381P|MIR1910|RNU1-103P|LINC01082|LINC01081|LINC00917|FENDRR|GSE1|GINS2|C16orf74|EMC8|COX4I1|IRF8|FOXF1|MTHFSD|FOXC2|FOXL1	1498240	19500772	chr16:85114658-85114674	chr16:86612898-86612914	CTGGGATTACAGGTGCC	17	+
119	chr16:85356660-85356791	FLAM_C	-	chr16:87930736-87931038	AluSc5	-	RN7SL381P|MIR1910|RNU1-103P|LINC01082|LINC01081|LINC00917|FENDRR|GSE1|GINS2|C16orf74|EMC8|COX4I1|IRF8|FOXF1|MTHFSD|FOXC2|FOXL1|C16orf95|FBXO31|MAP1LC3B|ZCCHC14|JPH3|KLHDC4|SLC7A5|CA5A	2574247	23505205	chr16:85356745-85356766	chr16:87930992-87931013	GCCTCCCAAAGTGCTGGGATTA	22	+
120	chr16:85783018-85783314	AluSx	+	chr16:86685821-86686147	AluSx1	+	LINC01082|LINC01081|LINC00917|FENDRR|EMC8|COX4I1|IRF8|FOXF1|MTHFSD|FOXC2|FOXL1	902800	19500772	chr16:85783101-85783118	chr16:86685901-86685918	GAGACCAGCCTGGCCAAC	18	+
121	chr16:85811181-85811481	AluSx	-	chr16:86844329-86844623	AluSg7	-	LINC01082|LINC01081|LINC00917|FENDRR|IRF8|FOXF1|MTHFSD|FOXC2|FOXL1	1033142	19500772	chr16:85811464-85811471	chr16:86844606-86844613	TGAGCCAC	8	+
122	chr16:85976220-85976522	AluY	+	chr16:87813911-87814196	AluY	+	LINC01082|LINC01081|LINC00917|FENDRR|FOXF1|MTHFSD|FOXC2|FOXL1|C16orf95|FBXO31|MAP1LC3B|ZCCHC14|JPH3|KLHDC4	1837670	27071622	chr16:85976434-85976454	chr16:87814104-87814124	GAGCTTGCAGTGAGCCGAGAT	21	+
123	chr16:85993362-85993666	AluSx1	-	chr16:87165081-87165399	AluJb	-	LINC01082|LINC01081|LINC00917|FENDRR|FOXF1|MTHFSD|FOXC2|FOXL1|C16orf95	1171712	26703872	chr16:85993409-85993427	chr16:87165121-87165139	CCCAGGCTGGAGTGCAGTG	19	+
124	chr16:86021446-86021750	AluSp	-	chr16:86254509-86254732	AluSx1	-	LINC01082|LINC01081	233068	27071622	chr16:86021553-86021593	chr16:86254621-86254661	TTCTCCTGCCTCAGCCTCCCGAGTAGCTGGGATTACAGGCA	41	+
125	chr16:86056765-86057059	AluSx1	-	chr16:87886893-87887202	AluSx	-	LINC01082|LINC01081|LINC00917|FENDRR|FOXF1|MTHFSD|FOXC2|FOXL1|C16orf95|FBXO31|MAP1LC3B|ZCCHC14|JPH3|KLHDC4|SLC7A5	1830139	19500772	chr16:86057010-86057052	chr16:87887149-87887191	CGCCTCGGCCTCCCAAAGTGCTGGGATTACAGGCATGAGCCAC	43	+
126	chr16:86084504-86084797	AluJb	-	chr16:86253409-86253720	AluSx	-	LINC01082|LINC01081	168924	23034409	chr16:86084524-86084535	chr16:86253448-86253459	TCTCACTCTGTC	12	+
127	chr16:86113829-86114121	AluSz	-	chr16:86253409-86253720	AluSx	-	LINC01082|LINC01081	139594	23034409	chr16:86113920-86113960	chr16:86253514-86253554	GGGTTCAAGCGATTCTCCTGCCTCAGCCTCCCAAGTAGCTG	41	+
128	chr16:86149087-86149398	AluY	+	chr16:87617881-87618190	AluJb	+	LINC01082|LINC01081|LINC00917|FENDRR|FOXF1|MTHFSD|FOXC2|FOXL1|C16orf95|FBXO31|MAP1LC3B|ZCCHC14|JPH3	1468794	27071622	chr16:86149097-86149131	chr16:87617891-87617925	GGTGGCTCATGCCTGTAATCCCAGCACTTTGGGAG	35	+
129	chr16:86178272-86178572	AluSc	+	chr16:86414360-86414653	AluSq2	+	LINC01082|LINC01081|LINC00917	236092	23034409	chr16:86178434-86178461	chr16:86414526-86414553	CCAGCTACTTGGGAGGCTGAGGCAGGAG	28	+
130	chr16:86459875-86460149	AluY	+	chr16:86562737-86563024	AluY	+	FENDRR|FOXF1|MTHFSD	102864	19500772	chr16:86459925-86459943	chr16:86562789-86562807	AGACCATCCTGGCTAACAC	19	+
131	chr16:89578478-89578781	AluSz	+	chr16:89743542-89743848	AluSp	+	VPS9D1-AS1|CPNE7|DPEP1|CHMP1A|SPATA33|CDK10|SPATA2L|VPS9D1|ZNF276|FANCA	165063	25168418	chr16:89578618-89578628	chr16:89743681-89743691	GGCATGGTGGC	11	+
132	chr16:89656147-89656436	AluY	-	chr16:89831388-89831696	AluY	-	VPS9D1-AS1|CHMP1A|SPATA33|CDK10|SPATA2L|VPS9D1|ZNF276|FANCA|SPIRE2	175261	25168418	chr16:89656162-89656190	chr16:89831423-89831451	AGTCTCGCTCTGTCGCCCAGGCTGGAGTG	29	+
133	chr16:89663238-89663544	AluSp	-	chr16:89815038-89815335	AluSx1	-	VPS9D1-AS1|SPATA33|CDK10|SPATA2L|VPS9D1|ZNF276|FANCA	151792	25168418	chr16:89663510-89663535	chr16:89815302-89815327	GCTAGGATTACAGGCGTGAGCCACCA	26	+
134	chr16:89728207-89728392	AluSx1	-	chr16:89911794-89912090	AluY	-	ZNF276|FANCA|SPIRE2|TCF25	183569	25168418	chr16:89728337-89728360	chr16:89911906-89911929	GCCTCAGCCTCCCGAGTAGCTGGG	24	+
135	chr16:89737240-89737541	AluSx4	+	chr16:89759039-89759349	AluY	+	ZNF276|FANCA	21799	25168418	chr16:89737263-89737284	chr16:89759062-89759083	TGTAATCCCAGCACTTTGGGAG	22	+
136	chr16:89742529-89742659	AluY	+	chr16:89820157-89820451	AluSx1	+	FANCA|SPIRE2	77629	25168418	chr16:89742539-89742574	chr16:89820168-89820203	GTGGCTCACGCCTGTAATCCCAGCACTTTGGGAGGC	36	+
137	chr16:89747432-89747703	AluSg	+	chr16:89781393-89781705	AluY	+	FANCA	33973	25168418	chr16:89747454-89747474	chr16:89781427-89781447	ACTTTGGGAGGCCAAGGCGGG	21	+
138	chr16:89750081-89750159	AluJo	+	chr16:89753773-89754072	AluSq	+	FANCA	3692	25168418	chr16:89750111-89750141	chr16:89753803-89753833	CCAGCACTTTGGGAGGCCGAGGCAGGCAGAT	31	+
139	chr16:89750201-89750505	AluY	+	chr16:89761138-89761448	AluY	+	FANCA	10938	25168418	chr16:89750278-89750284	chr16:89761216-89761222	GAGACCA	7	+
140	chr16:89750508-89750769	AluSx1	+	chr16:89810042-89810340	AluY	+	FANCA	59550	25168418	chr16:89750711-89750727	chr16:89810261-89810277	TGCAGTGAGCCAAGATC	17	+
141	chr16:89751222-89751485	AluJb	+	chr16:89795348-89795657	AluSx3	+	FANCA	44128	25168418	chr16:89751241-89751249	chr16:89795369-89795377	CTGTAATCC	9	+
142	chr16:89751769-89752068	AluY	-	chr16:89866600-89866908	AluYm1	-	FANCA|SPIRE2	114838	25168418	chr16:89751812-89751856	chr16:89866650-89866694	CCAGGCTGGAGTGCAGTGGCACAATCTCGGCTCACTGCAAGCTCC	45	+
143	chr16:89754073-89754250	AluSx1	+	chr16:89839060-89839389	AluY	+	FANCA|SPIRE2	85150	25168418	chr16:89754224-89754234	chr16:89839374-89839384	AAAAAAAAAAA	11	+
144	chr16:89762821-89762952	AluY	+	chr16:89774449-89774754	AluY	+	FANCA	11628	25168418	chr16:89762911-89762931	chr16:89774539-89774559	GCTAACACGGTGAAACCCTGT	21	+
145	chr16:89762966-89763279	AluSc8	+	chr16:89776546-89776860	AluY	+	FANCA	13580	25168418	chr16:89763030-89763073	chr16:89776610-89776653	GAGGTCAGGAGATTGAGACCATCCTGGCTAACACAGTGAAACCC	44	+
146	chr16:89763657-89763950	AluSg	+	chr16:89782094-89782230	AluY	+	FANCA	18444	25168418	chr16:89763779-89763782	chr16:89782223-89782226	AAAA	4	+
147	chr16:89763657-89763950	AluSg	+	chr16:89771177-89771481	AluJb	+	FANCA	7526	25168418	chr16:89763805-89763824	chr16:89771331-89771350	CGCCTGTAGTCCCAGCTACT	20	+
148	chr16:89763963-89764257	AluSx1	+	chr16:89782231-89782525	AluY	+	FANCA	18270	25168418	chr16:89764002-89764013	chr16:89782272-89782283	GAGGCCAAGGCG	12	+
149	chr16:89772536-89772841	AluSx1	+	chr16:89800749-89801062	AluSx1	+	FANCA	28214	25168418	chr16:89772734-89772743	chr16:89800948-89800957	GCTTGAACCC	10	+
150	chr16:89774449-89774754	AluY	+	chr16:89810042-89810340	AluY	+	FANCA	35592	25168418	chr16:89774536-89774556	chr16:89810128-89810148	CTGGCTAACACGGTGAAACCC	21	+
151	chr16:89774449-89774754	AluY	+	chr16:89799745-89800011	AluYk4	+	FANCA	25263	25168418	chr16:89774558-89774571	chr16:89799821-89799834	GTCTCTACTAAAAA	14	+
152	chr16:89774449-89774754	AluY	+	chr16:89790120-89790397	AluSz	+	FANCA	15664	25168418	chr16:89774602-89774609	chr16:89790266-89790273	CGCCTGTA	8	+
153	chr16:89774449-89774754	AluY	+	chr16:89781393-89781705	AluY	+	FANCA	6946	25168418	chr16:89774655-89774668	chr16:89781601-89781614	GGGAGGCGGAGCTT	14	+
154	chr16:89781393-89781705	AluY	+	chr16:89783270-89783576	AluY	+	FANCA	1877	25168418	chr16:89781413-89781425	chr16:89783290-89783302	CCTGTAATCCCAG	13	+
155	chr16:89781393-89781705	AluY	+	chr16:89795003-89795283	AluSx	+	FANCA	13609	25168418	chr16:89781571-89781592	chr16:89795180-89795201	GAGGCTGAGGCAGGAGAATGGT	22	+
156	chr16:89782094-89782230	AluY	+	chr16:89783270-89783576	AluY	+	FANCA	1175	25168418	chr16:89782119-89782140	chr16:89783294-89783315	TAATCCCAGCACTTTGGGAGGC	22	+
157	chr16:89782094-89782230	AluY	+	chr16:89783270-89783576	AluY	+	FANCA	1175	25168418	chr16:89782203-89782216	chr16:89783378-89783391	GTCTCTACTAAAAA	14	+
158	chr16:89782231-89782525	AluY	+	chr16:89788181-89788461	AluSc	+	FANCA	5949	25168418	chr16:89782362-89782371	chr16:89788311-89788320	ATTAGCCAGG	10	+
159	chr16:89790449-89790766	AluSg	+	chr16:89800749-89801062	AluSx1	+	FANCA	10304	25168418	chr16:89790628-89790650	chr16:89800932-89800954	CTGAGGCAGGAGAATAGCTTGAA	23	+
160	chr16:89799745-89800011	AluYk4	+	chr16:89807604-89807908	AluYh3	+	FANCA	7890	25168418	chr16:89799857-89799868	chr16:89807747-89807758	GTGGCGGACGCC	12	+
161	chr16:89800749-89801062	AluSx1	+	chr16:89810042-89810340	AluY	+	FANCA	9290	25168418	chr16:89800911-89800930	chr16:89810201-89810220	TAGTCCCAGCTACTCGGGAG	20	+
162	chr16:89805917-89806212	AluSq2	-	chr16:89815038-89815335	AluSx1	-	FANCA	9124	25168418	chr16:89805984-89805988	chr16:89815108-89815112	CTCAC	5	+
163	chr16:89805917-89806212	AluSq2	-	chr16:89825364-89825671	AluY	-	FANCA|SPIRE2	19459	25168418	chr16:89806166-89806191	chr16:89825625-89825650	GCCTCCCAAAGTGCTGGGATTACAGG	26	+
164	chr16:89808911-89809205	AluY	-	chr16:89841702-89842023	AluSp	-	FANCA|SPIRE2	32792	25168418	chr16:89809017-89809029	chr16:89841809-89841821	TGCCTCAGCCTCC	13	+
165	chr16:89808911-89809205	AluY	-	chr16:89824440-89824569	AluSc8	-	FANCA|SPIRE2	15364	25168418	chr16:89809150-89809194	chr16:89824514-89824558	CCTGCCTCGGCCTCCCAAAGTGCTGGGATTACAGGTGTGAGCCAC	45	+
166	chr16:89808911-89809205	AluY	-	chr16:89824573-89824886	AluSx4	-	FANCA|SPIRE2	15681	25168418	chr16:89809158-89809184	chr16:89824839-89824865	GGCCTCCCAAAGTGCTGGGATTACAGG	27	+
167	chr16:89812054-89812359	AluY	+	chr16:89814661-89814970	AluSg	+	FANCA	2607	25168418	chr16:89812153-89812174	chr16:89814760-89814781	GTGAAACCCTGTCTCTACTAAA	22	+
168	chr16:89812365-89812670	AluSp	+	chr16:89820762-89821061	AluSq2	+	FANCA|SPIRE2	8387	25168418	chr16:89812386-89812416	chr16:89820773-89820803	CCTGTAATCCCAGCACTTTGGGAGGCCGAGG	31	+
169	chr17:1400638-1400918	AluSq	-	chr17:1963725-1964025	AluSp	-	CRK|MYO1C|INPP5K|PITPNA-AS1|RN7SL105P|MIR22HG|PITPNA|SLC43A2|SCARF1|RILP|PRPF8|TLCD2|WDR81|SERPINF2|SERPINF1|SMYD4|RPA1|RTN4RL1	563111	25908615	chr17:1400665-1400691	chr17:1963776-1963802	GGCTGGAGTGCAGTGGTGCGATCTCGG	27	+
170	chr17:1594576-1594887	AluYk4	-	chr17:2340586-2340883	AluY	-	RN7SL105P|MIR22HG|SLC43A2|MIR132|MIR212|RN7SL624P|HNRNPA1P16|SNORD91B|SNORD91A|SCARF1|RILP|PRPF8|TLCD2|WDR81|SERPINF2|SERPINF1|SMYD4|RPA1|RTN4RL1|DPH1|OVCA2|HIC1|SMG6|SRR|TSR1|SGSM2	745996	25908615	chr17:1594810-1594834	chr17:2340806-2340830	GATCTCCTGACCTCGTGATCCGCCC	25	+
171	chr17:15538309-15538613	AluY	+	chr17:18102341-18102643	AluSg	+	ZNF29P|UBE2SP1|CDRT15P2|ZSWIM5P1|RNA5SP436|IL6STP1|MEIS3P1|RPLP1P11|RNU6-314P|RNU6-862P|RN7SL442P|MIR1288|FTLP12|FAM211A-AS1|NEK4P2|RNASEH1P2|RNU6-405P|RN7SL620P|UPF3AP1|USP32P1|SRP68P1|FAM106CP|KRT16P2|KRT17P1|COTL1P1|TBC1D27|MPRIP-AS1|RNU6-767P|RN7SL775P|RPL13P12|TSEN15P1|RNU6-468P|SMCR2|RAI1-AS1|SMCR5|MIR33B|TVP23C-CDRT4|TVP23C|CDRT1|TRIM16|ZNF286A|TBC1D26|ADORA2B|ZSWIM7|TTC19|NCOR1|PIGL|CENPV…	2564032	15526218	chr17:15538362-15538391	chr17:18102394-18102423	GGGTGGATCATGAGGTCAGGAGATCGAGAC	30	+
172	chr17:17238456-17238753	AluSc	+	chr17:19772702-19773000	AluY	+	SLC47A2|MIEF2|ALDH3A1|TOP3A|ULK2|SMCR8|SHMT1|EVPLL|LGALS9C|FAM106A|TBC1D28|ZNF286B|TRIM16L|FBXW10|RPL13P12|TSEN15P1|RNU6-468P|SMCR2|RAI1-AS1|SMCR5|MIR33B|TVP23B|RPL7AP65|RPL21P121|TBC1D3P4|YWHAEP2|KRT17P2|KRT16P1|KRT16P4|PRPSAP2|TNPO1P2|NOS2P2|USP32P2|SRP68P2|CCDC144B|SLC5A10|RN7SL639P|FOXO3B|UBE2SP2|RN7SL627P|SNORD3B-1|SNORD3B-2|KYNUP2|SNORD3D|KYNUP1|SNORD3A|FAM83G|GRAP|GRAPL|SNORD3C|KYNUP3|EPN2…	2534238	15526218	chr17:17238612-17238632	chr17:19772850-19772870	CGCCTGTAGTCCCAGCTACTC	21	+
173	chr17:31098359-31098552	AluSq2	-	chr17:31248532-31248818	AluSx1	-	NF1	150170	26189818	chr17:31098459-31098488	chr17:31248629-31248658	GGTTCAAGTGATTCTCCTGCCTCAGCCTCC	30	+
174	chr17:31143810-31144122	AluYm1	-	chr17:31157009-31157288	AluSx	-	NF1	13165	26189818	chr17:31143887-31143894	chr17:31157052-31157059	TCTCGGCT	8	+
175	chr17:31150750-31151062	AluSx	+	chr17:31157678-31157975	AluY	+	NF1	6928	26189818	chr17:31150760-31150797	chr17:31157688-31157725	GGTGGCTCACGCCTGTAATCCCAGCACTTTGGGAGGCC	38	+
176	chr17:31157678-31157975	AluY	+	chr17:31162195-31162442	AluSq2	+	NF1	4517	26189818	chr17:31157689-31157725	chr17:31162206-31162242	GTGGCTCACGCCTGTAATCCCAGCACTTTGGGAGGCC	37	+
177	chr17:31161754-31162060	AluSz	+	chr17:31173135-31173437	AluY	+	NF1	11374	26189818	chr17:31161926-31161948	chr17:31173300-31173322	CTTGGGAGGCTGAGGCAGGAGAA	23	+
178	chr17:31162195-31162442	AluSq2	+	chr17:31174829-31175132	AluSg	+	NF1	12767	26189818	chr17:31162212-31162229	chr17:31174979-31174996	CACGCCTGTAATCCCAGC	18	+
179	chr17:31162195-31162442	AluSq2	+	chr17:31173000-31173134	AluSp	+	NF1	10805	26189818	chr17:31162216-31162235	chr17:31173021-31173040	CCTGTAATCCCAGCACTTTG	20	+
180	chr17:31234392-31234699	AluY	+	chr17:31238458-31238752	AluSc8	+	NF1	4063	26189818	chr17:31234629-31234669	chr17:31238692-31238732	CCACTGCACTCCAGCCTGGGCGACAGAGCGAGACTCTGTCT	41	+
181	chr17:43102358-43102654	AluSc5	-	chr17:43192021-43192318	AluSg	-	NBR2|BRCA1|NBR1	89664	23223007	chr17:43102398-43102417	chr17:43192062-43192081	CCAGGCTGGAGTGCAGTGGC	20	+
182	chr17:5656883-5657183	AluY	+	chr17:8093578-8093869	AluSp	+	CHD3|KCNAB3|TRAPPC1|CNTROB|GUCY2D|ALOX15B|ALOX12B|WSCD1|AIPL1|FAM64A|PITPNM3|KIAA0753|TXNDC17|MED31|C17orf100|SLC13A5|XAF1|FBXO39|TEKT1|ALOX12|RNASEK|RNASEK-C17orf49|C17orf49|BCL6B|SLC16A13|SLC16A11|CLEC10A|ASGR2|ASGR1|DLG4|ACADVL|DVL2|PHF23|GABARAP|CTDNEP1|ELP5|RNU6-1264P|BTF3P14|RNA5SP435|CLDN7|MIR4520B|MIR4520A|RPL23AP73|ALOX12P2|MIR497HG|RPL7AP64|MIR324|SLC2A4|SENP3-EIF4A1|SNORA67|SNORA48|SNO…	2436695	21056402	chr17:5656883-5656891	chr17:8093578-8093586	GGCCAGGCG	9	+
183	chr17:6668450-6668756	AluSx3	-	chr17:7722957-7723268	AluY	-	SLC13A5|XAF1|FBXO39|TEKT1|ALOX12|RNASEK|RNASEK-C17orf49|C17orf49|BCL6B|SLC16A13|SLC16A11|CLEC10A|ASGR2|ASGR1|DLG4|ACADVL|DVL2|PHF23|GABARAP|CTDNEP1|ELP5|CLDN7|RPL23AP73|ALOX12P2|MIR497HG|RPL7AP64|MIR324|SLC2A4|SENP3-EIF4A1|SNORA67|SNORA48|SNORD10|YBX2|EIF5A|GPS2|NEURL4|ACAP1|KCTD11|TMEM95|TNK1|TMEM256-PLSCR3|TMEM256|NLGN2|SPEM1|C17orf74|TMEM102|FGF11|CHRNB1|ZBTB4|SLC35G6|POLR2A|TNFSF12|TNFSF12-TN…	1054513	25439725	chr17:6668738-6668745	chr17:7723251-7723258	TGAGCCAC	8	+
184	chr17:7585254-7585551	AluSx	+	chr17:8127903-8128213	AluSz6	+	CHD3|KCNAB3|TRAPPC1|CNTROB|GUCY2D|ALOX15B|ALOX12B|ALOXE3|HES7|RPL29P2|SCARNA21|MIR4314|MPDU1|SOX15|FXR2|SHBG|SAT2|ATP1B2|TP53|WRAP53|EFNB3|DNAH2|KDM6B|TMEM88|LSMD1|CYB5D1	542648	21056402	chr17:7585326-7585356	chr17:8127974-8128004	CAGGAGTTCGAGACCAGCCTGGCCAACATGG	31	+
185	chr17:911334-911627	AluY	-	chr17:1522070-1522370	AluYb8	-	NXN|TIMM22|ABR|BHLHA9|TUSC5|YWHAE|CRK|MYO1C|INPP5K|MIR3183|PITPNA-AS1|PITPNA	610742	25908615	chr17:911532-911563	chr17:1522274-1522305	TGTTAGCCAGGATGGTCTCGATCTCCTGACCT	32	+
186	chr17:1000001-1000183	AluSq4	-	chr17:1594576-1594887	AluYk4	-	TIMM22|ABR|BHLHA9|TUSC5|YWHAE|CRK|MYO1C|INPP5K|MIR3183|PITPNA-AS1|PITPNA|SLC43A2	594704	25908615	chr17:1000109-1000125	chr17:1594813-1594829	CTCCTGACCTCGTGATC	17	+
187	chr19:11083118-11083412	AluYf1	-	chr19:11092445-11092733	AluSg	-	LDLR	9325	16796766	chr19:11083306-11083314	chr19:11092631-11092639	GGGTTTCAC	9	+
188	chr19:11087573-11087879	AluY	-	chr19:11100760-11101061	AluY	-	LDLR	13186	20663204	chr19:11087684-11087725	chr19:11100870-11100911	CTCCTGCCTCAGCCTCCCGAGTAGCTGGGACTACAGGCACCC	42	+
189	chr19:11094137-11094444	AluSp	-	chr19:11106835-11107129	AluSx	-	LDLR	12685	22910581	chr19:11094376-11094396	chr19:11107061-11107081	CTCAGGTGATCCACCCGCCTC	21	+
190	chr19:11101291-11101434	FLAM_A	+	chr19:11118756-11119071	AluY	+	LDLR	17604	20663204	chr19:11101312-11101328	chr19:11118916-11118932	CTGTAGTCCCAGCTACT	17	+
191	chr19:11101944-11102242	AluY	+	chr19:11107941-11108242	AluSc8	+	LDLR	5994	17399720	chr19:11102145-11102151	chr19:11108139-11108145	TGAACCC	7	+
192	chr19:11105946-11106225	AluSx	-	chr19:11107135-11107266	AluSz6	-	LDLR	1042	16796766	chr19:11106178-11106205	chr19:11107220-11107247	GGCCTCCCAAAGTGCTGGGATTACAGGC	28	+
193	chr19:11105946-11106225	AluSx	-	chr19:11108298-11108586	AluSz	-	LDLR	2365	22910581	chr19:11106187-11106208	chr19:11108552-11108573	AAGTGCTGGGATTACAGGCGTG	22	+
194	chr19:11108298-11108586	AluSz	-	chr19:11112099-11112408	AluY	-	LDLR	3812	17399720	chr19:11108339-11108358	chr19:11112151-11112170	CAGGCTGGAGTGCAGTGGCA	20	+
195	chr19:11109689-11110000	AluSx1	-	chr19:11112706-11112987	AluSx1	-	LDLR	3012	16796766	chr19:11109786-11109793	chr19:11112798-11112805	CCAGGTTC	8	+
196	chr19:11112706-11112987	AluSx1	-	chr19:11122396-11122699	AluY	-	LDLR	9713	16796766	chr19:11112942-11112963	chr19:11122655-11122676	GCCTCCCAAAGTGCTGGGATTA	22	+
197	chr19:11112988-11113125	AluJr	-	chr19:11126927-11127238	AluSx1	-	LDLR	14110	20663204	chr19:11113077-11113108	chr19:11127187-11127218	CCTCAGCCTCCCAAAGTGCTGGGATTACAGGT	32	+
198	chr19:11125841-11126120	AluSq2	+	chr19:11132911-11133225	AluJo	+	LDLR|SPC24	7071	3818645	chr19:11125893-11125895	chr19:11132964-11132966	TGG	3	+
199	chr19:1201851-1202160	AluY	-	chr19:1212559-1212843	AluYm1	-	HMGB2P1|STK11	10703	20623358	chr19:1201876-1201901	chr19:1212579-1212604	TTTTTGAGACGGAGTCTCGCTCTGTC	26	+
200	chr19:1201851-1202160	AluY	-	chr19:1208307-1208607	AluY	-	HMGB2P1|STK11	6445	20623358	chr19:1201935-1201954	chr19:1208380-1208399	TCACTGCAAGCTCCGCCTCC	20	+
201	chr19:1203962-1204271	AluSq2	-	chr19:1219531-1219844	AluY	-	STK11	15573	20623358	chr19:1204146-1204161	chr19:1219719-1219734	GTATTTTTAGTAGAGA	16	+
202	chr19:1212559-1212843	AluYm1	-	chr19:1219531-1219844	AluY	-	STK11	7001	20435009	chr19:1212797-1212808	chr19:1219798-1219809	GCCTCCCAAAGT	12	+
203	chr19:1212852-1212979	AluJr	-	chr19:1219531-1219844	AluY	-	STK11	6865	21118512	chr19:1212933-1212958	chr19:1219798-1219823	GCCTCCCAAAGTGCTGGGATTACAGG	26	+
204	chr19:1212991-1213295	AluY	-	chr19:1219531-1219844	AluY	-	STK11	6549	20623358	chr19:1213146-1213152	chr19:1219695-1219701	GCCACCA	7	+
205	chr19:1212991-1213295	AluY	-	chr19:1219531-1219844	AluY	-	STK11	6548	20623358	chr19:1213240-1213248	chr19:1219788-1219796	GCCTGCCTC	9	+
206	chr19:48701138-48701478	AluSx1	-	chr19:48705099-48705408	AluSg	-	FUT2	3964	20880207	chr19:48701138-48701151	chr19:48705102-48705115	TTTTCTTTTCTTTT	14	+
207	chr19:54923978-54924267	AluSz6	-	chr19:54960613-54960893	AluY	-	NLRP7|NLRP2	36627	26956250	chr19:54924216-54924231	chr19:54960843-54960858	CCTCGGCCTCCCAAAG	16	+
208	chr19:54935414-54935712	AluSz	+	chr19:54936677-54936928	AluSx	+	NLRP7	1219	26956250	chr19:54935479-54935515	chr19:54936698-54936734	TGAGGTCAGGAGTTCGAGACCAGCCTGGCCAACATGG	37	+
209	chr19:54936932-54937231	AluY	+	chr19:54941972-54942284	AluY	+	NLRP7	5041	26956250	chr19:54936941-54936983	chr19:54941982-54942024	GGTGGCTCACGCCTGTAATCCCAGCACTTTGGGAGGCCGAGGC	43	+
210	chr19:54936932-54937231	AluY	+	chr19:54951265-54951581	AluSz	+	NLRP7	14329	26956250	chr19:54937099-54937111	chr19:54951428-54951440	TCCCAGCTACTCG	13	+
211	chr19:54936932-54937231	AluY	+	chr19:54947043-54947339	AluSx	+	NLRP7	10107	26956250	chr19:54937112-54937134	chr19:54947219-54947241	GGAGGCTGAGGCAGGAGAATGGC	23	+
212	chr20:2392631-2392909	AluSz	+	chr20:2395899-2396205	AluSp	+	TGM6	3269	S Gu and S Cheung, unpublished	chr20:2392646-2392657	chr20:2395915-2395926	TCACGCCTGTAA	12	+
213	chr20:25383539-25383673	AluSx3	+	chr20:25397544-25397819	AluSg4	+	ABHD12	14005	26257172	chr20:25383618-25383646	chr20:25397623-25397651	AGACCAGCCTGGCCAATATGGTGAAACCC	29	+
214	chr20:6087306-6087602	AluSx1	-	chr20:6091225-6091529	AluSz	-	FERMT1	3919	16675959	chr20:6087336-6087365	chr20:6091255-6091284	AGTCTTGCTCTGTCACCCAGGCTGGAGTGC	30	+
215	chrX:101402483-101402772	AluSx4	+	chrX:101405639-101405927	AluSx1	+	RPL36A-HNRNPH2|GLA	3155	16595074	chrX:101402668-101402675	chrX:101405823-101405830	CAGGAGAA	8	+
216	chrX:103738713-103738953	AluSx1	+	chrX:104265287-104265569	AluSz	+	RNA5SP511|DPPA3P1|H2BFXP|PLP1|RAB9B|TMSB15B|H2BFWT|H2BFM|SLC25A53|ZCCHC18|FAM199X|ESX1	526616	12297985	chrX:103738790-103738807	chrX:104265406-104265423	AAAAATACAAAAATTAGC	18	+
217	chrX:134459337-134459647	AluSx1	-	chrX:134462482-134462617	AluJb	-	HPRT1	2969	11668636	chrX:134459605-134459639	chrX:134462574-134462608	TCCCAAAGTGCTGGGATTACAGGCATGAGCCACCG	35	+
218	chrX:18369360-18369672	AluSq2	-	chrX:18526780-18527082	AluSp	-	CDKL5	157409	19471977	chrX:18369542-18369552	chrX:18526951-18526961	TTTTGTATTTT	11	+
219	chrX:18439558-18439853	AluSx	+	chrX:18514425-18514724	AluSq2	+	CDKL5	74870	19471977	chrX:18439718-18439732	chrX:18514588-18514602	TCCCAGCTACTCGGG	15	+
