# Supplementary material for: Predicting human genes susceptible to genomic instability associated with Alu/Alu-mediated rearrangements
Source: HighWire-hosted journal article supplement (doi:10.1101/gr.229401.117), 2018-06-15
Supplement: Supplemental_Table_S3.docx [file Supplemental_Table_S3.docx]

**Supplemental Table S3.** The coefficients summary of a linear regression model, which looked predicted count and gene size as independent contributors to the model.

lm(formula = log(genefreq) ~ Count of Predicted Alu pair + gene size)

| Coefficients: |  |  |  |  |  |  |
| --- | --- | --- | --- | --- | --- | --- |
|  | Estimate | Std. Error | z value | Pr(>|z|) |  |  |
| Intercept | 4.58E-01 | 7.51E-02 | 6.092 | 4.79E-09 | *** |  |
| Count of Predicted *Alu* pair | 8.58E-05 | 2.12E-05 | 4.05 | 7.04E-05 | *** |  |
| gene size | -1.11E-06 | 9.34E-07 | -1.184 | 0.238 |  |  |
|  |  |  |  |  |  |  |
| Signif.codes: | 0 '***' | 0.001 '**' | 0.01 '*' | 0.05 '.' | 0.1 ' ' | 1 |
