# Supplementary material for: Predicting human genes susceptible to genomic instability associated with Alu/Alu-mediated rearrangements
Source: HighWire-hosted journal article supplement (doi:10.1101/gr.229401.117), 2018-06-15
Supplement: Supplemental_Table_S4.xlsx [file Supplemental_Table_S4.xlsx]

## Sheet: Legend
Supplemental Table S4. Experimental validation for 89 samples with CNVs affecting AAMR hotspot genes. We performed custom-designed high resolution aCGH on all the samples, and successfully solved the breakpoint junctions for 52 simple CNVs and 1 complex genomic rearrangement. We recorded the following information for each sample per row: ID-an anonymous ID, CNV_type-CNV type, Event_type-the type …

## Sheet: Simple CNV_hg19
ID	CNV_type	Event_type	Method	PCR_primer_F	PCR_primer_R	Sequencing_primer	PredictedAlupair	5'breakpoint	3'breakpoint	5'element_Coordinate	5'element_Family	5'element_Strand	3'element_Coordinate	3'element_Family	3'element_Strand	Gene	DeletionSize(bp)	5'Microhomology	3'Microhomology	MicrohomologySequence	MicrohomologySize	Microhomologystrand
Sample1	Dup	NA	aCGH	NA	NA	NA	NA	chr1:155579958-155582115	chr1:155713668-155714841	NA	NA	NA	NA	NA	NA	MSTO1|YY1AP1|DAP3	134883	NA	NA	NA	NA	NA
Sample2	Dup	LCR-LCR	BreakpointjunctionPCR	51746F:CTATAACCCCATCGTCTGTTTCTGGGA	51746R:AAGTGCGTAAGAAGTCAAGGGAGGGTT	62780W1F:TACATGTAAATGATACAGAT	N	chr1:155573392-155587902	chr1:155711167-155723605	chr1:155573392-155587902	LCR	+	chr1:155711167-155723605	LCR	+	MSTO1|YY1AP1|DAP3|GON4L	150213	NA	NA	NA	NA	NA
Sample3	Dup	LCR-LCR	BreakpointjunctionPCR	51746F:CTATAACCCCATCGTCTGTTTCTGGGA	51746R:AAGTGCGTAAGAAGTCAAGGGAGGGTT	62780W1F:TACATGTAAATGATACAGAT	N	chr1:155573392-155587902	chr1:155711167-155723605	chr1:155573392-155587902	LCR	+	chr1:155711167-155723605	LCR	+	MSTO1|YY1AP1|DAP3|GON4L	150213	NA	NA	NA	NA	NA
Sample4	Dup	Alu-uniq	BreakpointjunctionPCR	47386F:CTTGCAGTCTCCTCCTGAAACACACAT	47386R:TCACCTACTCCCCTCACAAAGGGAGT	47386W1R:AGTCTTGCTCTGTCACCCA	N	chr1:155795157-155795158	chr1:155960080-155960081	chr1:155795082-155795381	AluSx	+	NA	NA	NA	GON4L|SYT11|RIT1|KIAA0907|RXFP4|ARHGEF2	164924	chr1:155795157-155795158	chr1:155960080-155960081	AG	2	+
Sample5	Del	LINE-LCR	BreakpointjunctionPCR	60703F:CGCCCAGCCAAATTCACTTTTAACAATA	60703R:CTAAATGCGCTCCCTCCTCAAAATAAA	60703W1F:CGCTTGAACTCAGGAATCGG	N	chr7:6030869-6030872	chr7:6043119-6043122	chr7:6030652-6030878	L1ME4a	+	chr7:6040351-6049558	LCR	+	PMS2	12253	chr7:6030869-6030872	chr7:6043119-6043122	ACAA	4	+
Sample6	Del	Alu-Alu	BreakpointjunctionPCR	60703F:CGCCCAGCCAAATTCACTTTTAACAATA	60703R:CTAAATGCGCTCCCTCCTCAAAATAAA	60703F:CGCCCAGCCAAATTCACTTTTAACAATA	Y	chr7:6030502-6030513	chr7:6046140-6046151	chr7:6030362-6030651	AluSx1	+	chr7:6046001-6046273	AluSq2	+	PMS2	15649	chr7:6030502-6030513	chr7:6046140-6046151	CAGGCATGGTGG	12	+
Sample7	Dup	NA	aCGH	NA	NA	NA	NA	chr7:5888581-5889354	chr7:6117043-6118322	NA	NA	NA	NA	NA	NA	OCM|CCZ1|RSPH10B|PMS2|AIMP2|EIF2AK1|ANKRD61	229741	NA	NA	NA	NA	NA
Sample8	Dup	NA	aCGH	NA	NA	NA	NA	chr7:5888581-5889354	chr7:6118318-6118384	NA	NA	NA	NA	NA	NA	OCM|CCZ1|RSPH10B|PMS2|AIMP2|EIF2AK1|ANKRD61	229803	NA	NA	NA	NA	NA
Sample9	Del	NA	aCGH	NA	NA	NA	NA	chr7:73657684-73660767	chr7:73663493-73663973	NA	NA	NA	NA	NA	NA	RFC2	6289	NA	NA	NA	NA	NA
Sample10	Del	Alu-Alu	BreakpointjunctionPCR	30478F:CTGAGCGAAGAGGGAGACCACATCTAT	30478R:GAGAGAAGTAAAGGACGCTGGAGACGA	30478W3R:TCCAGAAGCAAGTTTTAACCGG	Y	chr7:73660117-73660144	chr7:73663597-73663624	chr7:73660109-73660244	AluSx	+	chr7:73663589-73663900	AluSx1	+	RFC2	3507	chr7:73660117-73660144	chr7:73663597-73663624	ACAGTGGCTCACACCTATAATCCCAGCA	28	+
Sample11	Del	Alu-Alu	BreakpointjunctionPCR	30478F:CTGAGCGAAGAGGGAGACCACATCTAT	30478R:GAGAGAAGTAAAGGACGCTGGAGACGA	30478W3R:TCCAGAAGCAAGTTTTAACCGG	Y	chr7:73660117-73660144	chr7:73663597-73663624	chr7:73660109-73660244	AluSx	+	chr7:73663589-73663900	AluSx1	+	RFC2	3507	chr7:73660117-73660144	chr7:73663597-73663624	ACAGTGGCTCACACCTATAATCCCAGCA	28	+
Sample12	Del	Alu-Alu	BreakpointjunctionPCR	30478F:CTGAGCGAAGAGGGAGACCACATCTAT	30478R:GAGAGAAGTAAAGGACGCTGGAGACGA	30478W3R:TCCAGAAGCAAGTTTTAACCGG	Y	chr7:73660117-73660144	chr7:73663597-73663624	chr7:73660109-73660244	AluSx	+	chr7:73663589-73663900	AluSx1	+	RFC2	3507	chr7:73660117-73660144	chr7:73663597-73663624	ACAGTGGCTCACACCTATAATCCCAGCA	28	+
Sample13	Del	Alu-Alu	BreakpointjunctionPCR	30478F:CTGAGCGAAGAGGGAGACCACATCTAT	30478R:GAGAGAAGTAAAGGACGCTGGAGACGA	30478W3R:TCCAGAAGCAAGTTTTAACCGG	Y	chr7:73660117-73660144	chr7:73663597-73663624	chr7:73660109-73660244	AluSx	+	chr7:73663589-73663900	AluSx1	+	RFC2	3507	chr7:73660117-73660144	chr7:73663597-73663624	ACAGTGGCTCACACCTATAATCCCAGCA	28	+
Sample14	Dup	NA	aCGH	NA	NA	NA	NA	chr7:73657895-73660767	chr7:73665046-73666819	NA	NA	NA	NA	NA	NA	RFC2	8924	NA	NA	NA	NA	NA
Sample15	Dup	NA	aCGH	NA	NA	NA	NA	chr7:73657895-73660767	chr7:73665046-73666819	NA	NA	NA	NA	NA	NA	RFC2	8924	NA	NA	NA	NA	NA
Sample16	Del	Alu-Alu	BreakpointjunctionPCR	14070F:TGCAGATGATGATGCCAATTCCTAC	14070R:AAGCCAATAGGCGTTCAAATCTCAGAT	14070Wp1:AATGCGACAAGTTAGGAAATCAGAA	Y	chr7:73645061-73645078	chr7:73672804-73672821	chr7:73644934-73645112	AluSx	-	chr7:73672522-73672838	AluY	-	RFC2	27760	chr7:73645061-73645078	chr7:73672804-73672821	GCTGGGATTACAGGCGTG	18	+
Sample17	Del	Alu-Alu	BreakpointjunctionPCR	14070F:TGCAGATGATGATGCCAATTCCTAC	14070R:AAGCCAATAGGCGTTCAAATCTCAGAT	14070Wp2:TTATACTGTAGATATATCTAGGAAATGTT	Y	chr7:73645061-73645078	chr7:73672804-73672821	chr7:73644934-73645112	AluSx	-	chr7:73672522-73672838	AluY	-	RFC2	27760	chr7:73645061-73645078	chr7:73672804-73672821	GCTGGGATTACAGGCGTG	18	+
Sample18	Del	NA	aCGH	NA	NA	NA	NA	chr7:73657895-73660767	chr7:73687182-73688121	NA	NA	NA	NA	NA	NA	RFC2	30226	NA	NA	NA	NA	NA
Sample19	Del	NA	aCGH	NA	NA	NA	NA	chr7:73657895-73660767	chr7:73687182-73688121	NA	NA	NA	NA	NA	NA	RFC2	30226	NA	NA	NA	NA	NA
Sample20	Del	NA	aCGH	NA	NA	NA	NA	chr7:73583824-73584135	chr7:73690966-73693933	NA	NA	NA	NA	NA	NA	EIF4H|LAT2|RFC2	110109	NA	NA	NA	NA	NA
Sample21	Del	NA	aCGH	NA	NA	NA	NA	chr7:73581589-73583635	chr7:73690966-73693933	NA	NA	NA	NA	NA	NA	EIF4H|LAT2|RFC2	112344	NA	NA	NA	NA	NA
Sample22	Dup	Alu-Alu	BreakpointjunctionPCR	59556F:TCAGTGTATCCTTCCTGTGTCAAGCCTT	59556R:GTGTTCAAATATGCGAATGGTCAGTTCA	59556W2F:GGCGTTTCACCATGTTAGCT	Y	chr10:12100331-12100345	chr10:12166163-12166177	chr10:12100299-12100601	AluY	+	chr10:12166130-12166387	AluSx	+	DHTKD1	65846	chr10:12100331-12100345	chr10:12166163-12166177	GCACTTTGGGAGGCT	15	+
Sample23	Del	Alu-Alu	BreakpointjunctionPCR	58724F:AAGAAGCATGACTTTGCCATCAT	58724R:TAAAATGCTGATCCATGTTGCAGTA	58724W1F:ATCCTGGCTAACACGGTGAA	Y	chr10:12161539-12161550	chr10:12165521-12165532	chr10:12161333-12161643	AluY	+	chr10:12165314-12165607	AluSx	+	DHTKD1	3993	chr10:12161539-12161550	chr10:12165521-12165532	CGGGAGGCGGAG	12	+
Sample24	Dup	Alu-Alu	BreakpointjunctionPCR	59556F:TCAGTGTATCCTTCCTGTGTCAAGCCTT	59556R:GTGTTCAAATATGCGAATGGTCAGTTCA	59556W2F:GGCGTTTCACCATGTTAGCT	Y	chr10:12100331-12100345	chr10:12166163-12166177	chr10:12100299-12100601	AluY	+	chr10:12166130-12166387	AluSx	+	DHTKD1	65846	chr10:12100331-12100345	chr10:12166163-12166177	GCACTTTGGGAGGCT	15	+
Sample25	Dup	Alu-Alu	BreakpointjunctionPCR	59556F:TCAGTGTATCCTTCCTGTGTCAAGCCTT	59556R:GTGTTCAAATATGCGAATGGTCAGTTCA	59556W2F:GGCGTTTCACCATGTTAGCT	Y	chr10:12100331-12100345	chr10:12166163-12166177	chr10:12100299-12100601	AluY	+	chr10:12166130-12166387	AluSx	+	DHTKD1	65846	chr10:12100331-12100345	chr10:12166163-12166177	GCACTTTGGGAGGCT	15	+
Sample26	Dup	Alu-Alu	BreakpointjunctionPCR	59556F:TCAGTGTATCCTTCCTGTGTCAAGCCTT	59556R:GTGTTCAAATATGCGAATGGTCAGTTCA	59556W2F:GGCGTTTCACCATGTTAGCT	Y	chr10:12100331-12100345	chr10:12166163-12166177	chr10:12100299-12100601	AluY	+	chr10:12166130-12166387	AluSx	+	DHTKD1	65846	chr10:12100331-12100345	chr10:12166163-12166177	GCACTTTGGGAGGCT	15	+
Sample27	Dup	Alu-Alu	BreakpointjunctionPCR	59556F:TCAGTGTATCCTTCCTGTGTCAAGCCTT	59556R:GTGTTCAAATATGCGAATGGTCAGTTCA	59556W2F:GGCGTTTCACCATGTTAGCT	Y	chr10:12100331-12100345	chr10:12166163-12166177	chr10:12100299-12100601	AluY	+	chr10:12166130-12166387	AluSx	+	DHTKD1	65846	chr10:12100331-12100345	chr10:12166163-12166177	GCACTTTGGGAGGCT	15	+
Sample28	Dup	Alu-Alu	BreakpointjunctionPCR	59556F:TCAGTGTATCCTTCCTGTGTCAAGCCTT	59556R:GTGTTCAAATATGCGAATGGTCAGTTCA	59556W2F:GGCGTTTCACCATGTTAGCT	Y	chr10:12100331-12100345	chr10:12166163-12166177	chr10:12100299-12100601	AluY	+	chr10:12166130-12166387	AluSx	+	DHTKD1	65846	chr10:12100331-12100345	chr10:12166163-12166177	GCACTTTGGGAGGCT	15	+
Sample29	Dup	Alu-Alu	BreakpointjunctionPCR	59556F:TCAGTGTATCCTTCCTGTGTCAAGCCTT	59556R:GTGTTCAAATATGCGAATGGTCAGTTCA	59556W2F:GGCGTTTCACCATGTTAGCT	Y	chr10:12100331-12100345	chr10:12166163-12166177	chr10:12100299-12100601	AluY	+	chr10:12166130-12166387	AluSx	+	DHTKD1	65846	chr10:12100331-12100345	chr10:12166163-12166177	GCACTTTGGGAGGCT	15	+
Sample30	Dup	Alu-Alu	BreakpointjunctionPCR	59556F:TCAGTGTATCCTTCCTGTGTCAAGCCTT	59556R:GTGTTCAAATATGCGAATGGTCAGTTCA	59556W2F:GGCGTTTCACCATGTTAGCT	Y	chr10:12100331-12100345	chr10:12166163-12166177	chr10:12100299-12100601	AluY	+	chr10:12166130-12166387	AluSx	+	DHTKD1	65846	chr10:12100331-12100345	chr10:12166163-12166177	GCACTTTGGGAGGCT	15	+
Sample31	Dup	Alu-Alu	BreakpointjunctionPCR	59556F:TCAGTGTATCCTTCCTGTGTCAAGCCTT	59556R:GTGTTCAAATATGCGAATGGTCAGTTCA	59556W2F:GGCGTTTCACCATGTTAGCT	Y	chr10:12100331-12100345	chr10:12166163-12166177	chr10:12100299-12100601	AluY	+	chr10:12166130-12166387	AluSx	+	DHTKD1	65846	chr10:12100331-12100345	chr10:12166163-12166177	GCACTTTGGGAGGCT	15	+
Sample32	Dup	NA	aCGH	NA	NA	NA	NA	chr10:12045074-12045324	chr10:12170409-12170824	NA	NA	NA	NA	NA	NA	UPF2|DHTKD1	125750	NA	NA	NA	NA	NA
Sample33	Dup	Alu-Alu	BreakpointjunctionPCR	63290F:CTCCTGGGATCTGTTGGTTTATGGTGT	63290R:GCATCCTAGACCACCCTTGCTACAAAA	63290W1R:AGCACCCACTGATCTCTGTT	N	chr12:112180759-112180769	chr12:112315744-112315754	chr12:112180520-112180810	AluSq2	-	chr12:112315487-112315794	AluJb	-	ACAD10|ALDH2|MAPKAPK5	134995	chr12:112180759-112180769	chr12:112315744-112315754	CCTCAGCCTCC	11	+
Sample34	Dup	Alu-Alu	BreakpointjunctionPCR	63290F:CTCCTGGGATCTGTTGGTTTATGGTGT	63290R:GCATCCTAGACCACCCTTGCTACAAAA	63290W1R:AGCACCCACTGATCTCTGTT	N	chr12:112180759-112180769	chr12:112315744-112315754	chr12:112180520-112180810	AluSq2	-	chr12:112315487-112315794	AluJb	-	ACAD10|ALDH2|MAPKAPK5	134995	chr12:112180759-112180769	chr12:112315744-112315754	CCTCAGCCTCC	11	+
Sample35	Dup	Alu-Alu	BreakpointjunctionPCR	63290F:CTCCTGGGATCTGTTGGTTTATGGTGT	63290R:GCATCCTAGACCACCCTTGCTACAAAA	63290W1R:AGCACCCACTGATCTCTGTT	N	chr12:112180759-112180769	chr12:112315744-112315754	chr12:112180520-112180810	AluSq2	-	chr12:112315487-112315794	AluJb	-	ACAD10|ALDH2|MAPKAPK5	134995	chr12:112180759-112180769	chr12:112315744-112315754	CCTCAGCCTCC	11	+
Sample36	Dup	Alu-Alu	BreakpointjunctionPCR	63290F:CTCCTGGGATCTGTTGGTTTATGGTGT	63290R:GCATCCTAGACCACCCTTGCTACAAAA	63290W1R:AGCACCCACTGATCTCTGTT	N	chr12:112180759-112180769	chr12:112315744-112315754	chr12:112180520-112180810	AluSq2	-	chr12:112315487-112315794	AluJb	-	ACAD10|ALDH2|MAPKAPK5	134995	chr12:112180759-112180769	chr12:112315744-112315754	CCTCAGCCTCC	11	+
Sample37	Dup	NA	aCGH	NA	NA	NA	NA	chr12:112663377-112664365	chr12:112914767-112916838	NA	NA	NA	NA	NA	NA	HECTD4|RPL6|PTPN11	253461	NA	NA	NA	NA	NA
Sample38	Dup	Alu-Alu	BreakpointjunctionPCR	47129F:AGTTTCTTTTACCCCCTCACACCTTTCA	47129R:TTAGGAAGTTGTTGTCAGCAGTTGGAGA	47129W1F:AATCTGTGGGTTGGTGGAGT	Y	chr12:122746347-122746364	chr12:122759957-122759974	chr12:122746268-122746578	AluSc8	+	chr12:122759876-122760171	AluSx	+	VPS33A|CLIP1	13627	chr12:122746347-122746364	chr12:122759957-122759974	AGACCAACCTGGCCAACA	18	+
Sample39	Dup	NA	aCGH	NA	NA	NA	NA	chr14:21765976-21766126	chr14:21774145-21774178	NA	NA	NA	NA	NA	NA	RPGRIP1	8202	NA	NA	NA	NA	NA
Sample40	Del	NA	aCGH	NA	NA	NA	NA	chr14:21782600-21784890	chr14:21788433-21789142	NA	NA	NA	NA	NA	NA	RPGRIP1	6542	NA	NA	NA	NA	NA
Sample41	Del	Alu-Alu	BreakpointjunctionPCR	64805F:CGAGGTTATTACATCTTCACGCCCTCTT	64805R:GCTCTTCCCATTTAAGAAGTTATGCCAAA	64805F:CGAGGTTATTACATCTTCACGCCCTCTT	Y	chr14:21794781-21794806	chr14:21799320-21799345	chr14:21794611-21794827	AluSp	-	chr14:21799062-21799367	AluSx	-	RPGRIP1	4564	chr14:21794781-21794806	chr14:21799320-21799345	AGCCTCCCAAAGTGCTGGGATTACAG	26	+
Sample42	Del	Alu-Alu	BreakpointjunctionPCR	64805F:CGAGGTTATTACATCTTCACGCCCTCTT	64805R:GCTCTTCCCATTTAAGAAGTTATGCCAAA	64805F:CGAGGTTATTACATCTTCACGCCCTCTT	Y	chr14:21794781-21794806	chr14:21799320-21799345	chr14:21794611-21794827	AluSp	-	chr14:21799062-21799367	AluSx	-	RPGRIP1	4564	chr14:21794781-21794806	chr14:21799320-21799345	AGCCTCCCAAAGTGCTGGGATTACAG	26	+
Sample43	Del	Alu-Alu	BreakpointjunctionPCR	64805F:CGAGGTTATTACATCTTCACGCCCTCTT	64805R:GCTCTTCCCATTTAAGAAGTTATGCCAAA	64805F:CGAGGTTATTACATCTTCACGCCCTCTT	Y	chr14:21794781-21794806	chr14:21799320-21799345	chr14:21794611-21794827	AluSp	-	chr14:21799062-21799367	AluSx	-	RPGRIP1	4564	chr14:21794781-21794806	chr14:21799320-21799345	AGCCTCCCAAAGTGCTGGGATTACAG	26	+
Sample44	Del	Alu-Alu	BreakpointjunctionPCR	64805F:CGAGGTTATTACATCTTCACGCCCTCTT	64805R:GCTCTTCCCATTTAAGAAGTTATGCCAAA	64805F:CGAGGTTATTACATCTTCACGCCCTCTT	Y	chr14:21794781-21794806	chr14:21799320-21799345	chr14:21794611-21794827	AluSp	-	chr14:21799062-21799367	AluSx	-	RPGRIP1	4564	chr14:21794781-21794806	chr14:21799320-21799345	AGCCTCCCAAAGTGCTGGGATTACAG	26	+
Sample45	Del	Alu-Alu	BreakpointjunctionPCR	64805F:CGAGGTTATTACATCTTCACGCCCTCTT	64805R:GCTCTTCCCATTTAAGAAGTTATGCCAAA	64805F:CGAGGTTATTACATCTTCACGCCCTCTT	Y	chr14:21794781-21794806	chr14:21799320-21799345	chr14:21794611-21794827	AluSp	-	chr14:21799062-21799367	AluSx	-	RPGRIP1	4564	chr14:21794781-21794806	chr14:21799320-21799345	AGCCTCCCAAAGTGCTGGGATTACAG	26	+
Sample46	Del	NA	aCGH	NA	NA	NA	NA	chr14:21783745-21783787	chr14:21803648-21803998	NA	NA	NA	NA	NA	NA	RPGRIP1	20253	NA	NA	NA	NA	NA
Sample47	Dup	NA	aCGH	NA	NA	NA	NA	chr15:41670662-41672126	chr15:41689060-41689327	NA	NA	NA	NA	NA	NA	NUSAP1|NDUFAF1	18665	NA	NA	NA	NA	NA
Sample48	Dup	Alu-Alu	BreakpointjunctionPCR	49947F:AAGAGCAGGCAACTACAAAGAGAAGCCC	49947R:GGGGTGGGTGGGTAGAAGAAAGGTTAAG	49947F:AAGAGCAGGCAACTACAAAGAGAAGCCC	Y	chr15:41684493-41684513	chr15:41698386-41698406	chr15:41684259-41684571	AluSx3	-	chr15:41698155-41698464	AluSq2	-	NDUFAF1	13913	chr15:41684493-41684513	chr15:41698386-41698406	AACTCCTGACCTCAGGTGATC	21	+
Sample49	Del	NA	aCGH	NA	NA	NA	NA	chr15:41612454-41614163	chr15:41797654-41798050	NA	NA	NA	NA	NA	NA	OIP5|NUSAP1|NDUFAF1|RTF1|ITPKA|LTK	185596	NA	NA	NA	NA	NA
Sample50	Del	NA	aCGH	NA	NA	NA	NA	chr16:15780279-15781238	chr16:15793792-15794698	NA	NA	NA	NA	NA	NA	NDE1	14419	NA	NA	NA	NA	NA
Sample51	Del	Alu-uniq	BreakpointjunctionPCR	32878F:TGAATTGGAAGAAGGTGAAATGGACAAG	32878R:GAGCAAGTAATCATAAACCAAGGGACAGG	32878R:GAGCAAGTAATCATAAACCAAGGGACAGG	N	chr16:15799291-15799291	chr16:15803439-15803439	NA	NA	NA	chr16:15803200-15803470	AluSz	-	NDE1|MYH11	4148	NA	NA	NA	0	NA
Sample52	Dup	Alu-uniq	BreakpointjunctionPCR	31934F:CTGTCTCTGCAGTTGCCTCCTCTTCTC	31934R:TGATGTAAGAGATGAGAAAAACCCAACAGG	31934W1F:GCAGTGTAGGTTAGCTATGGG	N	chr16:15796336-15796336	chr16:15816331-15816331	chr16:15796268-15796562	AluJr	-	NA	NA	NA	NDE1|MYH11	19995	NA	NA	NA	0	NA
Sample53	Dup	Alu-uniq	BreakpointjunctionPCR	31934F:CTGTCTCTGCAGTTGCCTCCTCTTCTC	31934R:TGATGTAAGAGATGAGAAAAACCCAACAGG	31934W1F:GCAGTGTAGGTTAGCTATGGG	N	chr16:15796336-15796336	chr16:15816331-15816331	chr16:15796268-15796562	AluJr	-	NA	NA	NA	NDE1|MYH11	19995	NA	NA	NA	0	NA
Sample54	Dup	Alu-uniq	BreakpointjunctionPCR	31934F:CTGTCTCTGCAGTTGCCTCCTCTTCTC	31934R:TGATGTAAGAGATGAGAAAAACCCAACAGG	31934W1F:GCAGTGTAGGTTAGCTATGGG	N	chr16:15796336-15796336	chr16:15816331-15816331	chr16:15796268-15796562	AluJr	-	NA	NA	NA	NDE1|MYH11	19995	NA	NA	NA	0	NA
Sample55	Del	NA	aCGH	NA	NA	NA	NA	chr16:89830058-89831184	chr16:89840657-89841563	NA	NA	NA	NA	NA	NA	FANCA	11505	NA	NA	NA	NA	NA
Sample56	Del	NA	aCGH	NA	NA	NA	NA	chr16:89842193-89842875	chr16:89856472-89857461	NA	NA	NA	NA	NA	NA	FANCA	15268	NA	NA	NA	NA	NA
Sample57	Del	Alu-Alu	BreakpointjunctionPCR	58871F:CAGTGGACAGGGCAAGAAGGAACAAGTG	58871R:CACCTGTTTCCTTCTGCTCCTTCGCTTC	58871W1R:AGTGGCGTGATCTCAGCTC	Y	chr16:89817648-89817657	chr16:89861776-89861785	chr16:89817630-89817893	AluJb	+	chr16:89861756-89862065	AluSx3	+	FANCA	44137	chr16:89817648-89817657	chr16:89861776-89861785	CCTGTAATCC	10	+
Sample58	Del	Alu-Alu	BreakpointjunctionPCR	65635F:TTTCCTTGTCACATTTTGAAGTGCT	65625R:TGAATAAAGCACTGTGTGATTTCCTG	65635F:TTTCCTTGTCACATTTTGAAGTGCT	Y	chr16:89814083-89814095	chr16:89863542-89863554	chr16:89813840-89814146	AluSg	+	chr16:89863285-89863589	AluY	+	FANCA	49471	chr16:89814083-89814095	chr16:89863542-89863554	TGGGCGACAGAGC	13	+
Sample59	Del	Alu-Alu	BreakpointjunctionPCR	53711F:GACCTCCACCCTAAACTCCACACCCTTA	53711R:TGCTCCTCATTTCCCATCCCTCACAGTA	53711F:GACCTCCACCCTAAACTCCACACCCTTA	Y	chr16:89827581-89827592	chr16:89864039-89864050	chr16:89827546-89827856	AluY	+	chr16:89864004-89864327	AluSq	+	FANCA	36469	chr16:89827581-89827592	chr16:89864039-89864050	ACTTTGGGAGGC	12	+
Sample60	Del	Alu-Alu	BreakpointjunctionPCR	48318F:TCCTCGAAGCTGCCAGGACAAAGGT	48318R:ACTGCCAGGTGTGTGATGATGGGGA	48318W2R:CTGATCCTTGGTCCCACACA	Y	chr16:89875354-89875376	chr16:89891821-89891843	chr16:89875319-89875613	AluY	-	chr16:89891772-89892079	AluY	-	FANCA|SPIRE2	16489	chr16:89875354-89875376	chr16:89891821-89891843	CCCAGGCTGGAGTGCAGTGGCGC	23	+
Sample61	Del	NA	aCGH	NA	NA	NA	NA	chr16:89800636-89800655	chr16:89910041-89911293	NA	NA	NA	NA	NA	NA	ZNF276|FANCA|SPIRE2	110657	NA	NA	NA	NA	NA
Sample62	Dup	Alu-uniq	BreakpointjunctionPCR	51878F:TACAGCCCCTTCCCAGTGTTAAGAGG	51878R:ATCACTTAGCACCTTCCGGAAAGGAGT	51878F:TACAGCCCCTTCCCAGTGTTAAGAGG	N	chr16:89841572-89841576	chr16:89926702-89926706	NA	NA	NA	chr16:89926670-89926963	AluJr	-	FANCA|SPIRE2	85134	chr16:89841572-89841576	chr16:89926702-89926706	TGCTG	5	+
Sample63	Dup	Alu-uniq	BreakpointjunctionPCR	51878F:TACAGCCCCTTCCCAGTGTTAAGAGG	51878R:ATCACTTAGCACCTTCCGGAAAGGAGT	51878F:TACAGCCCCTTCCCAGTGTTAAGAGG	N	chr16:89841572-89841576	chr16:89926702-89926706	NA	NA	NA	chr16:89926670-89926963	AluJr	-	FANCA|SPIRE2	85134	chr16:89841572-89841576	chr16:89926702-89926706	TGCTG	5	+
Sample64	Dup	NA	aCGH	NA	NA	NA	NA	chr16:89820081-89821148	chr16:89932069-89932591	NA	NA	NA	NA	NA	NA	FANCA|SPIRE2	112510	NA	NA	NA	NA	NA
Sample65	Dup	NA	aCGH	NA	NA	NA	NA	chr16:89820081-89821148	chr16:89932069-89932591	NA	NA	NA	NA	NA	NA	FANCA|SPIRE2	112510	NA	NA	NA	NA	NA
Sample66	Dup	NA	aCGH	NA	NA	NA	NA	chr16:89910041-89911382	chr16:90107002-90107231	NA	NA	NA	NA	NA	NA	SPIRE2|TCF25|MC1R|TUBB3|DEF8|CENPBD1|DBNDD1|GAS8|C16orf3	197190	NA	NA	NA	NA	NA
Sample67	Dup	Alu-Alu	BreakpointjunctionPCR	63632F:AACACAACTCGCTTGTAAGCAACCATG	63632R:CACCATGAAGGCAAACTTTATTGGCAC	63632w1R:ACACCCTCATTCCTAGACAAG	N	chr17:1111233-1111271	chr17:1253414-1253452	chr17:1111054-1111364	AluSx1	-	chr17:1253253-1253545	AluSp	-	ABR|BHLHA9|TUSC5|YWHAE	142219	chr17:1111233-1111271	chr17:1253414-1253452	TTTTGTATTTTTAGTAGAGATGGGGTTTCTCCATGTTGG	39	+
Sample68	Dup	NA	aCGH	NA	NA	NA	NA	chr17:1095701-1096660	chr17:1261369-1262625	NA	NA	NA	NA	NA	NA	ABR|BHLHA9|TUSC5|YWHAE	166924	NA	NA	NA	NA	NA
Sample69	Dup	Alu-LINE	BreakpointjunctionPCR	44989F:CAACAAAATGCCAACCTACAGAAGAGGA	44989R:GATTTGATGCTGAAACGAGTGAACCATT	44989w1F:TTATATGATCCCACTTACATG	N	chr17:1234614-1234615	chr17:1263080-1263081	chr17:1234420-1234696	AluSq2	+	chr17:1262612-1263106	L1MB4	+	YWHAE	28467	chr17:1234614-1234615	chr17:1263080-1263081	TC	2	+
Sample70	Dup	Alu-LINE	BreakpointjunctionPCR	44989F:CAACAAAATGCCAACCTACAGAAGAGGA	44989R:GATTTGATGCTGAAACGAGTGAACCATT	44989w1F:TTATATGATCCCACTTACATG	N	chr17:1234614-1234615	chr17:1263080-1263081	chr17:1234420-1234696	AluSq2	+	chr17:1262612-1263106	L1MB4	+	YWHAE	28467	chr17:1234614-1234615	chr17:1263080-1263081	TC	2	+
Sample71	Dup	NA	aCGH	NA	NA	NA	NA	chr17:1122827-1123182	chr17:1270590-1270998	NA	NA	NA	NA	NA	NA	ABR|BHLHA9|TUSC5|YWHAE	148171	NA	NA	NA	NA	NA
Sample72	Dup	NA	aCGH	NA	NA	NA	NA	chr17:2505510-2505565	chr17:2506363-2506453	NA	NA	NA	NA	NA	NA	PAFAH1B1	943	NA	NA	NA	NA	NA
Sample73	Del	Alu-Alu	BreakpointjunctionPCR	61528F:AAGAGTTTGTTTTATGGGTTGGGCACT	61528R:TTCTGTGGGGACAGACCAGAATTAGAA	61528w1F:CGAACTCCTGACCTCGTGAT	Y	chr17:2504984-2504991	chr17:2544701-2544708	chr17:2504739-2505035	AluSq2	-	chr17:2544430-2544751	AluSx1	-	PAFAH1B1	39724	chr17:2504984-2504991	chr17:2544701-2544708	CCTCGGCC	8	+
Sample74	Dup	NA	aCGH	NA	NA	NA	NA	chr17:2524225-2524302	chr17:2601854-2602370	NA	NA	NA	NA	NA	NA	PAFAH1B1|CLUH	78145	NA	NA	NA	NA	NA
Sample75	Dup	NA	aCGH	NA	NA	NA	NA	chr17:2524225-2524734	chr17:2602450-2602546	NA	NA	NA	NA	NA	NA	PAFAH1B1|CLUH	78321	NA	NA	NA	NA	NA
Sample76	Del	Alu-Alu	BreakpointjunctionPCR	49455F:AAACCAAACCCATGCAAAAGGACCCCAT	49455R:TGAACAGTGTTGCCAAGCCCTGTAAGTG	49455F:AAACCAAACCCATGCAAAAGGACCCCAT	Y	chr17:41200437-41200445	chr17:41203867-41203875	chr17:41200215-41200520	AluSc	-	chr17:41203656-41203951	AluSg	-	BRCA1	3438	chr17:41200437-41200445	chr17:41203867-41203875	TGGTCTCGA	9	+
Sample77	Del	NA	aCGH	NA	NA	NA	NA	chr17:41235824-41236483	chr17:41250025-41251201	NA	NA	NA	NA	NA	NA	BRCA1	15377	NA	NA	NA	NA	NA
Sample78	Del	Alu-Alu	BreakpointjunctionPCR	75037F:AAGACTTGGTGTTGTGAGATTCATCAGACAT	75037R:AAGCACAGAACTGGCCAACAATTG	75037W4R:GTGGAGGTTGCGGTGAAC	Y	chr17:41236381-41236389	chr17:41251038-41251046	chr17:41236347-41236481	AluSx	-	chr17:41250837-41251138	AluSp	-	BRCA1	14665	chr17:41236381-41236389	chr17:41251038-41251046	CCATGTTGG	9	+
Sample79	Del	Alu-Alu	BreakpointjunctionPCR	62305F:CCCTGGGTCACTTATTTTCTGCGTGGTT	62305R:AGGTGGGAGGATTGCTTGGAGTTTGAGA	62305W1F:TTAGGTGATCTGCCCACCAT	Y	chr19:55444778-55444793	chr19:55475378-55475393	chr19:55444508-55444812	AluY	-	chr19:55475249-55475546	AluSg7	-	NLRP7|NLRP2	30615	chr19:55444778-55444793	chr19:55475378-55475393	GCTGGGATTACAGGCA	16	+
Sample80	Dup	Alu-Alu	BreakpointjunctionPCR	57879F:CTGTTGTGTTTGGATCTGGGGCTGAATC	57879R:TGAAGTGATGCATTGTTCCTTCAGCCTG	57879W1R:TGCTGAAATAAACACCTGCTTCA	Y	chr19:55445561-55445570	chr19:55506229-55506238	chr19:55445321-55445608	AluY	-	chr19:55505981-55506276	AluSq2	-	NLRP7|NLRP2	60677	chr19:55445561-55445570	chr19:55506229-55506238	GGCCTCCCAA	10	+
Sample81	Del	Alu-LINE	BreakpointjunctionPCR	64703F:TACTCACATTGTGTGGAGGCATGTAT	64703R:TCTGCATACCTTCCACGCATT	64703W1F:GCAACACGGTGAAAACCTGT	N	chr19:55449271-55449271	chr19:55528913-55528913	chr19:55448984-55449291	AluSq2	+	chr19:55528759-55528958	L2c	-	NLRP7|NLRP2|GP6	79642	NA	NA	NA	0	NA
Sample82	Del	Alu-LINE	BreakpointjunctionPCR	64703F:TACTCACATTGTGTGGAGGCATGTAT	64703R:TCTGCATACCTTCCACGCATT	64703W1F:GCAACACGGTGAAAACCTGT	N	chr19:55449271-55449271	chr19:55528913-55528913	chr19:55448984-55449291	AluSq2	+	chr19:55528759-55528958	L2c	-	NLRP7|NLRP2|GP6	79642	NA	NA	NA	0	NA
Sample83	Dup	NA	aCGH	NA	NA	NA	NA	chr19:55474478-55478906	chr19:55531574-55534678	NA	NA	NA	NA	NA	NA	NLRP7|NLRP2|GP6	60200	NA	NA	NA	NA	NA
Sample84	Dup	NA	aCGH	NA	NA	NA	NA	chr19:55518195-55524786	chr19:55562096-55564597	NA	NA	NA	NA	NA	NA	GP6|RDH13	46402	NA	NA	NA	NA	NA
Sample85	Dup	NA	aCGH	NA	NA	NA	NA	chr20:35535199-35537232	chr20:35551923-35552872	NA	NA	NA	NA	NA	NA	SAMHD1	17673	NA	NA	NA	NA	NA
Sample86	Del	NA	aCGH	NA	NA	NA	NA	chr20:35556476-35557605	chr20:35573982-35575028	NA	NA	NA	NA	NA	NA	SAMHD1	18552	NA	NA	NA	NA	NA
Sample87	Del	NA	aCGH	NA	NA	NA	NA	chr20:35566259-35566596	chr20:35586717-35587340	NA	NA	NA	NA	NA	NA	SAMHD1	21081	NA	NA	NA	NA	NA

## Sheet: Complex CNV_hg19
ID	CNV_type	Event_type	breakpoint 1	breakpoint 2	breakpoint 3	breakpoint 4	Method	PCR_primer_F1	PCR_primer_R1	PCR_primer_F2	PCR_primer_R2	Sequencing_primer1	Sequencing_primer2	breakpoint 1_element	breakpoint 2_element	breakpoint 3_element	breakpoint 4_element	Microhomology_seq1	Microhomology_seq2
Sample88	DUP-NML-DUP	Alu-other	chr15:41571119-41571120	chr15:41721734-41721734	chr15:41737342-41737342	chr15:41745798-41745799	BreakpointjunctionPCR	57534(4->1)F:TGCATAGTCTGACTGAGGAGGGAATCT	57534(4->1)R:GGCTCCATACCTCTCACCAAGGCCA	57534(2->3)F:GAGAGAGATGAGGTGGGGAGATTGCT	57534(2->3)R:ACTGTTAGGTTGGGAGTGTCGGAAT	57534(4->1)F:TGCATAGTCTGACTGAGGAGGGAATCT	57534-WP3R1:TTGTCTACACAGTTAAGAGCCA	LCR,chr5:72314392	L2a,chr15:41721664-41722162,+	AluY,chr15:41737119-41737432,-	AluJr4,chr15:41745642-41745952,+	AC	NA
Sample89	DUP-NML-DUP-NML-DUP	NA	NA	NA	NA	NA	aCGH	NA	NA	NA	NA	NA	NA	NA	NA	NA	NA	NA	NA

## Sheet: Simple CNV_hg38
ID	CNV_type	Event_type	Method	PCR_primer_F	PCR_primer_R	Sequencing_primer	PredictedAlupair	5'breakpoint	3'breakpoint	5'element_Coordinate	5'element_Family	5'element_Strand	3'element_Coordinate	3'element_Family	3'element_Strand	Gene	DeletionSize(bp)	5'Microhomology	3'Microhomology	MicrohomologySequence	MicrohomologySize	Microhomologystrand
Sample1	Dup	NA	aCGH	NA	NA	NA	NA	chr1:155610167-155612324	chr1:155743877-155745050	NA	NA	NA	NA	NA	NA	MSTO1|YY1AP1|DAP3	134883	NA	NA	NA	NA	NA
Sample2	Dup	LCR-LCR	BreakpointjunctionPCR	51746F:CTATAACCCCATCGTCTGTTTCTGGGA	51746R:AAGTGCGTAAGAAGTCAAGGGAGGGTT	62780W1F:TACATGTAAATGATACAGAT	N	chr1:155603601-155618111	chr1:155741376-155753814	chr1:155603601-155618111	LCR	+	chr1:155741376-155753814	LCR	+	MSTO1|YY1AP1|DAP3|GON4L	150213	NA	NA	NA	NA	NA
Sample3	Dup	LCR-LCR	BreakpointjunctionPCR	51746F:CTATAACCCCATCGTCTGTTTCTGGGA	51746R:AAGTGCGTAAGAAGTCAAGGGAGGGTT	62780W1F:TACATGTAAATGATACAGAT	N	chr1:155603601-155618111	chr1:155741376-155753814	chr1:155603601-155618111	LCR	+	chr1:155741376-155753814	LCR	+	MSTO1|YY1AP1|DAP3|GON4L	150213	NA	NA	NA	NA	NA
Sample4	Dup	Alu-uniq	BreakpointjunctionPCR	47386F:CTTGCAGTCTCCTCCTGAAACACACAT	47386R:TCACCTACTCCCCTCACAAAGGGAGT	47386W1R:AGTCTTGCTCTGTCACCCA	N	chr1:155825366-155825367	chr1:155990289-155990290	chr1:155825291-155825590	AluSx	+	NA	NA	NA	GON4L|SYT11|RIT1|KIAA0907|RXFP4|ARHGEF2	164924	chr1:155825366-155825367	chr1:155990289-155990290	AG	2	+
Sample5	Del	LINE-LCR	BreakpointjunctionPCR	60703F:CGCCCAGCCAAATTCACTTTTAACAATA	60703R:CTAAATGCGCTCCCTCCTCAAAATAAA	60703W1F:CGCTTGAACTCAGGAATCGG	N	chr7:5991238-5991241	chr7:6003488-6003491	chr7:5991021-5991247	L1ME4a	+	chr7:6000720-6009927	LCR	+	PMS2	12253	chr7:5991238-5991241	chr7:6003488-6003491	ACAA	4	+
Sample6	Del	Alu-Alu	BreakpointjunctionPCR	60703F:CGCCCAGCCAAATTCACTTTTAACAATA	60703R:CTAAATGCGCTCCCTCCTCAAAATAAA	60703F:CGCCCAGCCAAATTCACTTTTAACAATA	Y	chr7:5990871-5990882	chr7:6006509-6006520	chr7:5990731-5991020	AluSx1	+	chr7:6006370-6006642	AluSq2	+	PMS2	15649	chr7:5990871-5990882	chr7:6006509-6006520	CAGGCATGGTGG	12	+
Sample7	Dup	NA	aCGH	NA	NA	NA	NA	chr7:5848950-5849723	chr7:6077412-6078691	NA	NA	NA	NA	NA	NA	OCM|CCZ1|RSPH10B|PMS2|AIMP2|EIF2AK1|ANKRD61	229741	NA	NA	NA	NA	NA
Sample8	Dup	NA	aCGH	NA	NA	NA	NA	chr7:5848950-5849723	chr7:6078687-6078753	NA	NA	NA	NA	NA	NA	OCM|CCZ1|RSPH10B|PMS2|AIMP2|EIF2AK1|ANKRD61	229803	NA	NA	NA	NA	NA
Sample9	Del	NA	aCGH	NA	NA	NA	NA	chr7:74243354-74246437	chr7:74249163-74249643	NA	NA	NA	NA	NA	NA	RFC2	6289	NA	NA	NA	NA	NA
Sample10	Del	Alu-Alu	BreakpointjunctionPCR	30478F:CTGAGCGAAGAGGGAGACCACATCTAT	30478R:GAGAGAAGTAAAGGACGCTGGAGACGA	30478W3R:TCCAGAAGCAAGTTTTAACCGG	Y	chr7:74245787-74245814	chr7:74249267-74249294	chr7:74245779-74245914	AluSx1	+	chr7:74249259-74249570	AluSx1	+	RFC2	3507	chr7:74245787-74245814	chr7:74249267-74249294	ACAGTGGCTCACACCTATAATCCCAGCA	28	+
Sample11	Del	Alu-Alu	BreakpointjunctionPCR	30478F:CTGAGCGAAGAGGGAGACCACATCTAT	30478R:GAGAGAAGTAAAGGACGCTGGAGACGA	30478W3R:TCCAGAAGCAAGTTTTAACCGG	Y	chr7:74245787-74245814	chr7:74249267-74249294	chr7:74245779-74245914	AluSx1	+	chr7:74249259-74249570	AluSx1	+	RFC2	3507	chr7:74245787-74245814	chr7:74249267-74249294	ACAGTGGCTCACACCTATAATCCCAGCA	28	+
Sample12	Del	Alu-Alu	BreakpointjunctionPCR	30478F:CTGAGCGAAGAGGGAGACCACATCTAT	30478R:GAGAGAAGTAAAGGACGCTGGAGACGA	30478W3R:TCCAGAAGCAAGTTTTAACCGG	Y	chr7:74245787-74245814	chr7:74249267-74249294	chr7:74245779-74245914	AluSx1	+	chr7:74249259-74249570	AluSx1	+	RFC2	3507	chr7:74245787-74245814	chr7:74249267-74249294	ACAGTGGCTCACACCTATAATCCCAGCA	28	+
Sample13	Del	Alu-Alu	BreakpointjunctionPCR	30478F:CTGAGCGAAGAGGGAGACCACATCTAT	30478R:GAGAGAAGTAAAGGACGCTGGAGACGA	30478W3R:TCCAGAAGCAAGTTTTAACCGG	Y	chr7:74245787-74245814	chr7:74249267-74249294	chr7:74245779-74245914	AluSx1	+	chr7:74249259-74249570	AluSx1	+	RFC2	3507	chr7:74245787-74245814	chr7:74249267-74249294	ACAGTGGCTCACACCTATAATCCCAGCA	28	+
Sample14	Dup	NA	aCGH	NA	NA	NA	NA	chr7:74243565-74246437	chr7:74250716-74252489	NA	NA	NA	NA	NA	NA	RFC2	8924	NA	NA	NA	NA	NA
Sample15	Dup	NA	aCGH	NA	NA	NA	NA	chr7:74243565-74246437	chr7:74250716-74252489	NA	NA	NA	NA	NA	NA	RFC2	8924	NA	NA	NA	NA	NA
Sample16	Del	Alu-Alu	BreakpointjunctionPCR	14070F:TGCAGATGATGATGCCAATTCCTAC	14070R:AAGCCAATAGGCGTTCAAATCTCAGAT	14070Wp1:AATGCGACAAGTTAGGAAATCAGAA	Y	chr7:74230731-74230748	chr7:74258474-74258491	chr7:74230604-74230782	AluSx	-	chr7:74258192-74258508	AluY	-	RFC2	27760	chr7:74230731-74230748	chr7:74258474-74258491	GCTGGGATTACAGGCGTG	18	+
Sample17	Del	Alu-Alu	BreakpointjunctionPCR	14070F:TGCAGATGATGATGCCAATTCCTAC	14070R:AAGCCAATAGGCGTTCAAATCTCAGAT	14070Wp2:TTATACTGTAGATATATCTAGGAAATGTT	Y	chr7:74230731-74230748	chr7:74258474-74258491	chr7:74230604-74230782	AluSx	-	chr7:74258192-74258508	AluY	-	RFC2	27760	chr7:74230731-74230748	chr7:74258474-74258491	GCTGGGATTACAGGCGTG	18	+
Sample18	Del	NA	aCGH	NA	NA	NA	NA	chr7:74243565-74246437	chr7:74272852-74273791	NA	NA	NA	NA	NA	NA	RFC2	30226	NA	NA	NA	NA	NA
Sample19	Del	NA	aCGH	NA	NA	NA	NA	chr7:74243565-74246437	chr7:74272852-74273791	NA	NA	NA	NA	NA	NA	RFC2	30226	NA	NA	NA	NA	NA
Sample20	Del	NA	aCGH	NA	NA	NA	NA	chr7:74169494-74169805	chr7:74276636-74279603	NA	NA	NA	NA	NA	NA	EIF4H|LAT2|RFC2	110109	NA	NA	NA	NA	NA
Sample21	Del	NA	aCGH	NA	NA	NA	NA	chr7:74167259-74169305	chr7:74276636-74279603	NA	NA	NA	NA	NA	NA	EIF4H|LAT2|RFC2	112344	NA	NA	NA	NA	NA
Sample22	Dup	Alu-Alu	BreakpointjunctionPCR	59556F:TCAGTGTATCCTTCCTGTGTCAAGCCTT	59556R:GTGTTCAAATATGCGAATGGTCAGTTCA	59556W2F:GGCGTTTCACCATGTTAGCT	Y	chr10:12058332-12058346	chr10:12124164-12124178	chr10:12058300-12058602	AluY	+	chr10:12123315-12123608	AluSx	+	DHTKD1	65846	chr10:12058332-12058346	chr10:12124164-12124178	GCACTTTGGGAGGCT	15	+
Sample23	Del	Alu-Alu	BreakpointjunctionPCR	58724F:AAGAAGCATGACTTTGCCATCAT	58724R:TAAAATGCTGATCCATGTTGCAGTA	58724W1F:ATCCTGGCTAACACGGTGAA	Y	chr10:12119540-12119551	chr10:12123522-12123533	chr10:12119334-12119644	AluY	+	chr10:12124131-12124388	AluSx	+	DHTKD1	3993	chr10:12119540-12119551	chr10:12123522-12123533	CGGGAGGCGGAG	12	+
Sample24	Dup	Alu-Alu	BreakpointjunctionPCR	59556F:TCAGTGTATCCTTCCTGTGTCAAGCCTT	59556R:GTGTTCAAATATGCGAATGGTCAGTTCA	59556W2F:GGCGTTTCACCATGTTAGCT	Y	chr10:12058332-12058346	chr10:12124164-12124178	chr10:12058300-12058602	AluY	+	chr10:12124131-12124388	AluSx	+	DHTKD1	65846	chr10:12058332-12058346	chr10:12124164-12124178	GCACTTTGGGAGGCT	15	+
Sample25	Dup	Alu-Alu	BreakpointjunctionPCR	59556F:TCAGTGTATCCTTCCTGTGTCAAGCCTT	59556R:GTGTTCAAATATGCGAATGGTCAGTTCA	59556W2F:GGCGTTTCACCATGTTAGCT	Y	chr10:12058332-12058346	chr10:12124164-12124178	chr10:12058300-12058602	AluY	+	chr10:12124131-12124388	AluSx	+	DHTKD1	65846	chr10:12058332-12058346	chr10:12124164-12124178	GCACTTTGGGAGGCT	15	+
Sample26	Dup	Alu-Alu	BreakpointjunctionPCR	59556F:TCAGTGTATCCTTCCTGTGTCAAGCCTT	59556R:GTGTTCAAATATGCGAATGGTCAGTTCA	59556W2F:GGCGTTTCACCATGTTAGCT	Y	chr10:12058332-12058346	chr10:12124164-12124178	chr10:12058300-12058602	AluY	+	chr10:12124131-12124388	AluSx	+	DHTKD1	65846	chr10:12058332-12058346	chr10:12124164-12124178	GCACTTTGGGAGGCT	15	+
Sample27	Dup	Alu-Alu	BreakpointjunctionPCR	59556F:TCAGTGTATCCTTCCTGTGTCAAGCCTT	59556R:GTGTTCAAATATGCGAATGGTCAGTTCA	59556W2F:GGCGTTTCACCATGTTAGCT	Y	chr10:12058332-12058346	chr10:12124164-12124178	chr10:12058300-12058602	AluY	+	chr10:12124131-12124388	AluSx	+	DHTKD1	65846	chr10:12058332-12058346	chr10:12124164-12124178	GCACTTTGGGAGGCT	15	+
Sample28	Dup	Alu-Alu	BreakpointjunctionPCR	59556F:TCAGTGTATCCTTCCTGTGTCAAGCCTT	59556R:GTGTTCAAATATGCGAATGGTCAGTTCA	59556W2F:GGCGTTTCACCATGTTAGCT	Y	chr10:12058332-12058346	chr10:12124164-12124178	chr10:12058300-12058602	AluY	+	chr10:12124131-12124388	AluSx	+	DHTKD1	65846	chr10:12058332-12058346	chr10:12124164-12124178	GCACTTTGGGAGGCT	15	+
Sample29	Dup	Alu-Alu	BreakpointjunctionPCR	59556F:TCAGTGTATCCTTCCTGTGTCAAGCCTT	59556R:GTGTTCAAATATGCGAATGGTCAGTTCA	59556W2F:GGCGTTTCACCATGTTAGCT	Y	chr10:12058332-12058346	chr10:12124164-12124178	chr10:12058300-12058602	AluY	+	chr10:12124131-12124388	AluSx	+	DHTKD1	65846	chr10:12058332-12058346	chr10:12124164-12124178	GCACTTTGGGAGGCT	15	+
Sample30	Dup	Alu-Alu	BreakpointjunctionPCR	59556F:TCAGTGTATCCTTCCTGTGTCAAGCCTT	59556R:GTGTTCAAATATGCGAATGGTCAGTTCA	59556W2F:GGCGTTTCACCATGTTAGCT	Y	chr10:12058332-12058346	chr10:12124164-12124178	chr10:12058300-12058602	AluY	+	chr10:12124131-12124388	AluSx	+	DHTKD1	65846	chr10:12058332-12058346	chr10:12124164-12124178	GCACTTTGGGAGGCT	15	+
Sample31	Dup	Alu-Alu	BreakpointjunctionPCR	59556F:TCAGTGTATCCTTCCTGTGTCAAGCCTT	59556R:GTGTTCAAATATGCGAATGGTCAGTTCA	59556W2F:GGCGTTTCACCATGTTAGCT	Y	chr10:12058332-12058346	chr10:12124164-12124178	chr10:12058300-12058602	AluY	+	chr10:12124131-12124388	AluSx	+	DHTKD1	65846	chr10:12058332-12058346	chr10:12124164-12124178	GCACTTTGGGAGGCT	15	+
Sample32	Dup	NA	aCGH	NA	NA	NA	NA	chr10:12003075-12003325	chr10:12128410-12128825	NA	NA	NA	NA	NA	NA	UPF2|DHTKD1	125750	NA	NA	NA	NA	NA
Sample33	Dup	Alu-Alu	BreakpointjunctionPCR	63290F:CTCCTGGGATCTGTTGGTTTATGGTGT	63290R:GCATCCTAGACCACCCTTGCTACAAAA	63290W1R:AGCACCCACTGATCTCTGTT	N	chr12:111742955-111742965	chr12:111877940-111877950	chr12:111742716-111743006	AluSq2	-	chr12:111877683-111877990	AluJb	-	ACAD10|ALDH2|MAPKAPK5	134995	chr12:111742955-111742965	chr12:111877940-111877950	CCTCAGCCTCC	11	+
Sample34	Dup	Alu-Alu	BreakpointjunctionPCR	63290F:CTCCTGGGATCTGTTGGTTTATGGTGT	63290R:GCATCCTAGACCACCCTTGCTACAAAA	63290W1R:AGCACCCACTGATCTCTGTT	N	chr12:111742955-111742965	chr12:111877940-111877950	chr12:111742716-111743006	AluSq2	-	chr12:111877683-111877990	AluJb	-	ACAD10|ALDH2|MAPKAPK5	134995	chr12:111742955-111742965	chr12:111877940-111877950	CCTCAGCCTCC	11	+
Sample35	Dup	Alu-Alu	BreakpointjunctionPCR	63290F:CTCCTGGGATCTGTTGGTTTATGGTGT	63290R:GCATCCTAGACCACCCTTGCTACAAAA	63290W1R:AGCACCCACTGATCTCTGTT	N	chr12:111742955-111742965	chr12:111877940-111877950	chr12:111742716-111743006	AluSq2	-	chr12:111877683-111877990	AluJb	-	ACAD10|ALDH2|MAPKAPK5	134995	chr12:111742955-111742965	chr12:111877940-111877950	CCTCAGCCTCC	11	+
Sample36	Dup	Alu-Alu	BreakpointjunctionPCR	63290F:CTCCTGGGATCTGTTGGTTTATGGTGT	63290R:GCATCCTAGACCACCCTTGCTACAAAA	63290W1R:AGCACCCACTGATCTCTGTT	N	chr12:111742955-111742965	chr12:111877940-111877950	chr12:111742716-111743006	AluSq2	-	chr12:111877683-111877990	AluJb	-	ACAD10|ALDH2|MAPKAPK5	134995	chr12:111742955-111742965	chr12:111877940-111877950	CCTCAGCCTCC	11	+
Sample37	Dup	NA	aCGH	NA	NA	NA	NA	chr12:112225573-112226561	chr12:112476963-112479034	NA	NA	NA	NA	NA	NA	HECTD4|RPL6|PTPN11	253461	NA	NA	NA	NA	NA
Sample38	Dup	Alu-Alu	BreakpointjunctionPCR	47129F:AGTTTCTTTTACCCCCTCACACCTTTCA	47129R:TTAGGAAGTTGTTGTCAGCAGTTGGAGA	47129W1F:AATCTGTGGGTTGGTGGAGT	Y	chr12:122261800-122261817	chr12:122275410-122275427	chr12:122261721-122262031	AluSc8	+	chr12:122275329-122275624	AluSx	+	VPS33A|CLIP1	13627	chr12:122261800-122261817	chr12:122275410-122275427	AGACCAACCTGGCCAACA	18	+
Sample39	Dup	NA	aCGH	NA	NA	NA	NA	chr14:21297817-21297967	chr14:21305986-21306019	NA	NA	NA	NA	NA	NA	RPGRIP1	8202	NA	NA	NA	NA	NA
Sample40	Del	NA	aCGH	NA	NA	NA	NA	chr14:21314441-21316731	chr14:21320274-21320983	NA	NA	NA	NA	NA	NA	RPGRIP1	6542	NA	NA	NA	NA	NA
Sample41	Del	Alu-Alu	BreakpointjunctionPCR	64805F:CGAGGTTATTACATCTTCACGCCCTCTT	64805R:GCTCTTCCCATTTAAGAAGTTATGCCAAA	64805F:CGAGGTTATTACATCTTCACGCCCTCTT	Y	chr14:21326622-21326647	chr14:21331161-21331186	chr14:21326496-21326668	AluSp	-	chr14:21330900-21331208	AluSx	-	RPGRIP1	4564	chr14:21326622-21326647	chr14:21331161-21331186	AGCCTCCCAAAGTGCTGGGATTACAG	26	+
Sample42	Del	Alu-Alu	BreakpointjunctionPCR	64805F:CGAGGTTATTACATCTTCACGCCCTCTT	64805R:GCTCTTCCCATTTAAGAAGTTATGCCAAA	64805F:CGAGGTTATTACATCTTCACGCCCTCTT	Y	chr14:21326622-21326647	chr14:21331161-21331186	chr14:21326496-21326668	AluSp	-	chr14:21330900-21331208	AluSx	-	RPGRIP1	4564	chr14:21326622-21326647	chr14:21331161-21331186	AGCCTCCCAAAGTGCTGGGATTACAG	26	+
Sample43	Del	Alu-Alu	BreakpointjunctionPCR	64805F:CGAGGTTATTACATCTTCACGCCCTCTT	64805R:GCTCTTCCCATTTAAGAAGTTATGCCAAA	64805F:CGAGGTTATTACATCTTCACGCCCTCTT	Y	chr14:21326622-21326647	chr14:21331161-21331186	chr14:21326496-21326668	AluSp	-	chr14:21330900-21331208	AluSx	-	RPGRIP1	4564	chr14:21326622-21326647	chr14:21331161-21331186	AGCCTCCCAAAGTGCTGGGATTACAG	26	+
Sample44	Del	Alu-Alu	BreakpointjunctionPCR	64805F:CGAGGTTATTACATCTTCACGCCCTCTT	64805R:GCTCTTCCCATTTAAGAAGTTATGCCAAA	64805F:CGAGGTTATTACATCTTCACGCCCTCTT	Y	chr14:21326622-21326647	chr14:21331161-21331186	chr14:21326496-21326668	AluSp	-	chr14:21330900-21331208	AluSx	-	RPGRIP1	4564	chr14:21326622-21326647	chr14:21331161-21331186	AGCCTCCCAAAGTGCTGGGATTACAG	26	+
Sample45	Del	Alu-Alu	BreakpointjunctionPCR	64805F:CGAGGTTATTACATCTTCACGCCCTCTT	64805R:GCTCTTCCCATTTAAGAAGTTATGCCAAA	64805F:CGAGGTTATTACATCTTCACGCCCTCTT	Y	chr14:21326622-21326647	chr14:21331161-21331186	chr14:21326496-21326668	AluSp	-	chr14:21330900-21331208	AluSx	-	RPGRIP1	4564	chr14:21326622-21326647	chr14:21331161-21331186	AGCCTCCCAAAGTGCTGGGATTACAG	26	+
Sample46	Del	NA	aCGH	NA	NA	NA	NA	chr14:21315586-21315628	chr14:21335489-21335839	NA	NA	NA	NA	NA	NA	RPGRIP1	20253	NA	NA	NA	NA	NA
Sample47	Dup	NA	aCGH	NA	NA	NA	NA	chr15:41378464-41379928	chr15:41396862-41397129	NA	NA	NA	NA	NA	NA	NUSAP1|NDUFAF1	18665	NA	NA	NA	NA	NA
Sample48	Dup	Alu-Alu	BreakpointjunctionPCR	49947F:AAGAGCAGGCAACTACAAAGAGAAGCCC	49947R:GGGGTGGGTGGGTAGAAGAAAGGTTAAG	49947F:AAGAGCAGGCAACTACAAAGAGAAGCCC	Y	chr15:41392295-41392315	chr15:41406188-41406208	chr15:41392061-41392373	AluSz	-	chr15:41405957-41406266	AluSq2	-	NDUFAF1	13913	chr15:41392295-41392315	chr15:41406188-41406208	AACTCCTGACCTCAGGTGATC	21	+
Sample49	Del	NA	aCGH	NA	NA	NA	NA	chr15:41320256-41321965	chr15:41505456-41505852	NA	NA	NA	NA	NA	NA	OIP5|NUSAP1|NDUFAF1|RTF1|ITPKA|LTK	185596	NA	NA	NA	NA	NA
Sample50	Del	NA	aCGH	NA	NA	NA	NA	chr16:15686422-15687381	chr16:15699935-15700841	NA	NA	NA	NA	NA	NA	NDE1	14419	NA	NA	NA	NA	NA
Sample51	Del	Alu-uniq	BreakpointjunctionPCR	32878F:TGAATTGGAAGAAGGTGAAATGGACAAG	32878R:GAGCAAGTAATCATAAACCAAGGGACAGG	32878R:GAGCAAGTAATCATAAACCAAGGGACAGG	N	chr16:15705434-15705434	chr16:15709582-15709582	NA	NA	NA	chr16:15709343-15709613	AluSz	-	NDE1|MYH11	4148	NA	NA	NA	0	NA
Sample52	Dup	Alu-uniq	BreakpointjunctionPCR	31934F:CTGTCTCTGCAGTTGCCTCCTCTTCTC	31934R:TGATGTAAGAGATGAGAAAAACCCAACAGG	31934W1F:GCAGTGTAGGTTAGCTATGGG	N	chr16:15702479-15702479	chr16:15722474-15722474	chr16:15702411-15702705	AluJr	-	NA	NA	NA	NDE1|MYH11	19995	NA	NA	NA	0	NA
Sample53	Dup	Alu-uniq	BreakpointjunctionPCR	31934F:CTGTCTCTGCAGTTGCCTCCTCTTCTC	31934R:TGATGTAAGAGATGAGAAAAACCCAACAGG	31934W1F:GCAGTGTAGGTTAGCTATGGG	N	chr16:15702479-15702479	chr16:15722474-15722474	chr16:15702411-15702705	AluJr	-	NA	NA	NA	NDE1|MYH11	19995	NA	NA	NA	0	NA
Sample54	Dup	Alu-uniq	BreakpointjunctionPCR	31934F:CTGTCTCTGCAGTTGCCTCCTCTTCTC	31934R:TGATGTAAGAGATGAGAAAAACCCAACAGG	31934W1F:GCAGTGTAGGTTAGCTATGGG	N	chr16:15702479-15702479	chr16:15722474-15722474	chr16:15702411-15702705	AluJr	-	NA	NA	NA	NDE1|MYH11	19995	NA	NA	NA	0	NA
Sample55	Del	NA	aCGH	NA	NA	NA	NA	chr16:89763650-89764776	chr16:89774249-89775155	NA	NA	NA	NA	NA	NA	FANCA	11505	NA	NA	NA	NA	NA
Sample56	Del	NA	aCGH	NA	NA	NA	NA	chr16:89775785-89776467	chr16:89790064-89791053	NA	NA	NA	NA	NA	NA	FANCA	15268	NA	NA	NA	NA	NA
Sample57	Del	Alu-Alu	BreakpointjunctionPCR	58871F:CAGTGGACAGGGCAAGAAGGAACAAGTG	58871R:CACCTGTTTCCTTCTGCTCCTTCGCTTC	58871W1R:AGTGGCGTGATCTCAGCTC	Y	chr16:89751240-89751249	chr16:89795368-89795377	chr16:89751222-89751485	AluJb	+	chr16:89795348-89795657	AluSx3	+	FANCA	44137	chr16:89751240-89751249	chr16:89795368-89795377	CCTGTAATCC	10	+
Sample58	Del	Alu-Alu	BreakpointjunctionPCR	65635F:TTTCCTTGTCACATTTTGAAGTGCT	65625R:TGAATAAAGCACTGTGTGATTTCCTG	65635F:TTTCCTTGTCACATTTTGAAGTGCT	Y	chr16:89747675-89747687	chr16:89797134-89797146	chr16:89747432-89747703	AluSg	+	chr16:89796877-89797181	AluY	+	FANCA	49471	chr16:89747675-89747687	chr16:89797134-89797146	TGGGCGACAGAGC	13	+
Sample59	Del	Alu-Alu	BreakpointjunctionPCR	53711F:GACCTCCACCCTAAACTCCACACCCTTA	53711R:TGCTCCTCATTTCCCATCCCTCACAGTA	53711F:GACCTCCACCCTAAACTCCACACCCTTA	Y	chr16:89761173-89761184	chr16:89797631-89797642	chr16:89761138-89761448	AluY	+	chr16:89797596-89797919	AluSq	+	FANCA	36469	chr16:89761173-89761184	chr16:89797631-89797642	ACTTTGGGAGGC	12	+
Sample60	Del	Alu-Alu	BreakpointjunctionPCR	48318F:TCCTCGAAGCTGCCAGGACAAAGGT	48318R:ACTGCCAGGTGTGTGATGATGGGGA	48318W2R:CTGATCCTTGGTCCCACACA	Y	chr16:89808946-89808968	chr16:89825413-89825435	chr16:89808911-89809205	AluY	-	chr16:89825364-89825671	AluY	-	FANCA|SPIRE2	16489	chr16:89808946-89808968	chr16:89825413-89825435	CCCAGGCTGGAGTGCAGTGGCGC	23	+
Sample61	Del	NA	aCGH	NA	NA	NA	NA	chr16:89734228-89734247	chr16:89843633-89844885	NA	NA	NA	NA	NA	NA	ZNF276|FANCA|SPIRE2	110657	NA	NA	NA	NA	NA
Sample62	Dup	Alu-uniq	BreakpointjunctionPCR	51878F:TACAGCCCCTTCCCAGTGTTAAGAGG	51878R:ATCACTTAGCACCTTCCGGAAAGGAGT	51878F:TACAGCCCCTTCCCAGTGTTAAGAGG	N	chr16:89775164-89775168	chr16:89860294-89860298	NA	NA	NA	chr16:89860262-89860555	AluJr	-	FANCA|SPIRE2	85134	chr16:89775164-89775168	chr16:89860294-89860298	TGCTG	5	+
Sample63	Dup	Alu-uniq	BreakpointjunctionPCR	51878F:TACAGCCCCTTCCCAGTGTTAAGAGG	51878R:ATCACTTAGCACCTTCCGGAAAGGAGT	51878F:TACAGCCCCTTCCCAGTGTTAAGAGG	N	chr16:89775164-89775168	chr16:89860294-89860298	NA	NA	NA	chr16:89860262-89860555	AluJr	-	FANCA|SPIRE2	85134	chr16:89775164-89775168	chr16:89860294-89860298	TGCTG	5	+
Sample64	Dup	NA	aCGH	NA	NA	NA	NA	chr16:89753673-89754740	chr16:89865661-89866183	NA	NA	NA	NA	NA	NA	FANCA|SPIRE2	112510	NA	NA	NA	NA	NA
Sample65	Dup	NA	aCGH	NA	NA	NA	NA	chr16:89753673-89754740	chr16:89865661-89866183	NA	NA	NA	NA	NA	NA	FANCA|SPIRE2	112510	NA	NA	NA	NA	NA
Sample66	Dup	NA	aCGH	NA	NA	NA	NA	chr16:89843633-89844974	chr16:90040594-90040823	NA	NA	NA	NA	NA	NA	SPIRE2|TCF25|MC1R|TUBB3|DEF8|CENPBD1|DBNDD1|GAS8|C16orf3	197190	NA	NA	NA	NA	NA
Sample67	Dup	Alu-Alu	BreakpointjunctionPCR	63632F:AACACAACTCGCTTGTAAGCAACCATG	63632R:CACCATGAAGGCAAACTTTATTGGCAC	63632w1R:ACACCCTCATTCCTAGACAAG	N	chr17:1207939-1207977	chr17:1350120-1350158	chr17:1207760-1208070	AluSx1	-	chr17:1349959-1350251	AluSp	-	ABR|BHLHA9|TUSC5|YWHAE	142219	chr17:1207939-1207977	chr17:1350120-1350158	TTTTGTATTTTTAGTAGAGATGGGGTTTCTCCATGTTGG	39	+
Sample68	Dup	NA	aCGH	NA	NA	NA	NA	chr17:1192407-1193366	chr17:1358075-1359331	NA	NA	NA	NA	NA	NA	ABR|BHLHA9|TUSC5|YWHAE	166924	NA	NA	NA	NA	NA
Sample69	Dup	Alu-LINE	BreakpointjunctionPCR	44989F:CAACAAAATGCCAACCTACAGAAGAGGA	44989R:GATTTGATGCTGAAACGAGTGAACCATT	44989w1F:TTATATGATCCCACTTACATG	N	chr17:1331320-1331321	chr17:1359786-1359787	chr17:1331126-1331402	AluSq2	+	chr17:1359318-1359812	L1MB4	+	YWHAE	28467	chr17:1331320-1331321	chr17:1359786-1359787	TC	2	+
Sample70	Dup	Alu-LINE	BreakpointjunctionPCR	44989F:CAACAAAATGCCAACCTACAGAAGAGGA	44989R:GATTTGATGCTGAAACGAGTGAACCATT	44989w1F:TTATATGATCCCACTTACATG	N	chr17:1331320-1331321	chr17:1359786-1359787	chr17:1331126-1331402	AluSq2	+	chr17:1359318-1359812	L1MB4	+	YWHAE	28467	chr17:1331320-1331321	chr17:1359786-1359787	TC	2	+
Sample71	Dup	NA	aCGH	NA	NA	NA	NA	chr17:1219533-1219888	chr17:1367296-1367704	NA	NA	NA	NA	NA	NA	ABR|BHLHA9|TUSC5|YWHAE	148171	NA	NA	NA	NA	NA
Sample72	Dup	NA	aCGH	NA	NA	NA	NA	chr17:2602216-2602271	chr17:2603069-2603159	NA	NA	NA	NA	NA	NA	PAFAH1B1	943	NA	NA	NA	NA	NA
Sample73	Del	Alu-Alu	BreakpointjunctionPCR	61528F:AAGAGTTTGTTTTATGGGTTGGGCACT	61528R:TTCTGTGGGGACAGACCAGAATTAGAA	61528w1F:CGAACTCCTGACCTCGTGAT	Y	chr17:2601690-2601697	chr17:2641407-2641414	chr17:2601445-2601741	AluSq2	-	chr17:2641136-2641457	AluSx1	-	PAFAH1B1	39724	chr17:2601690-2601697	chr17:2641407-2641414	CCTCGGCC	8	+
Sample74	Dup	NA	aCGH	NA	NA	NA	NA	chr17:2620931-2621008	chr17:2698560-2699076	NA	NA	NA	NA	NA	NA	PAFAH1B1|CLUH	78145	NA	NA	NA	NA	NA
Sample75	Dup	NA	aCGH	NA	NA	NA	NA	chr17:2620931-2621440	chr17:2699156-2699252	NA	NA	NA	NA	NA	NA	PAFAH1B1|CLUH	78321	NA	NA	NA	NA	NA
Sample76	Del	Alu-Alu	BreakpointjunctionPCR	49455F:AAACCAAACCCATGCAAAAGGACCCCAT	49455R:TGAACAGTGTTGCCAAGCCCTGTAAGTG	49455F:AAACCAAACCCATGCAAAAGGACCCCAT	Y	chr17:43048420-43048428	chr17:43051850-43051858	chr17:43048198-43048503	AluSc	-	chr17:43051639-43051934	AluSg	-	BRCA1	3438	chr17:43048420-43048428	chr17:43051850-43051858	TGGTCTCGA	9	+
Sample77	Del	NA	aCGH	NA	NA	NA	NA	chr17:43083807-43084466	chr17:43098008-43099184	NA	NA	NA	NA	NA	NA	BRCA1	15377	NA	NA	NA	NA	NA
Sample78	Del	Alu-Alu	BreakpointjunctionPCR	75037F:AAGACTTGGTGTTGTGAGATTCATCAGACAT	75037R:AAGCACAGAACTGGCCAACAATTG	75037W4R:GTGGAGGTTGCGGTGAAC	Y	chr17:43084364-43084372	chr17:43099021-43099029	chr17:43084330-43084464	AluSx1	-	chr17:43098820-43099121	AluSp	-	BRCA1	14665	chr17:43084364-43084372	chr17:43099021-43099029	CCATGTTGG	9	+
Sample79	Del	Alu-Alu	BreakpointjunctionPCR	62305F:CCCTGGGTCACTTATTTTCTGCGTGGTT	62305R:AGGTGGGAGGATTGCTTGGAGTTTGAGA	62305W1F:TTAGGTGATCTGCCCACCAT	Y	chr19:54933410-54933425	chr19:54964010-54964025	chr19:54933140-54933444	AluY	-	chr19:54963881-54964178	AluSg7	-	NLRP7|NLRP2	30615	chr19:54933410-54933425	chr19:54964010-54964025	GCTGGGATTACAGGCA	16	+
Sample80	Dup	Alu-Alu	BreakpointjunctionPCR	57879F:CTGTTGTGTTTGGATCTGGGGCTGAATC	57879R:TGAAGTGATGCATTGTTCCTTCAGCCTG	57879W1R:TGCTGAAATAAACACCTGCTTCA	Y	chr19:54934193-54934202	chr19:54994861-54994870	chr19:54933953-54934240	AluY	-	chr19:54994613-54994908	AluSq2	-	NLRP7|NLRP2	60677	chr19:54934193-54934202	chr19:54994861-54994870	GGCCTCCCAA	10	+
Sample81	Del	Alu-LINE	BreakpointjunctionPCR	64703F:TACTCACATTGTGTGGAGGCATGTAT	64703R:TCTGCATACCTTCCACGCATT	64703W1F:GCAACACGGTGAAAACCTGT	N	chr19:54937903-54937903	chr19:55017545-55017545	chr19:54937616-54937921	AluSq2	+	chr19:55017391-55017590	L2c	-	NLRP7|NLRP2|GP6	79642	NA	NA	NA	0	NA
Sample82	Del	Alu-LINE	BreakpointjunctionPCR	64703F:TACTCACATTGTGTGGAGGCATGTAT	64703R:TCTGCATACCTTCCACGCATT	64703W1F:GCAACACGGTGAAAACCTGT	N	chr19:54937903-54937903	chr19:55017545-55017545	chr19:54937616-54937921	AluSq2	+	chr19:55017391-55017590	L2c	-	NLRP7|NLRP2|GP6	79642	NA	NA	NA	0	NA
Sample83	Dup	NA	aCGH	NA	NA	NA	NA	chr19:54963110-54967538	chr19:55020206-55023310	NA	NA	NA	NA	NA	NA	NLRP7|NLRP2|GP6	60200	NA	NA	NA	NA	NA
Sample84	Dup	NA	aCGH	NA	NA	NA	NA	chr19:55006827-55013418	chr19:55050728-55053229	NA	NA	NA	NA	NA	NA	GP6|RDH13	46402	NA	NA	NA	NA	NA
Sample85	Dup	NA	aCGH	NA	NA	NA	NA	chr20:36906796-36908829	chr20:36923520-36924469	NA	NA	NA	NA	NA	NA	SAMHD1	17673	NA	NA	NA	NA	NA
Sample86	Del	NA	aCGH	NA	NA	NA	NA	chr20:36928073-36929202	chr20:36945579-36946625	NA	NA	NA	NA	NA	NA	SAMHD1	18552	NA	NA	NA	NA	NA
Sample87	Del	NA	aCGH	NA	NA	NA	NA	chr20:36937856-36938193	chr20:36958314-36958937	NA	NA	NA	NA	NA	NA	SAMHD1	21081	NA	NA	NA	NA	NA

## Sheet: Complec CNV_hg38
ID	CNV_type	Event_type	breakpoint 1	breakpoint 2	breakpoint 3	breakpoint 4	Method	PCR_primer_F1	PCR_primer_R1	PCR_primer_F2	PCR_primer_R2	Sequencing_primer1	Sequencing_primer2	breakpoint 1_element	breakpoint 2_element	breakpoint 3_element	breakpoint 4_element	Microhomology_seq1	Microhomology_seq2
Sample88	DUP-NML-DUP	Alu-other	chr15:41278921-41278922	chr15:41429536-41429536	chr15:41445144-41445144	chr15:41453600-41453601	BreakpointjunctionPCR	57534(4->1)F:TGCATAGTCTGACTGAGGAGGGAATCT	57534(4->1)R:GGCTCCATACCTCTCACCAAGGCCA	57534(2->3)F:GAGAGAGATGAGGTGGGGAGATTGCT	57534(2->3)R:ACTGTTAGGTTGGGAGTGTCGGAAT	57534(4->1)F:TGCATAGTCTGACTGAGGAGGGAATCT	57534-WP3R1:TTGTCTACACAGTTAAGAGCCA	LCR,chr5:73018565	L2a,chr15:41429466-41429964,+	AluY,chr15:41444921-41445234,-	AluJr4,chr15:41453444-41453754,+	AC	NA
Sample89	DUP-NML-DUP-NML-DUP	NA	NA	NA	NA	NA	aCGH	NA	NA	NA	NA	NA	NA	NA	NA	NA	NA	NA	NA
